# Supplementary material
Source: PubMed Central journal article supplement (PMC8585718)

**Supporting Information for**

**Synthesis, Structure-Activity Relationship and Antiviral Activity of  
Indole-Containing Inhibitors of Flavivirus NS2B-NS3 protease**

Shenyue Nie,<sup>1,†</sup> Jidong Zhao,<sup>1,†</sup> Xiaowei Wu,<sup>1,†</sup> Yuan Yao,<sup>1,†</sup> Fangrui Wu,<sup>1</sup> Yi-Lun Lin,<sup>1</sup> Xin Li,<sup>1</sup> Alexander R. Kneubehl,<sup>2</sup> Megan B. Vogt,<sup>2,3</sup> Rebecca Rico-Hesse,<sup>2</sup> and Yongcheng Song<sup>1,\*</sup>

<sup>1</sup>Department of Pharmacology and Chemical Biology, <sup>2</sup>Department of Molecular Virology and Microbiology, <sup>3</sup>Intragrative Molecular and Biomedical Sciences Graduate Program, Baylor College of Medicine, 1 Baylor Plaza, Houston, TX 77030, USA.

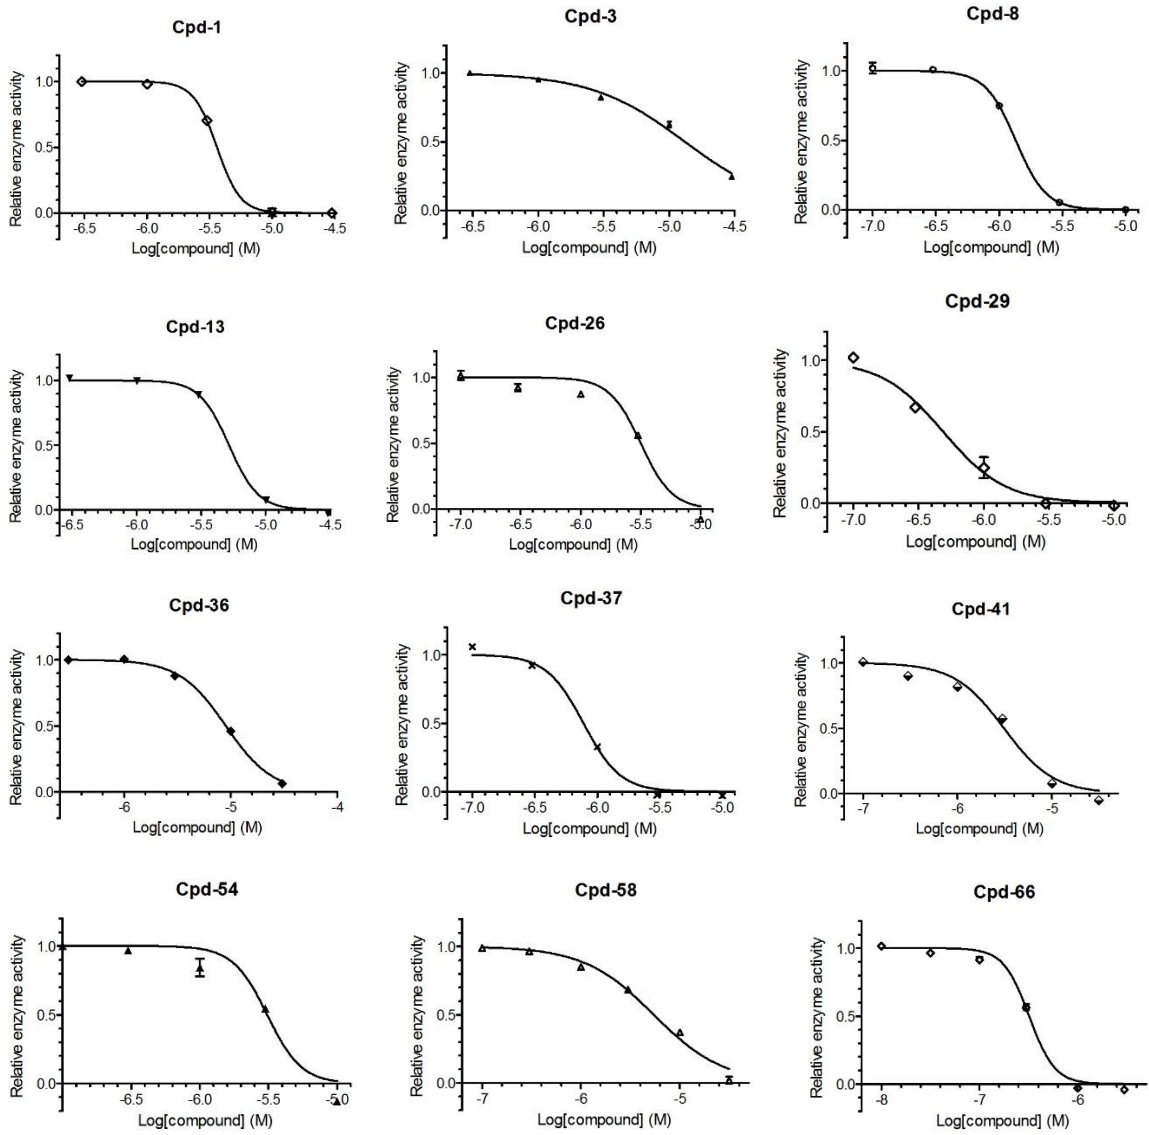

Figure S1. Dose-responsive curves for representative inhibitors of ZVpro.

### NMR spectra for compounds 1-73.

1. 5,6-Bis(4-(tert-butyl)phenyl)-N-(piperidin-4-yl)-1H-indole-3-carboxamide Hydrochloride (1).

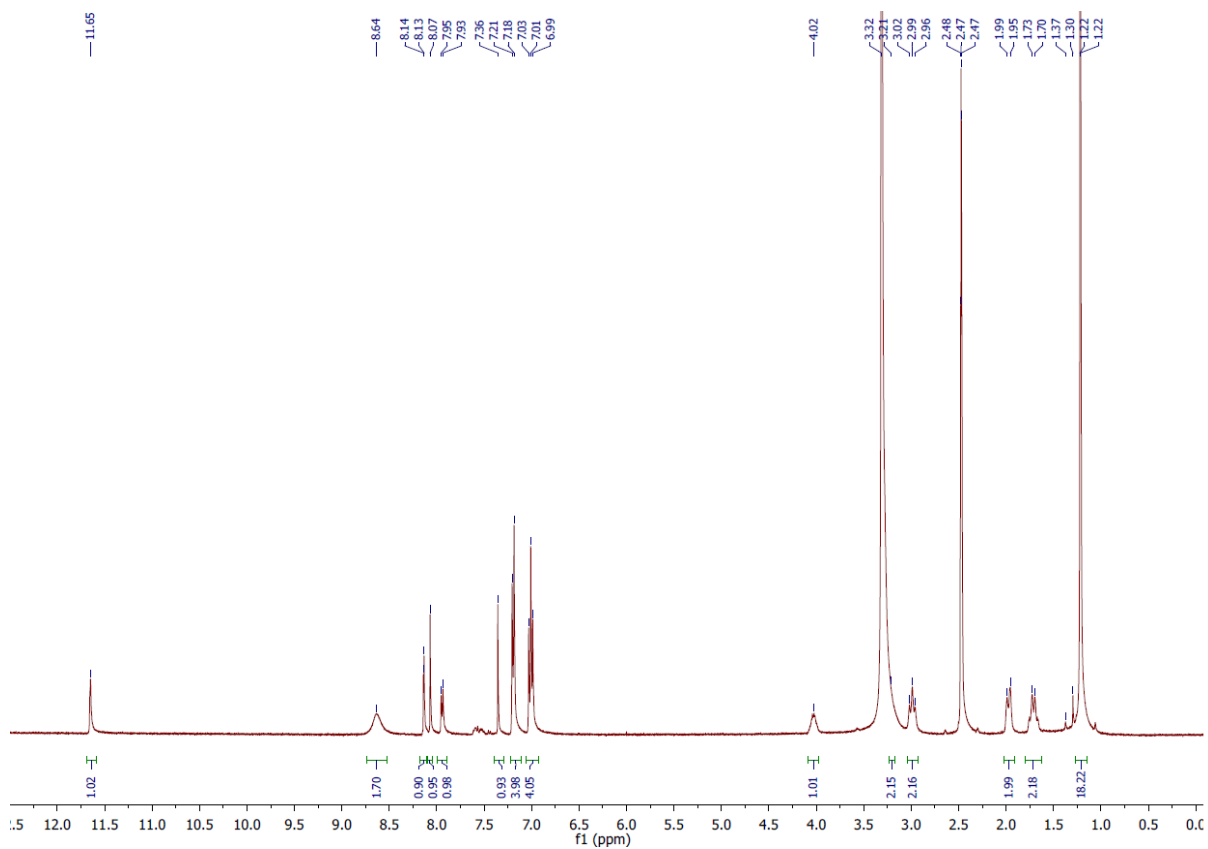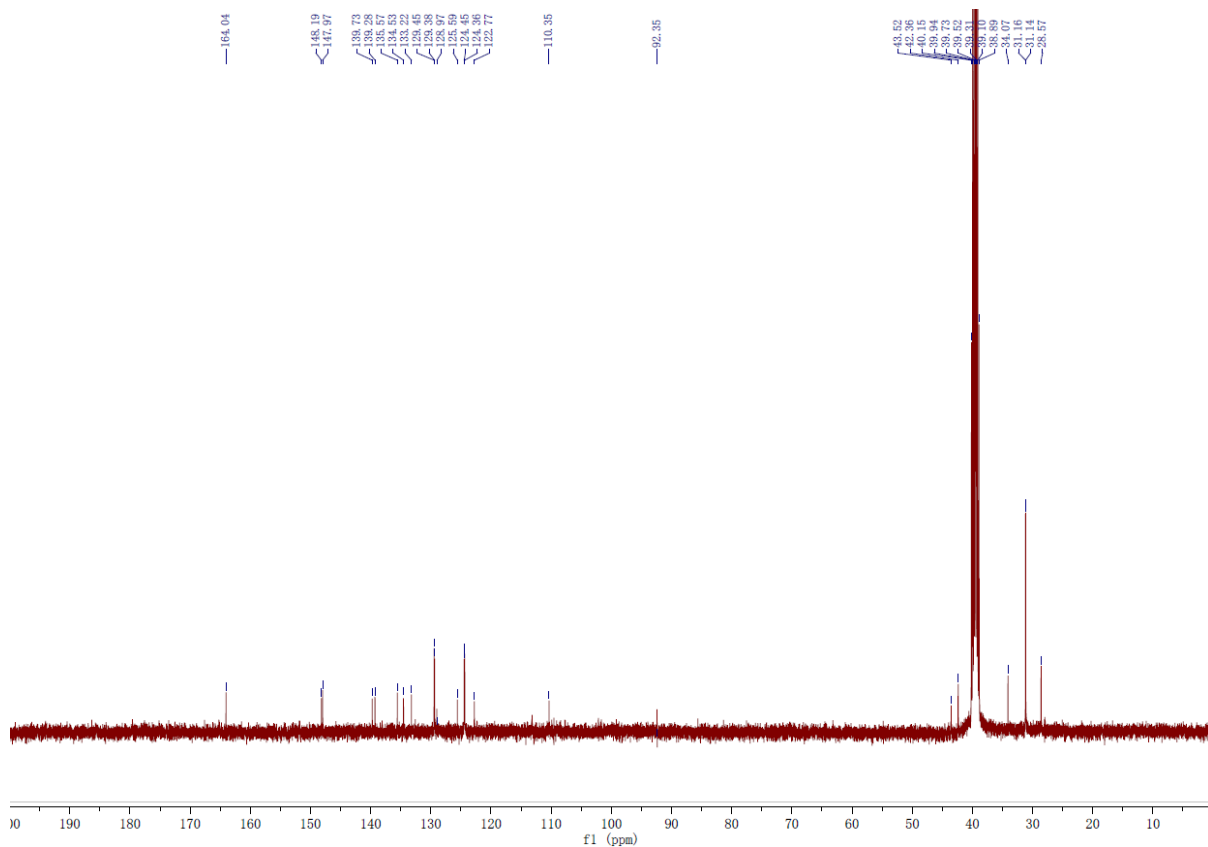

## 2. 5-(4-(Tert-butyl)phenyl)-N-(piperidin-4-ylmethyl)-1H-indole-3-carboxamide (2).

zjd1-83-2h-dmso

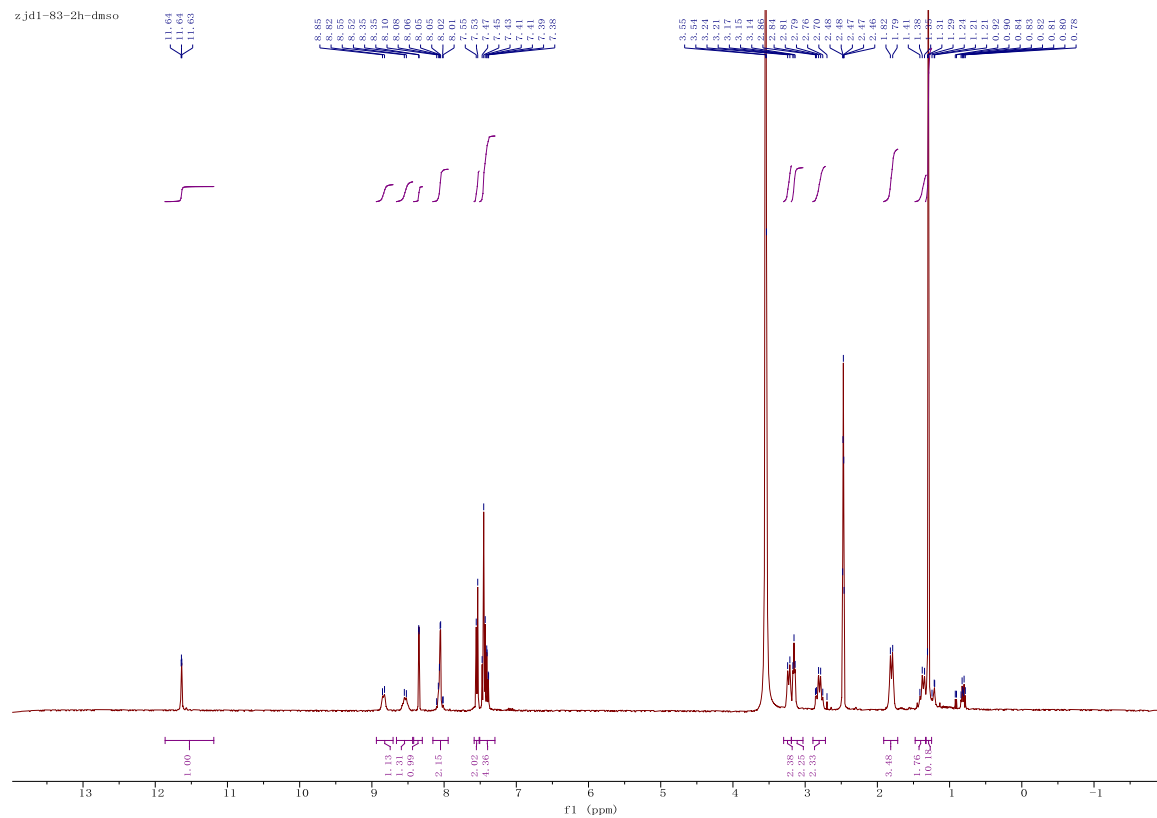

zjd1-83-2c-dmso

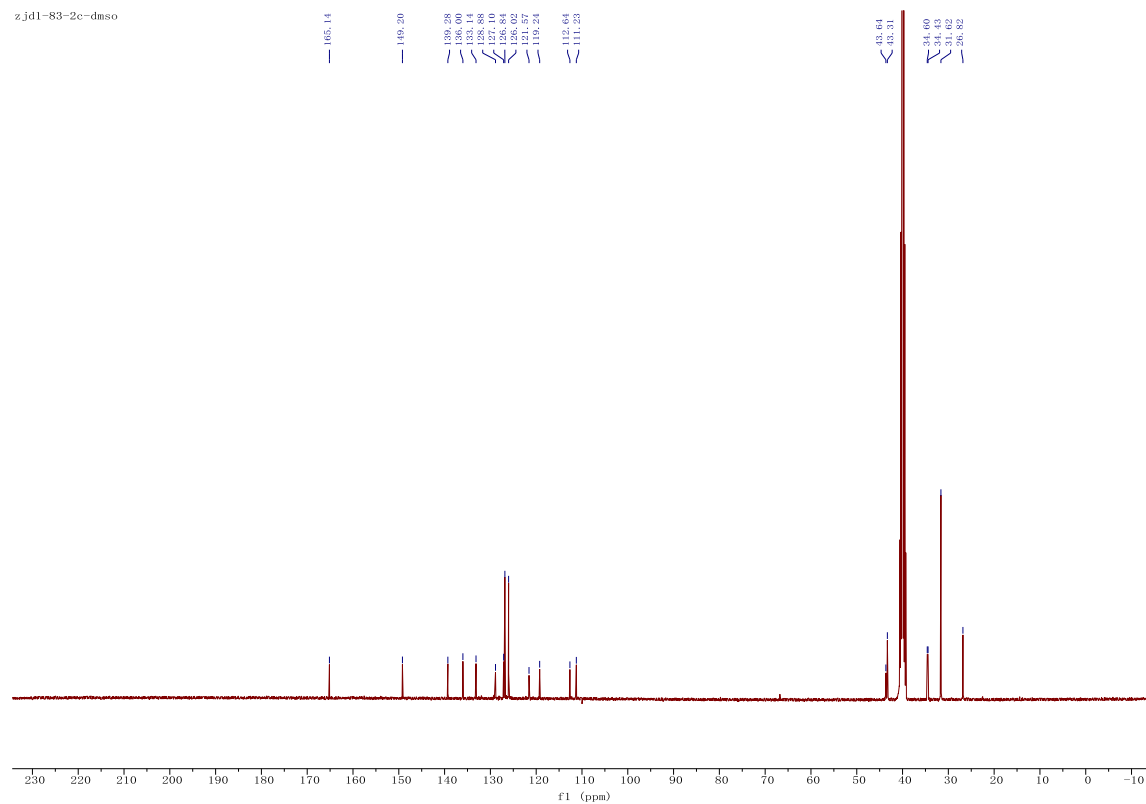

3. 5-(4-(Tert-butyl)phenyl)-1-(3-(piperidin-4-yl)propyl)-N-(piperidin-4-ylmethyl)-1H-indole-3-carboxamide Hydrochloride

(3).

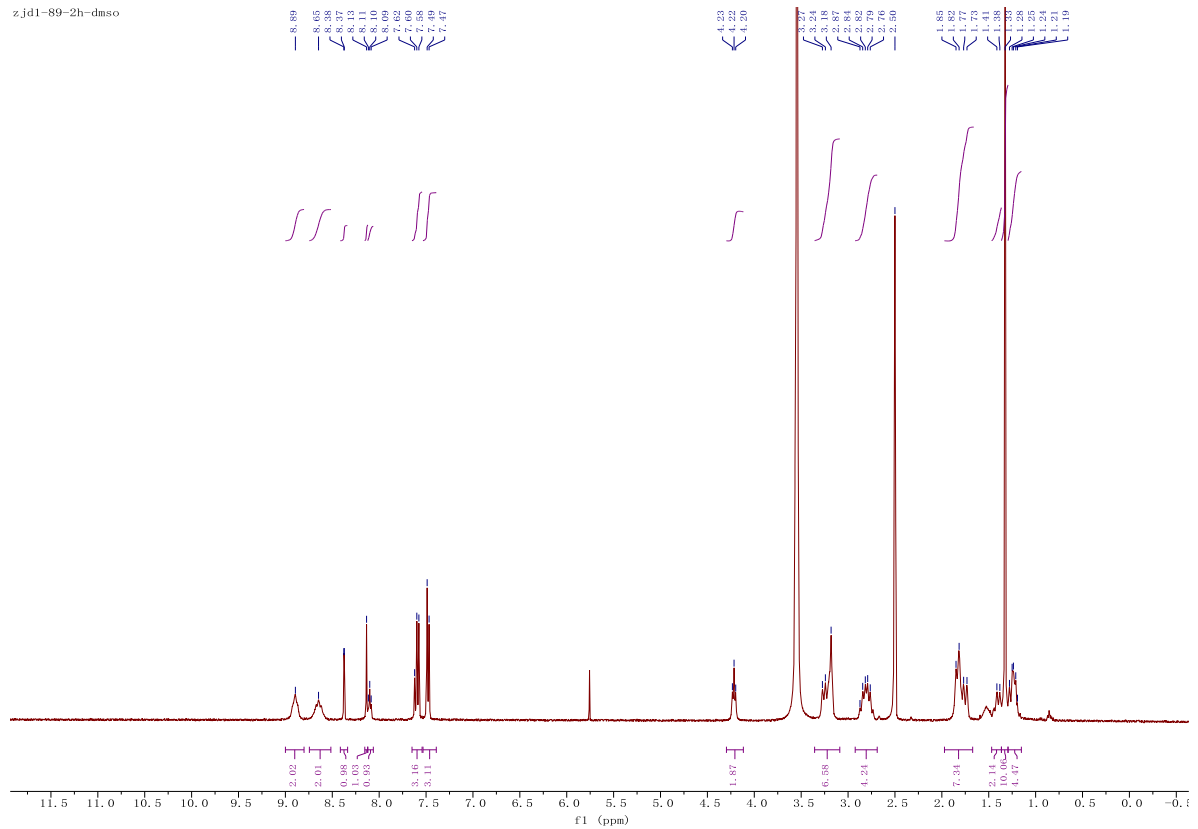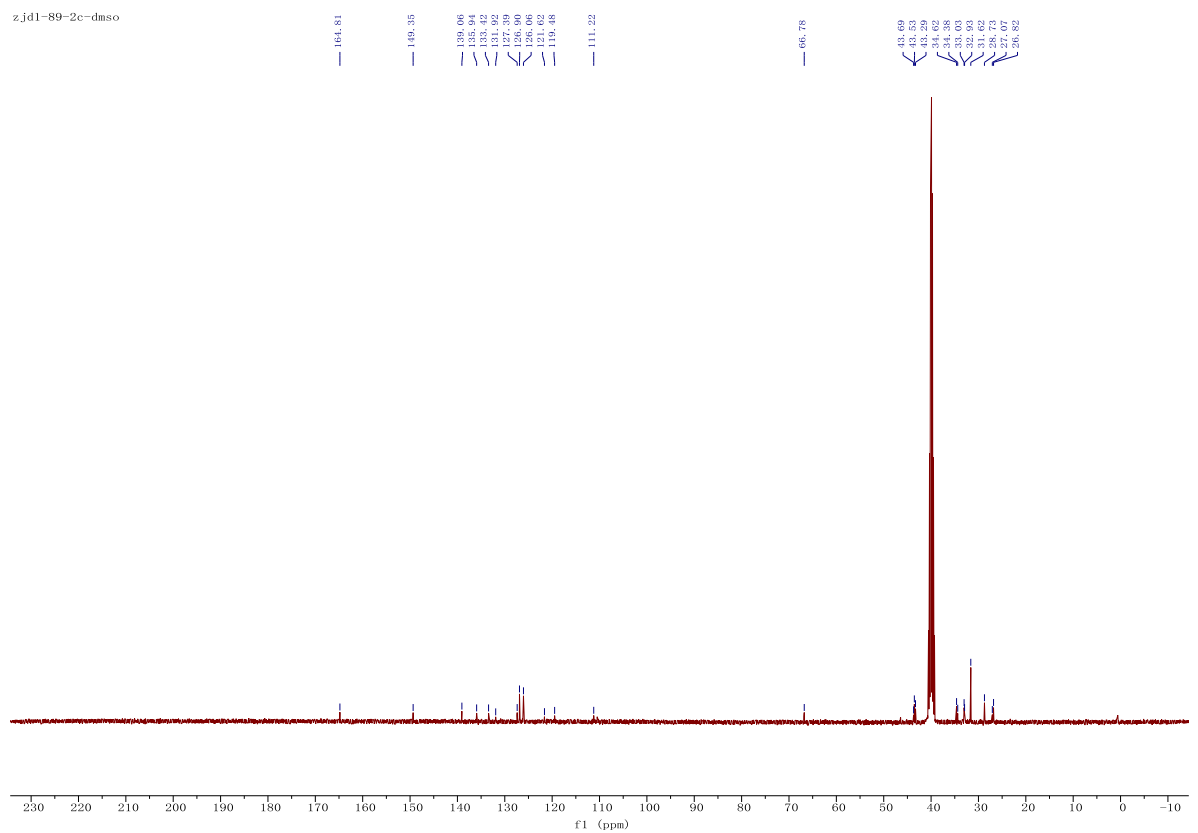

4. 5-(4-(Tert-butyl)phenyl)-1-(4-(furan-3-yl)benzyl)-1H-indole Hydrochloride (**4**).

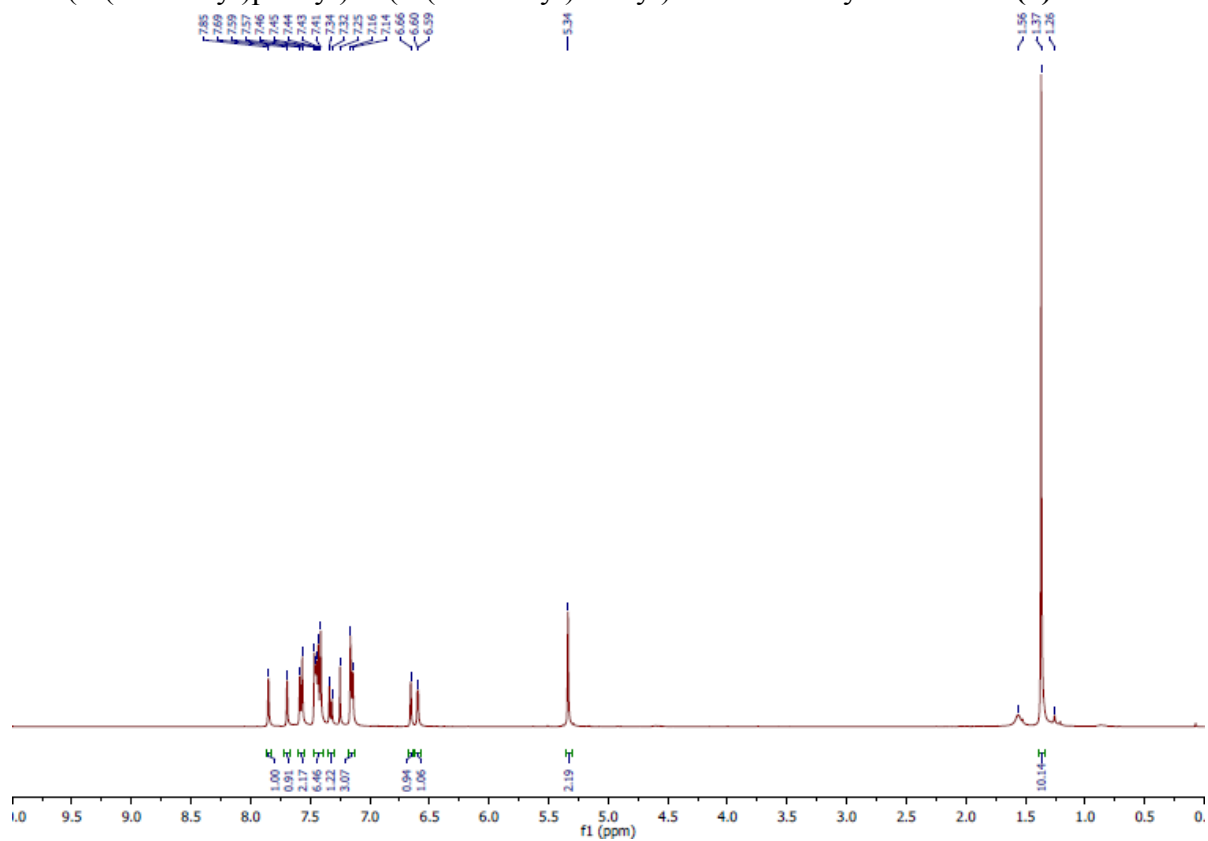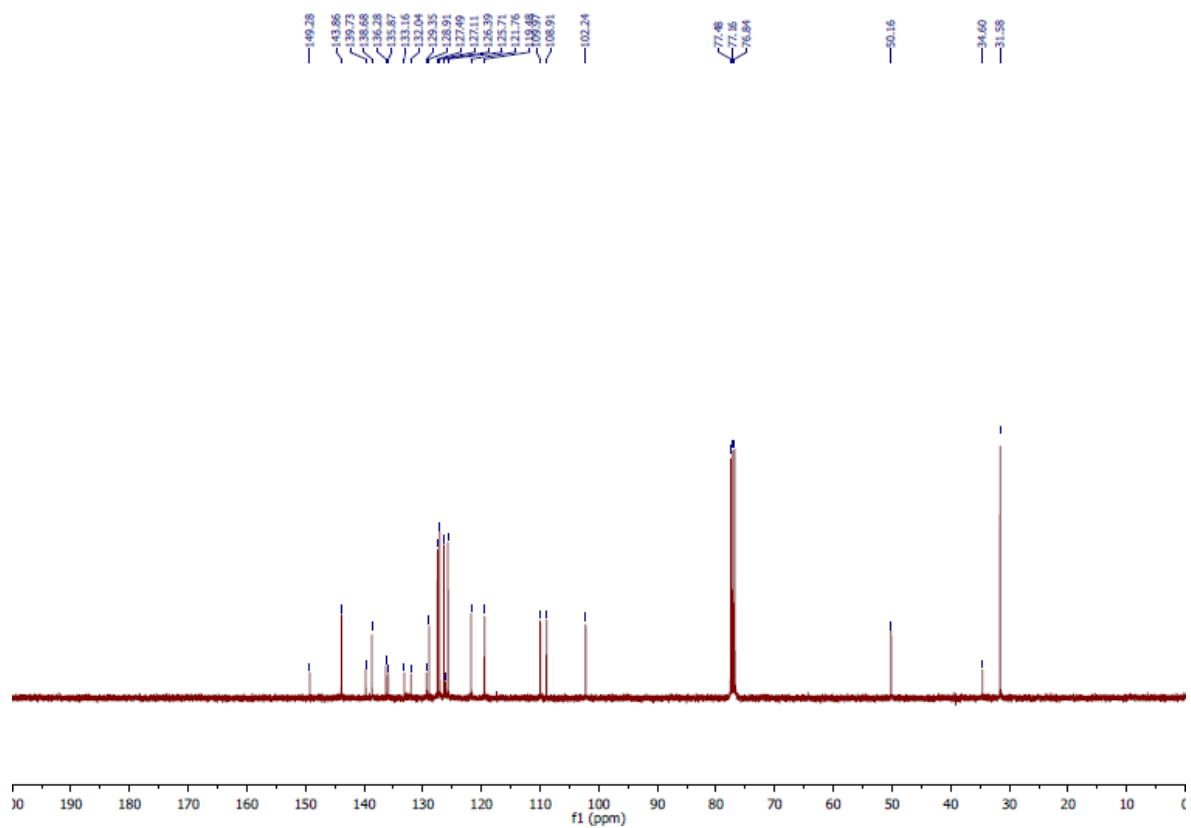

5. 5-(4-(Tert-butyl)phenyl)-1-(4-(pyridin-4-yl)benzyl)-1H-indole Hydrochloride (**5**)

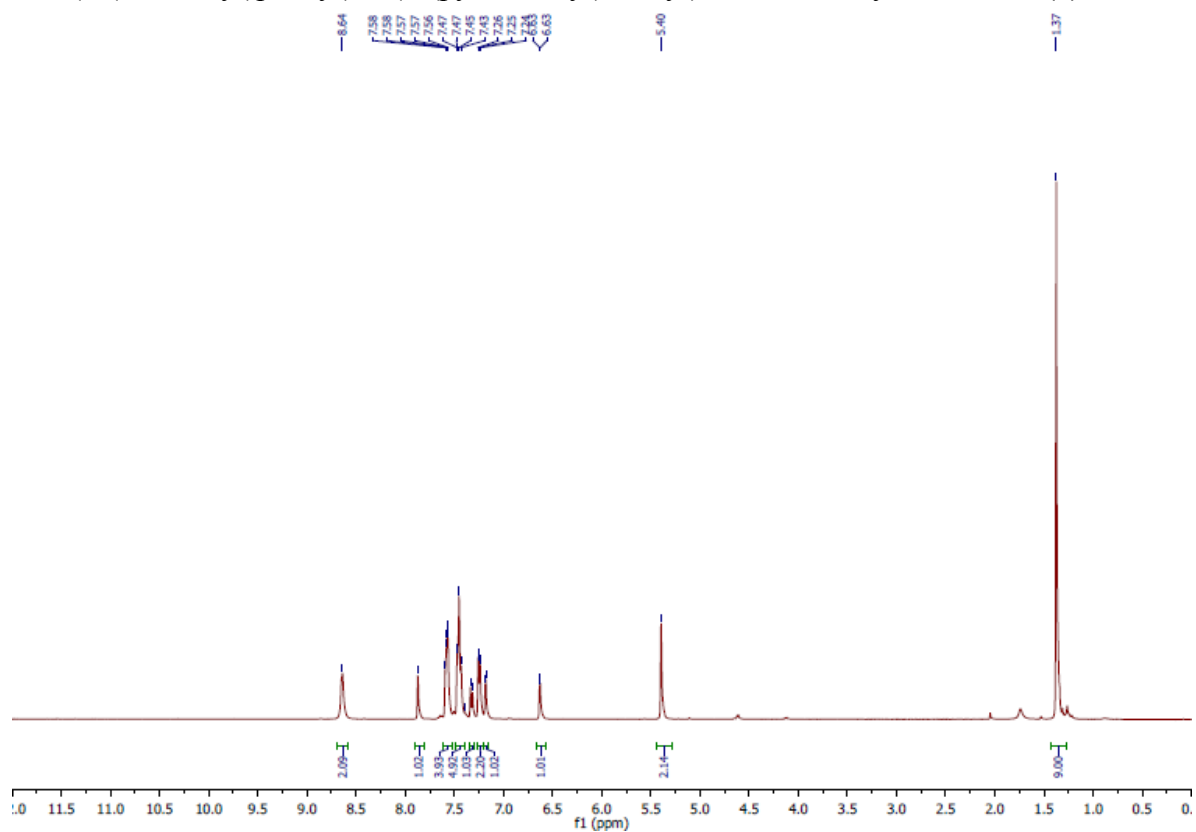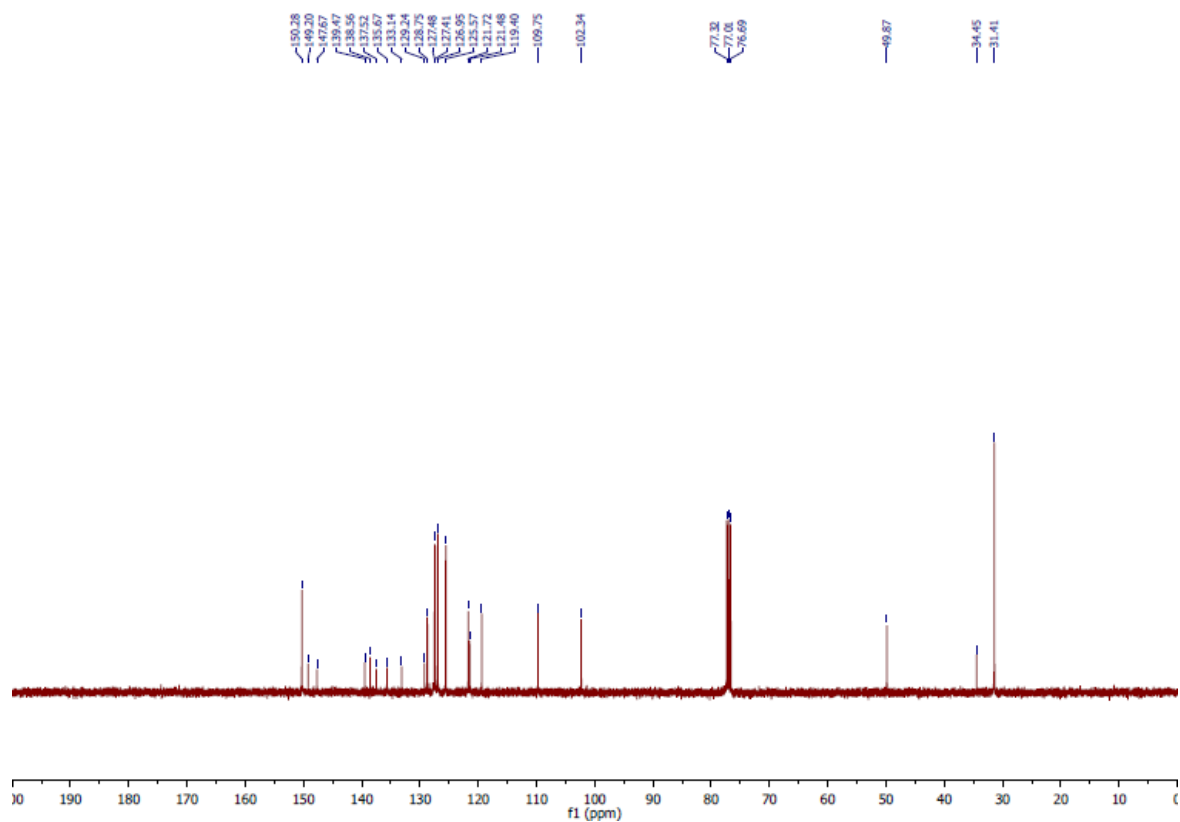

6.

5-(4-(Tert-butyl)phenyl)-N-(piperidin-4-ylmethyl)-1H-indole-2-carboxamide Hydrochloride  
(6).

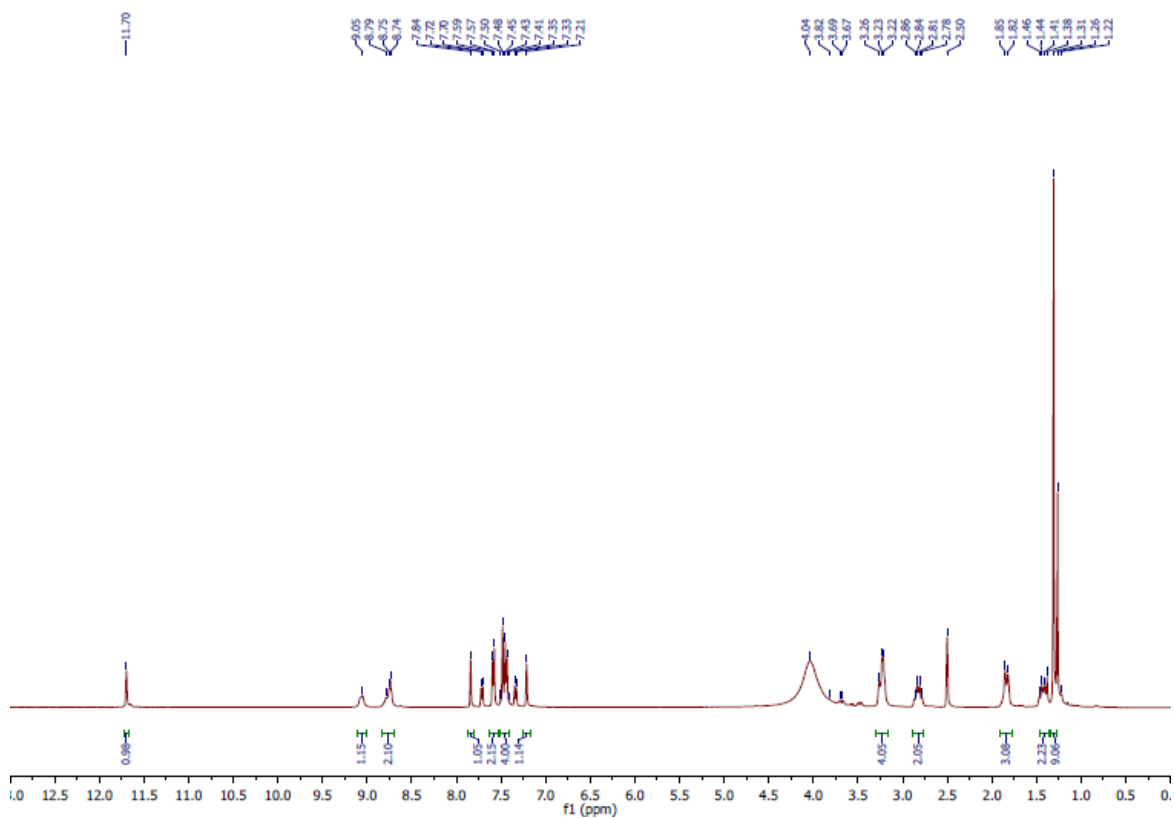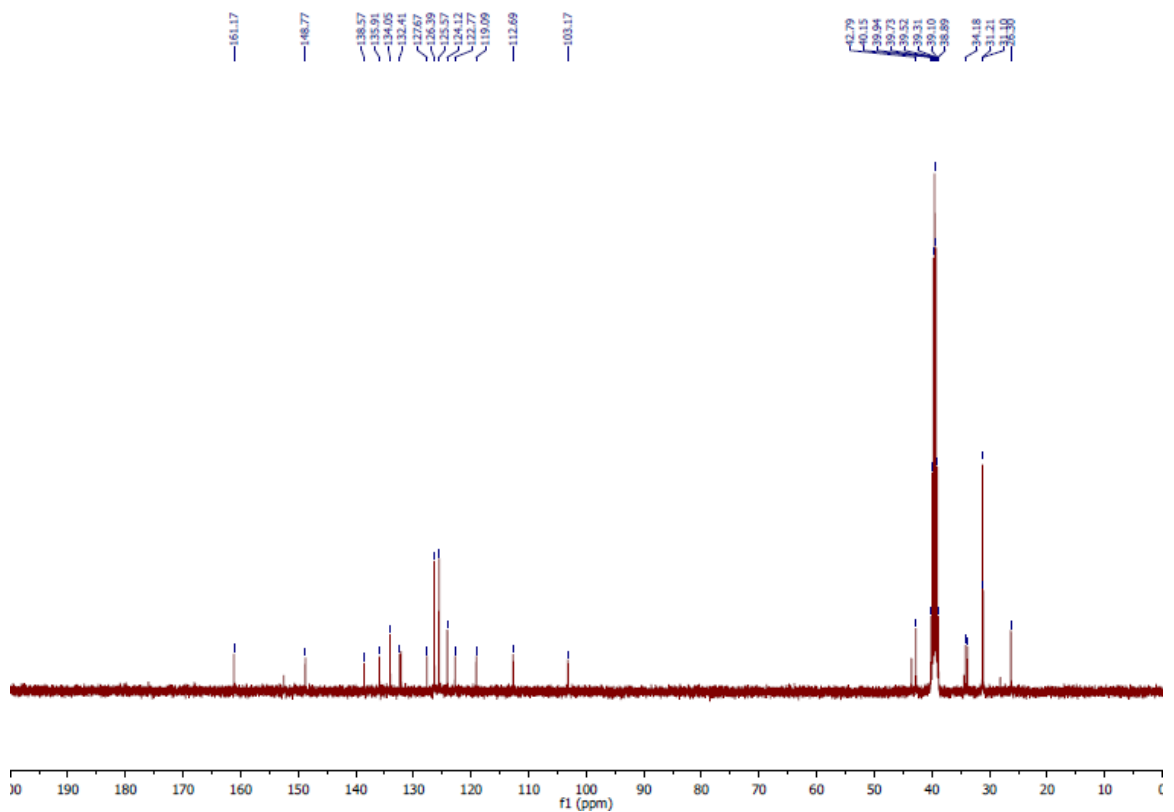



# 7. 6-(4-(Tert-butyl)phenyl)-N-(piperidin-4-ylmethyl)-1H-indole-3-carboxamide Hydrochloride. (7).

z.jd1-70-2h-dms0

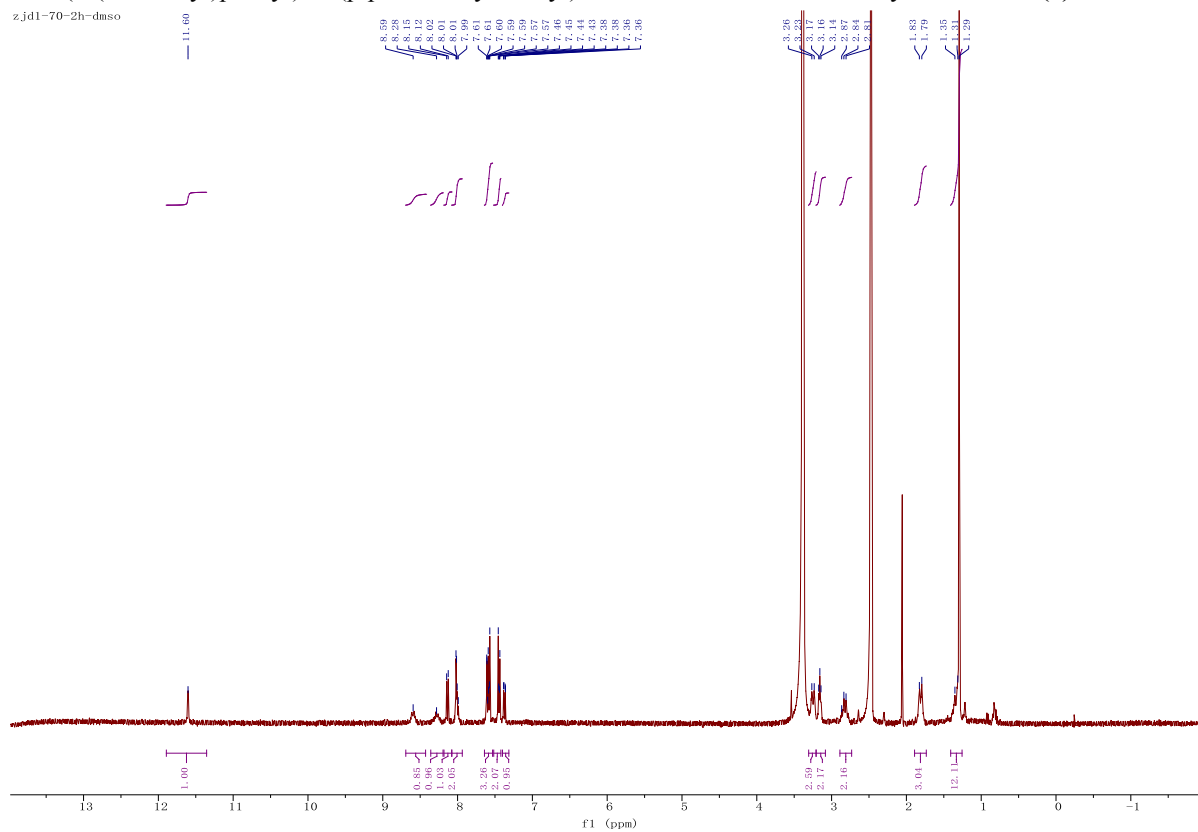

z.jd1-70-2c-dms0

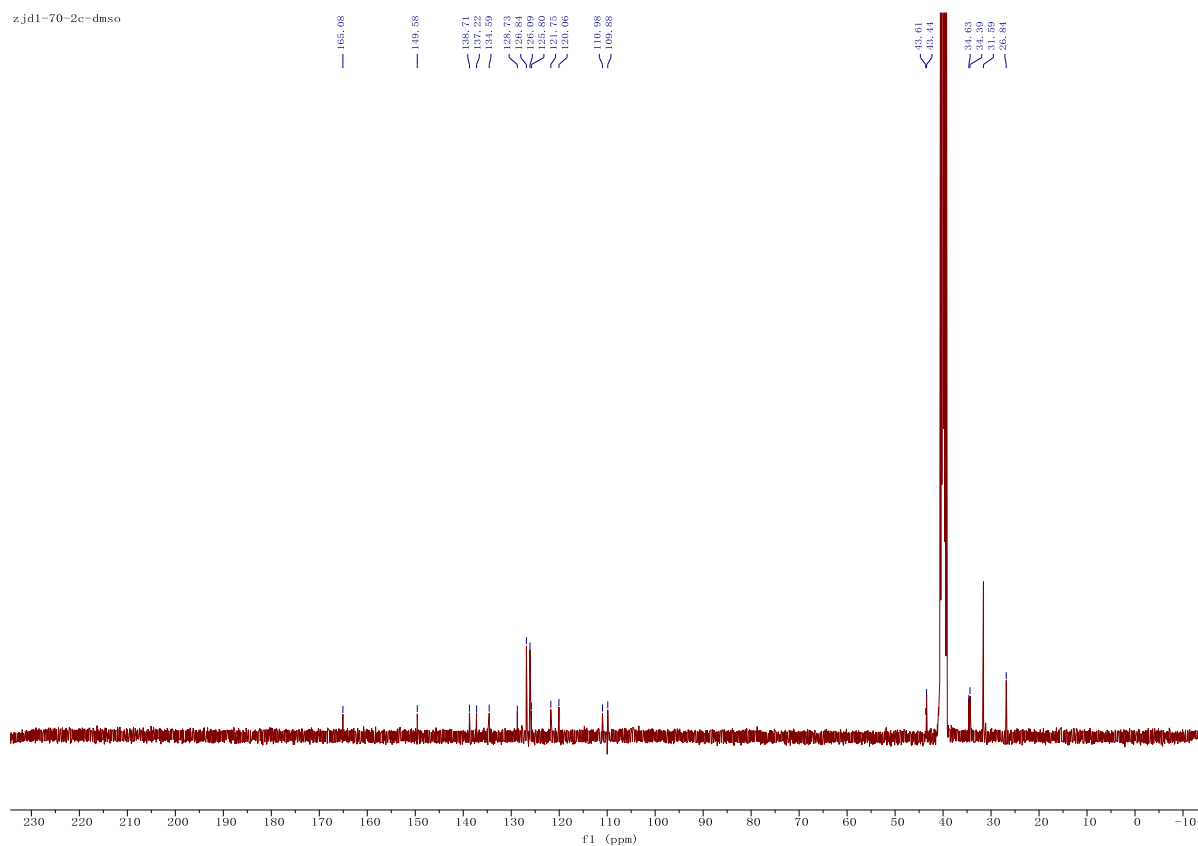

8. 6-(4-(Tert-butyl)phenyl)-N-(piperidin-4-ylmethyl)-1H-indole-2-carboxamide Hydrochloride (**8**).

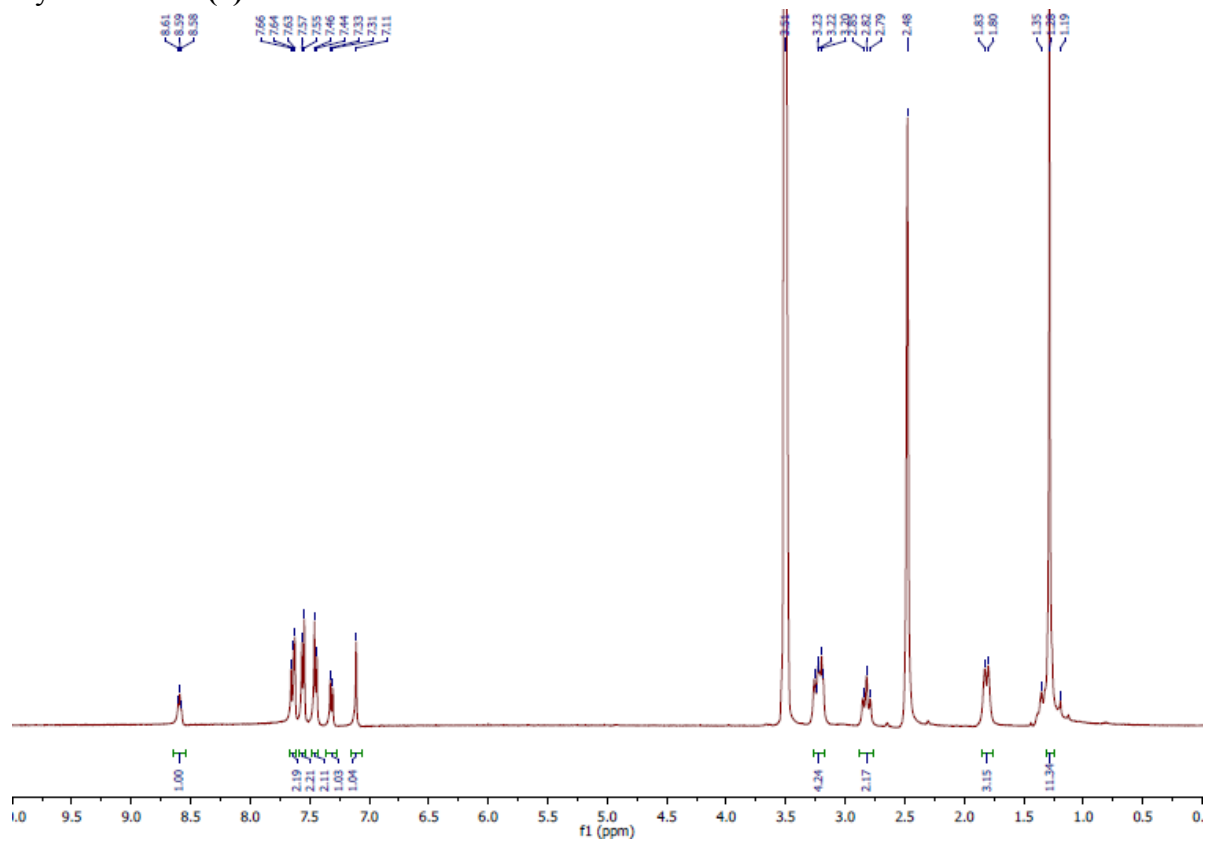

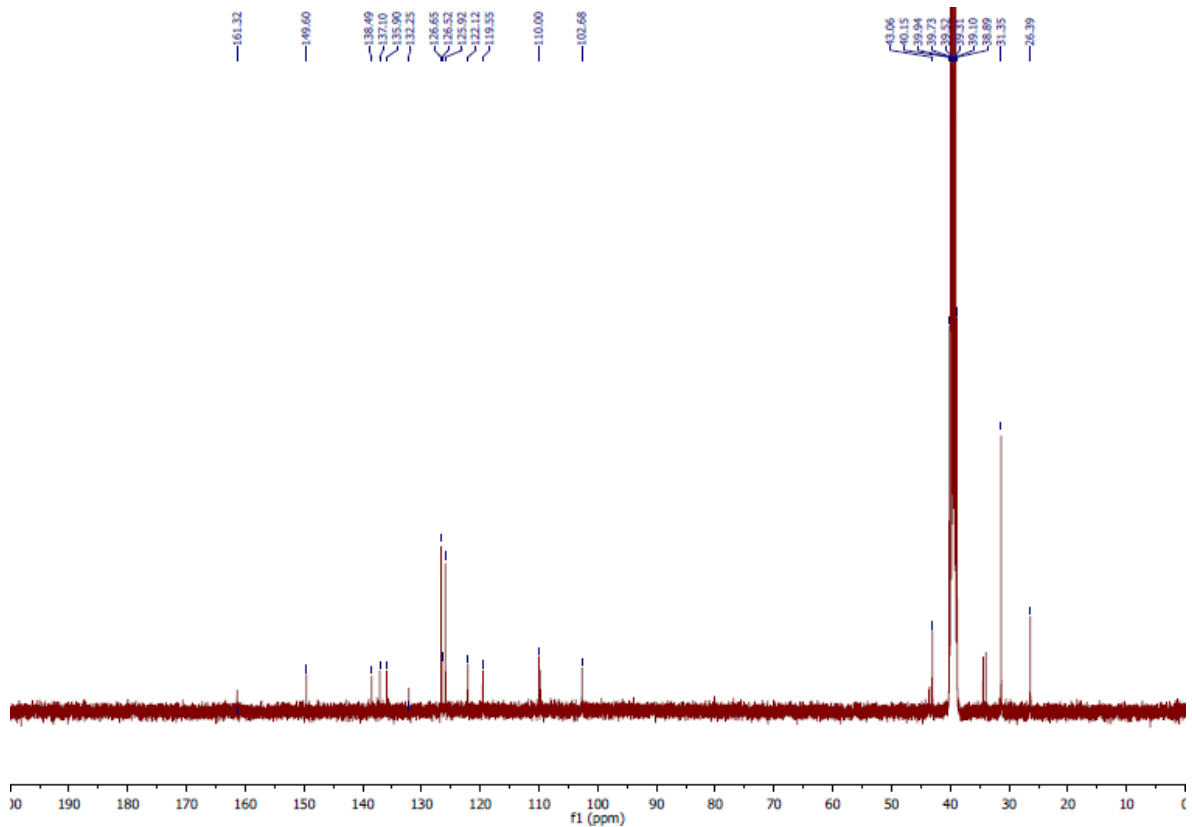

9. 6-(4-(Tert-butyl)phenyl)-N-(piperidin-4-ylmethyl)-1H-pyrrolo[2,3-b]pyridine-3-carboxamide Hydrochloride (9).

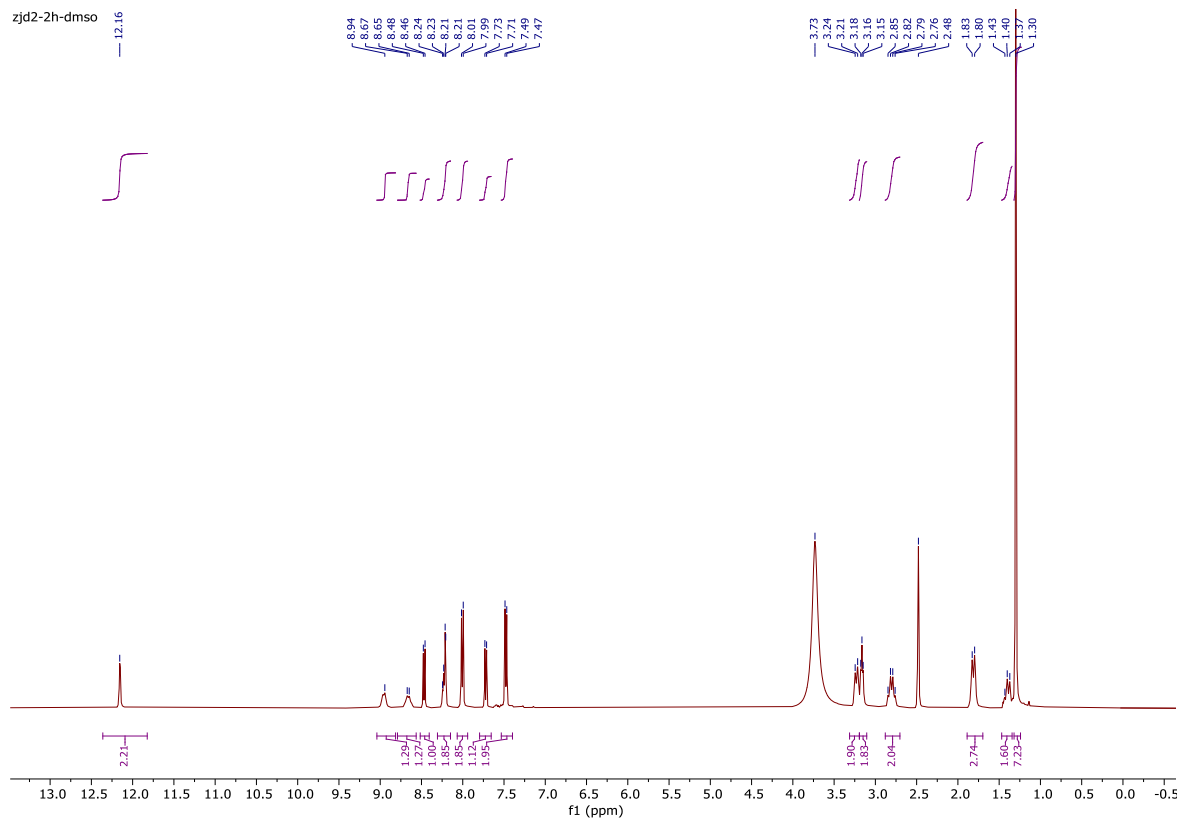

zjd2-2c-dmso

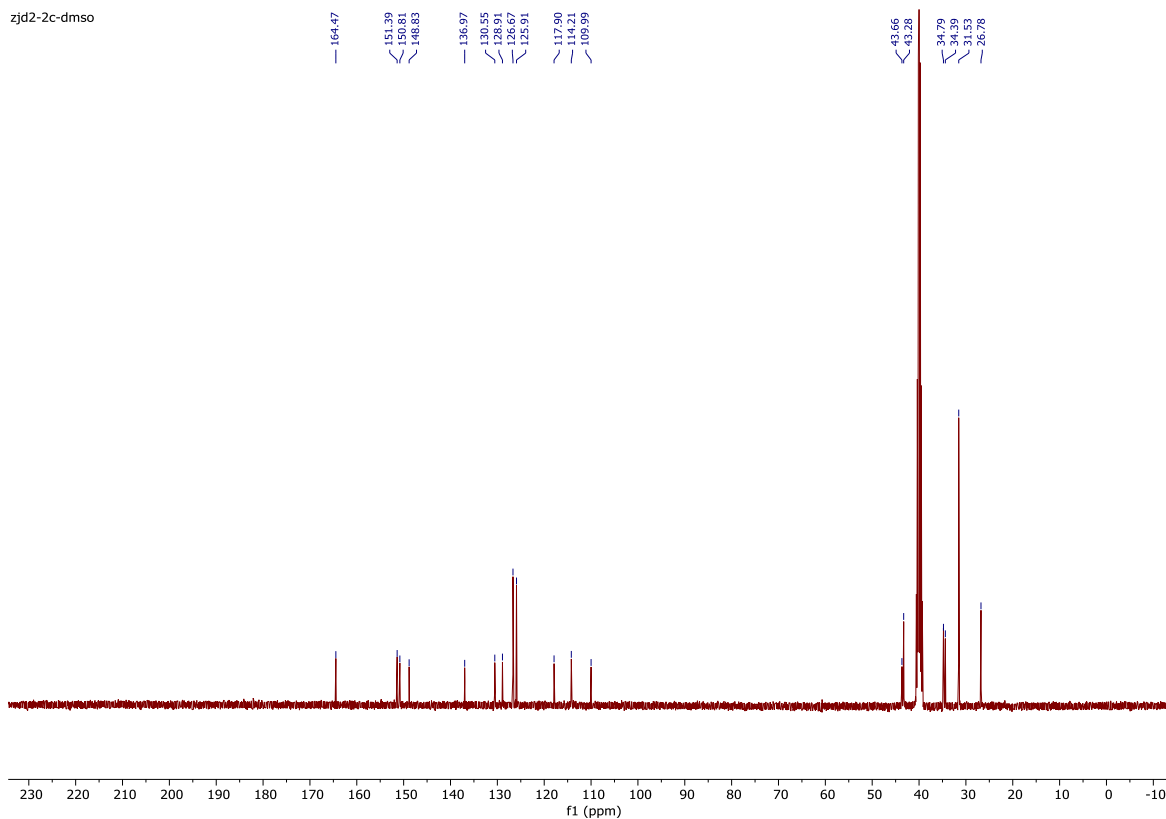

10. 5-(4-(Tert-butyl)phenyl)-N-(piperidin-4-ylmethyl)-1H-benzo[d]imidazole-2 carboxamide Hydrochloride (10).

zjd1860h-dmso

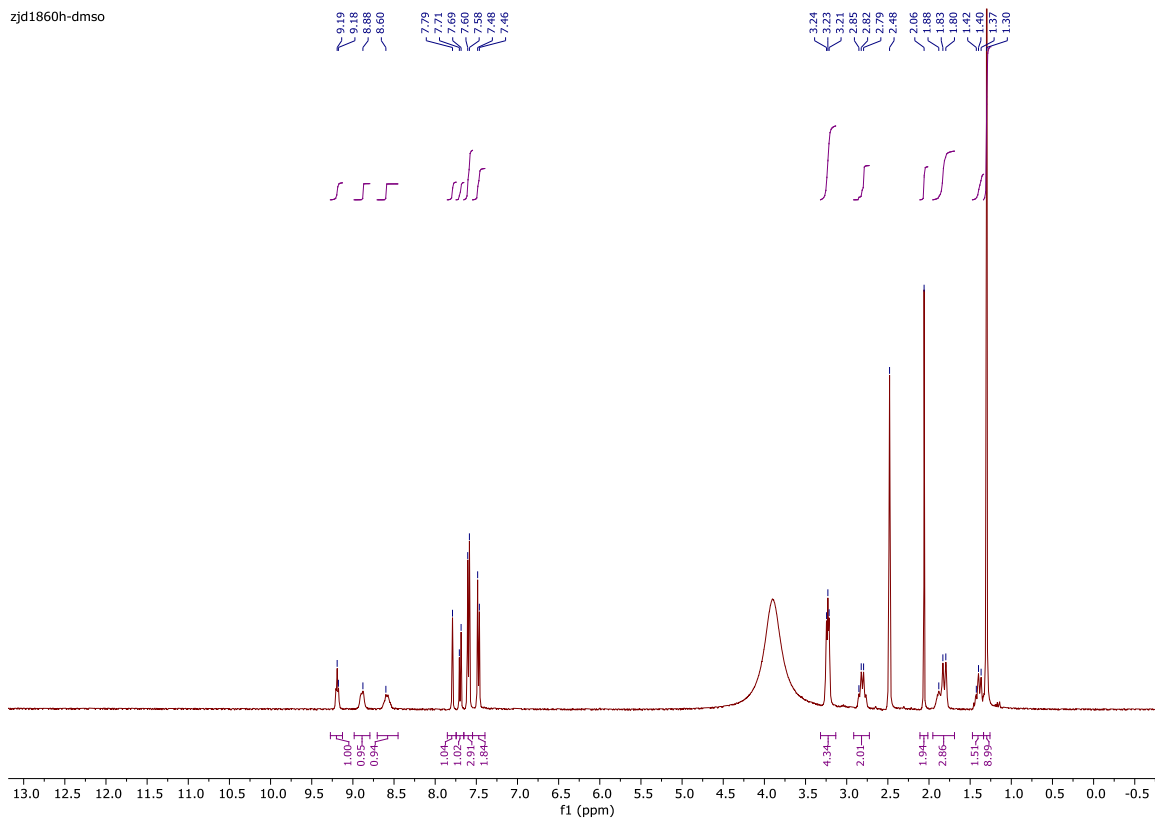

zjd1860c-dmso

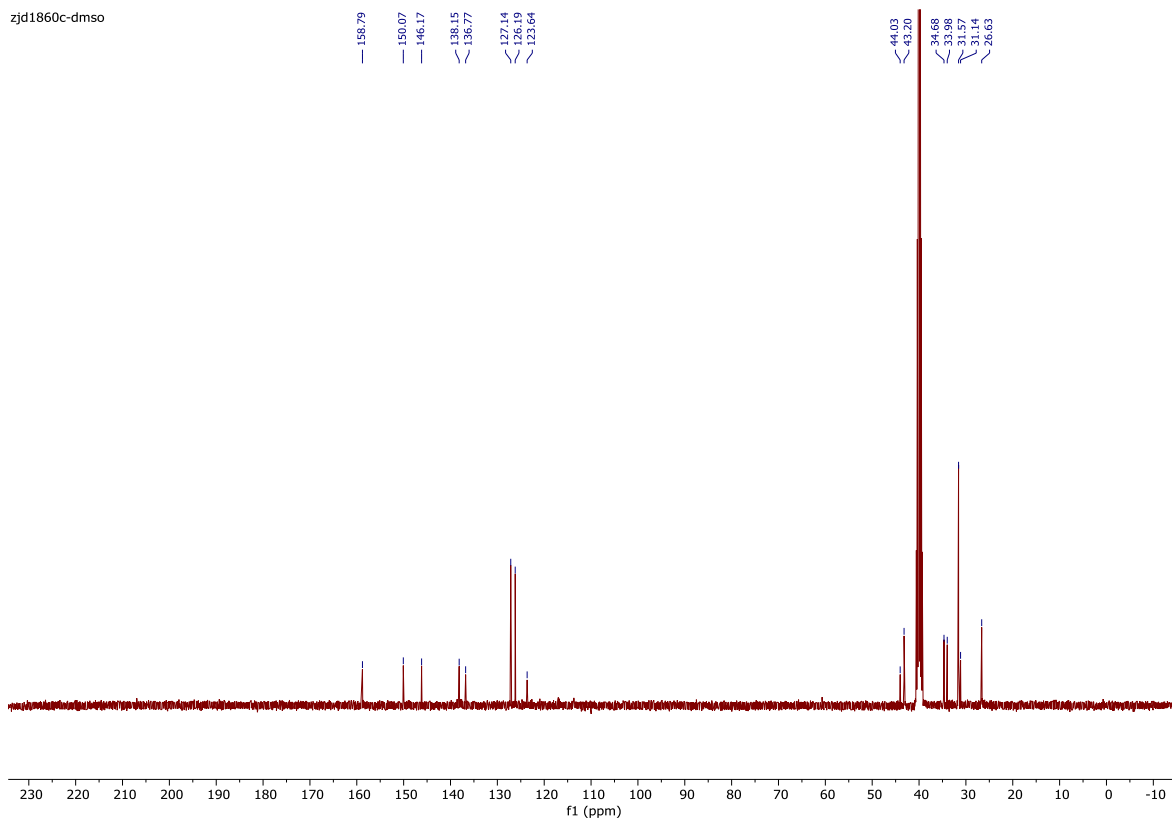

11.5-(4-(tert-butyl)phenyl)-N-(piperidin-4-yl)benzo[b]thiophene-2-carboxamide Hydrochloride (**11**)

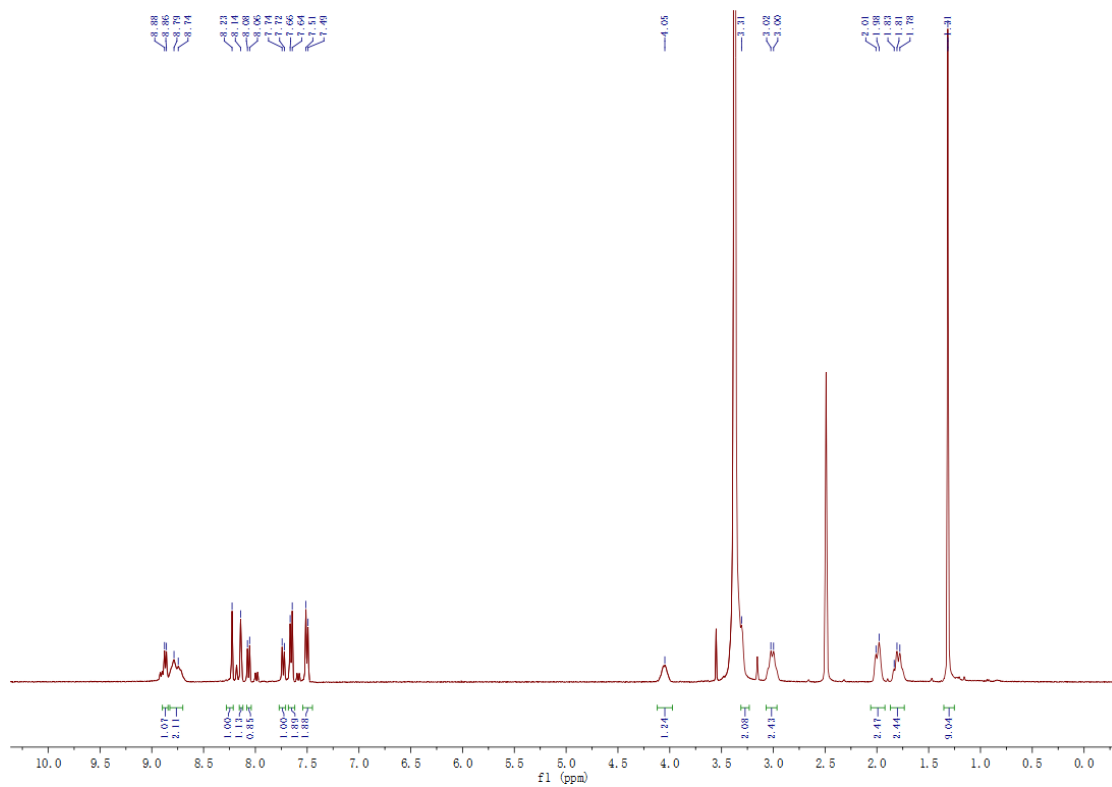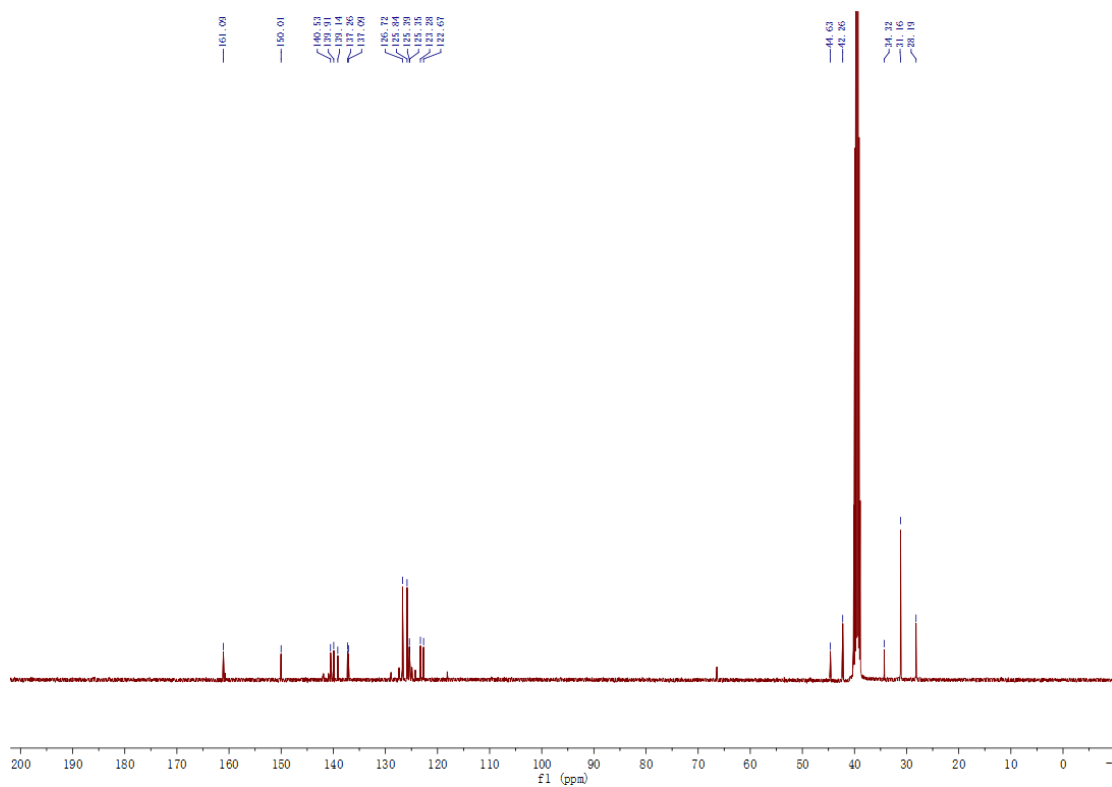

12. 6-(4-(tert-butyl)phenyl)-N-(piperidin-4-yl)benzo[b]thiophene-2-carboxamide Hydrochloride (**12**)

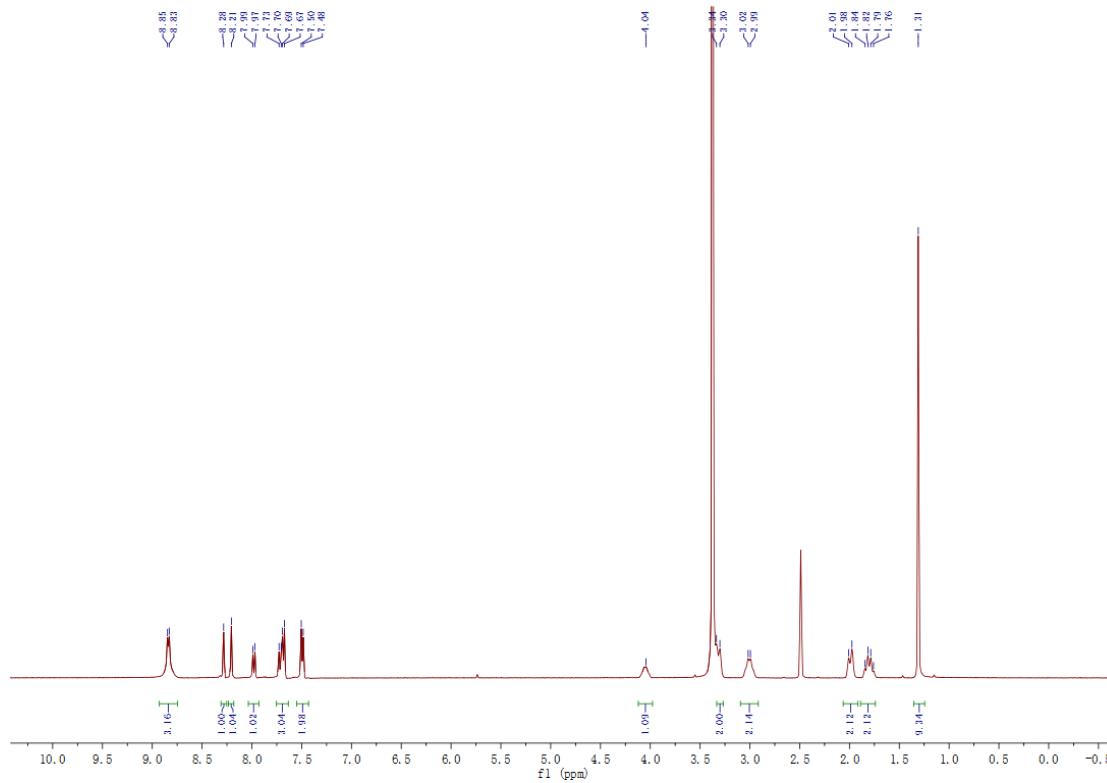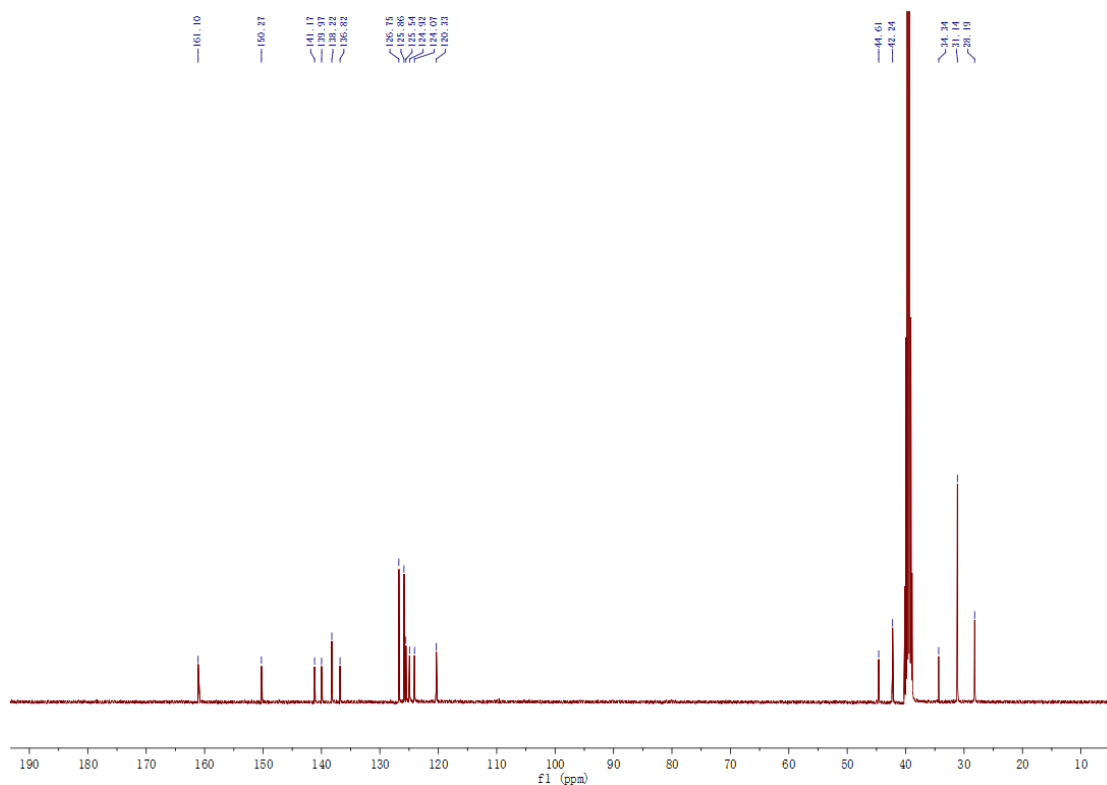

13. 6-(4-(Tert-butyl)phenyl)-N-(piperidin-4-yl)benzofuran-3-carboxamide Hydrochloride (13)

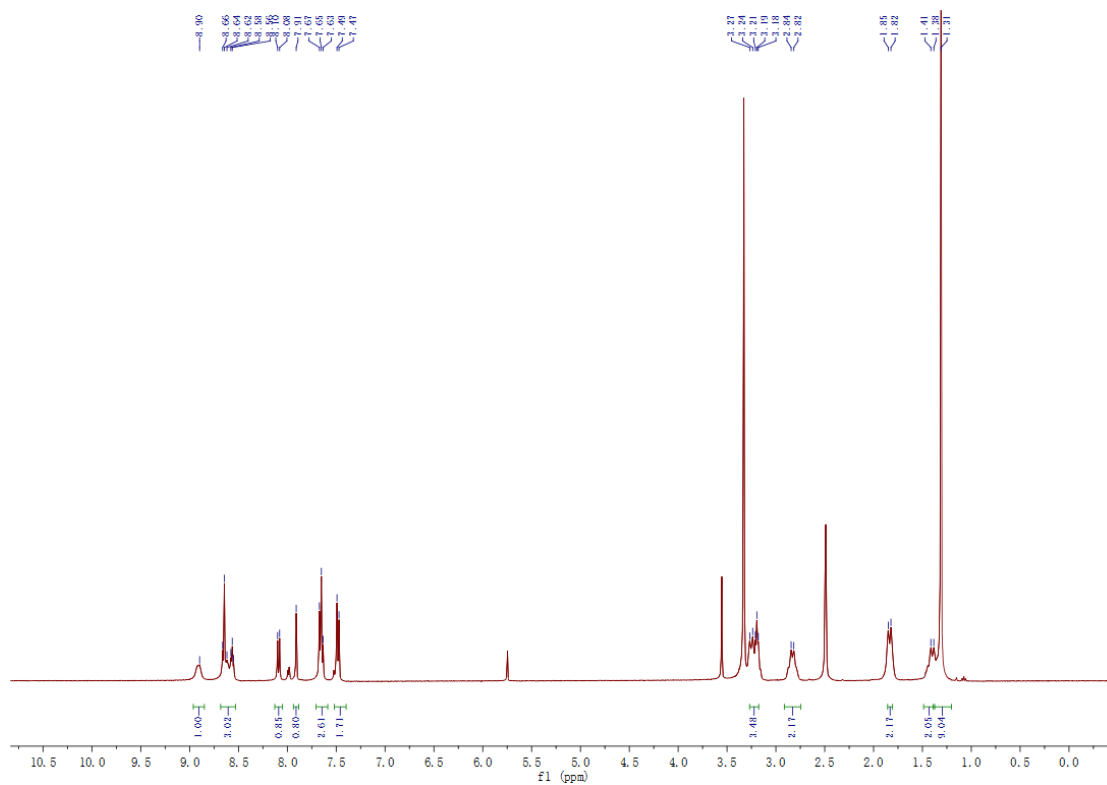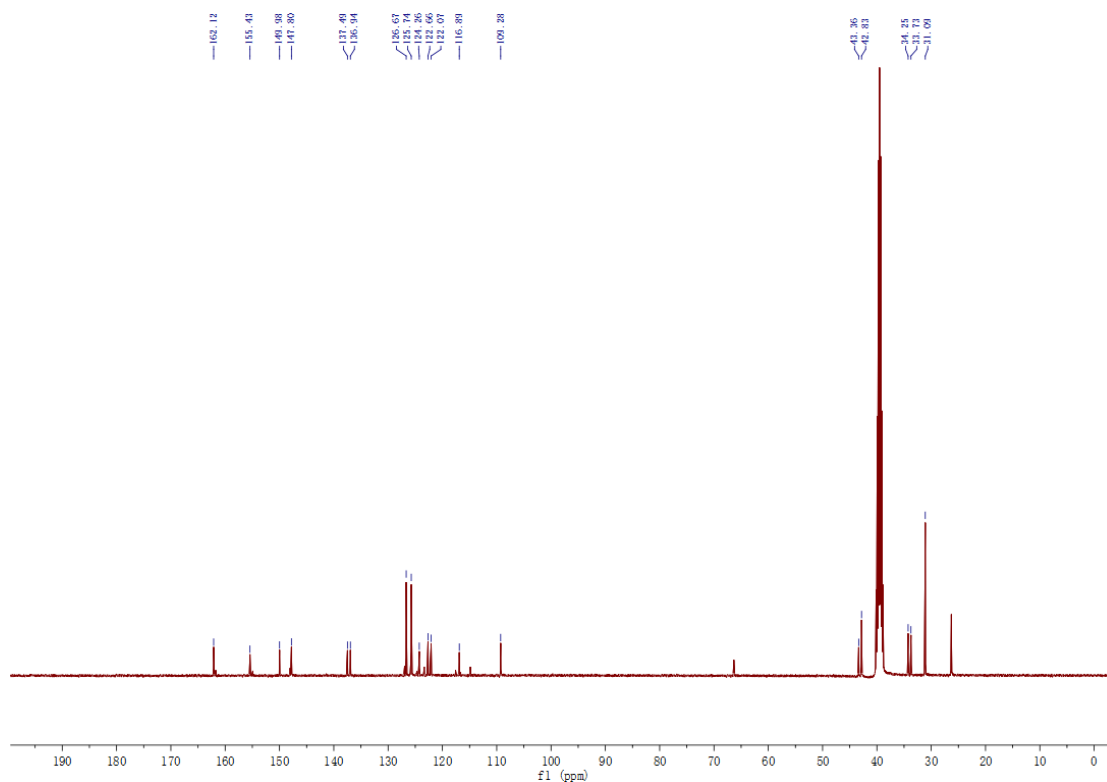



14. 14. 5-(4-Cyanophenyl)-N-(piperidin-4-yl)-1H-indole-3-carboxamide Hydrochloride (14).

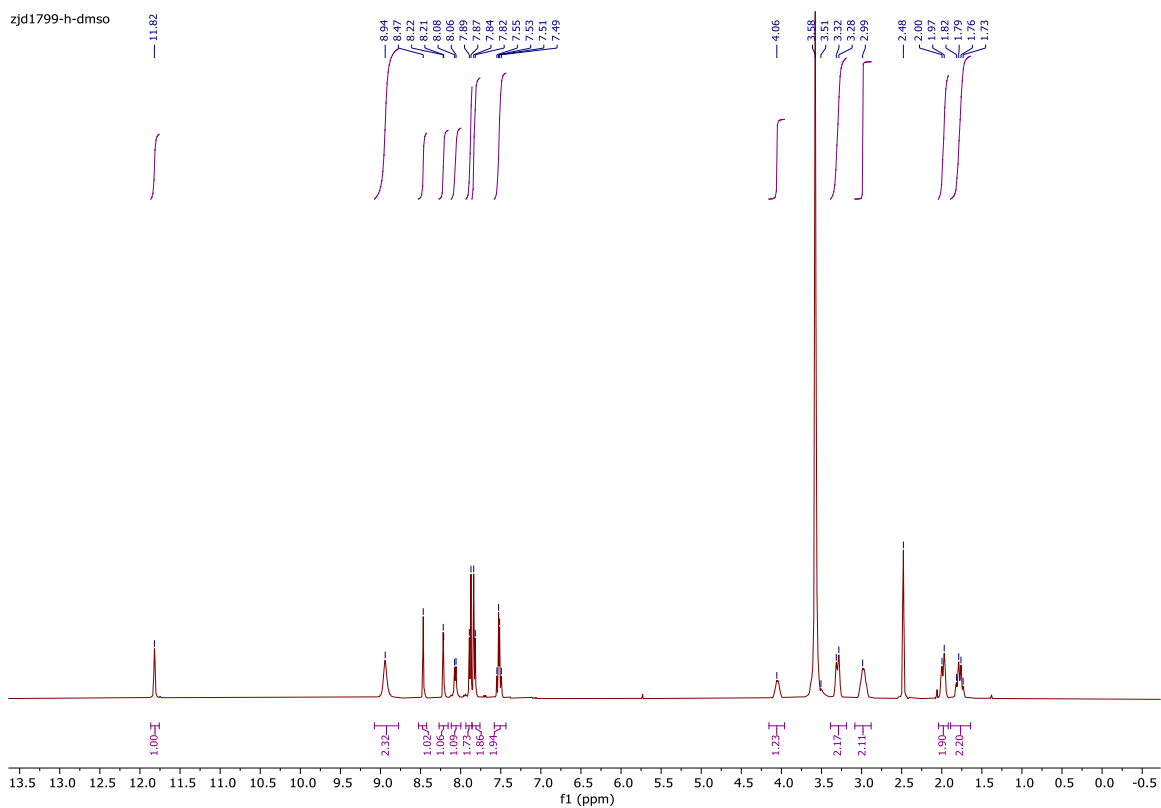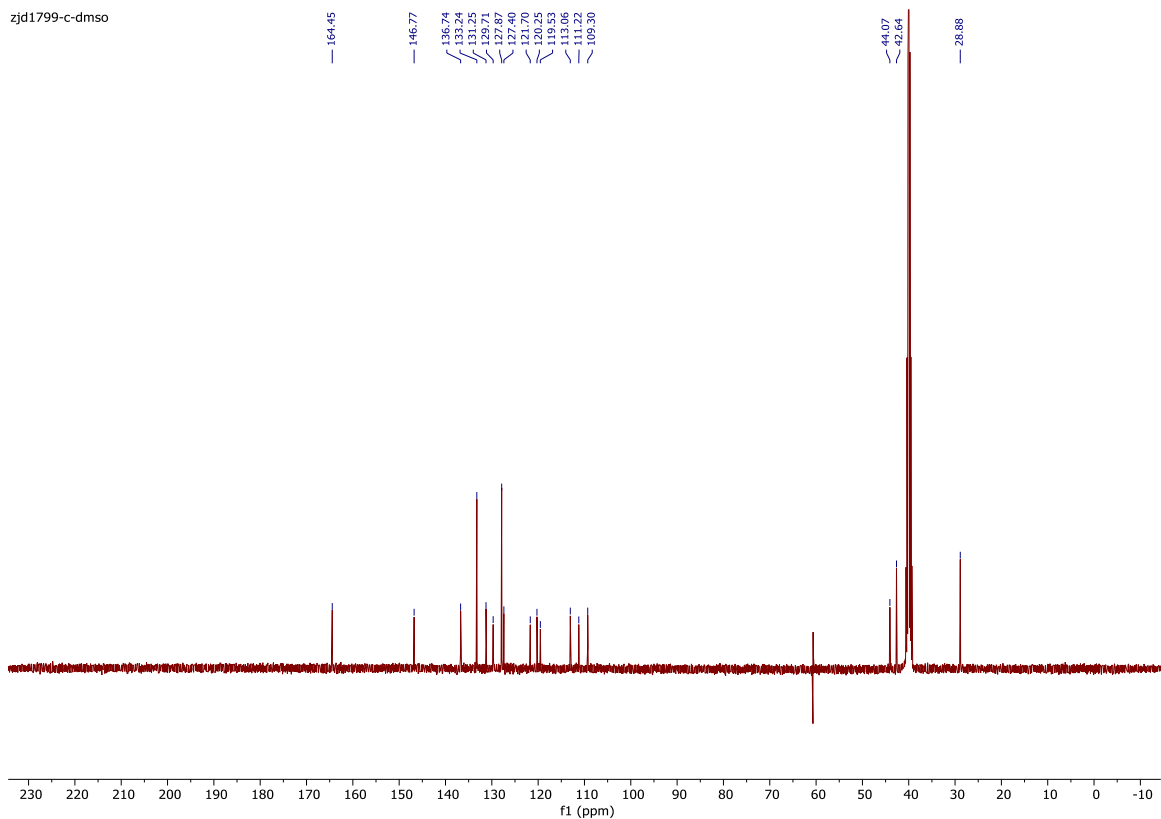

15. N-(Piperidin-4-yl)-5-(3,4,5-trimethoxyphenyl)-1H-indole-3-carboxamide Hydrochloride (15).

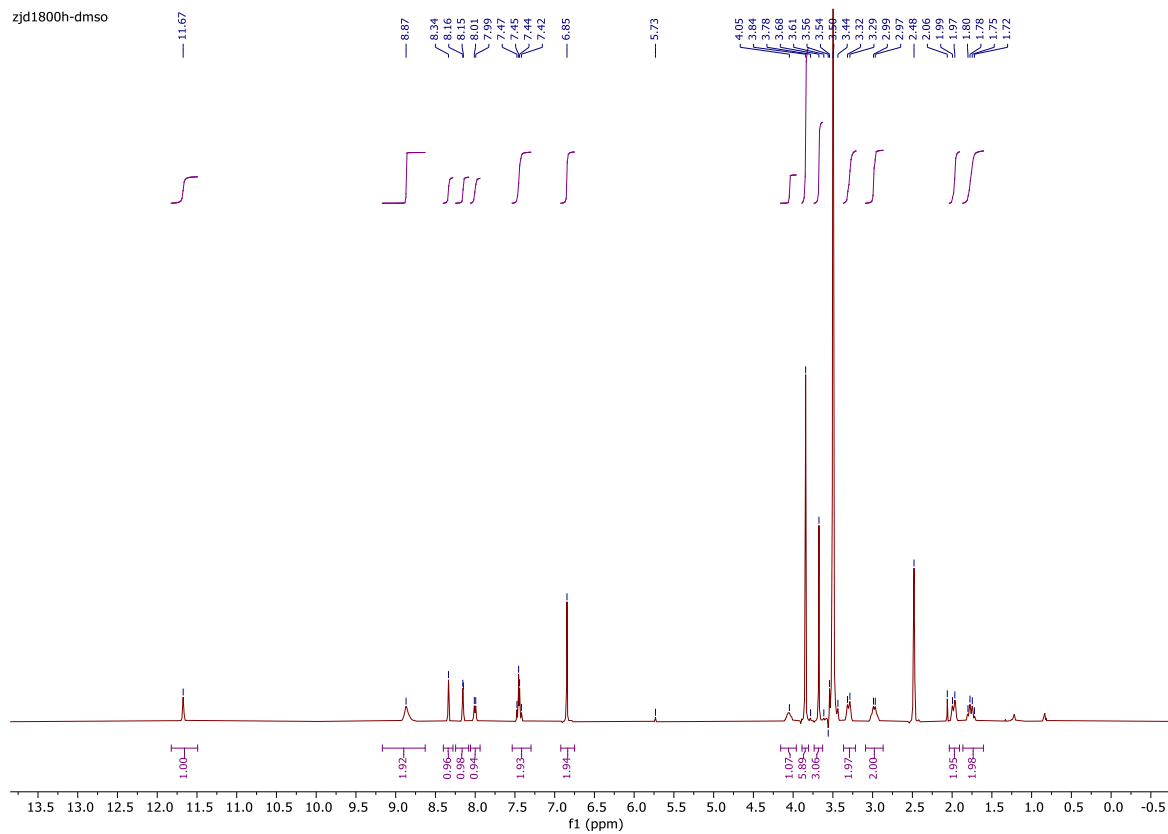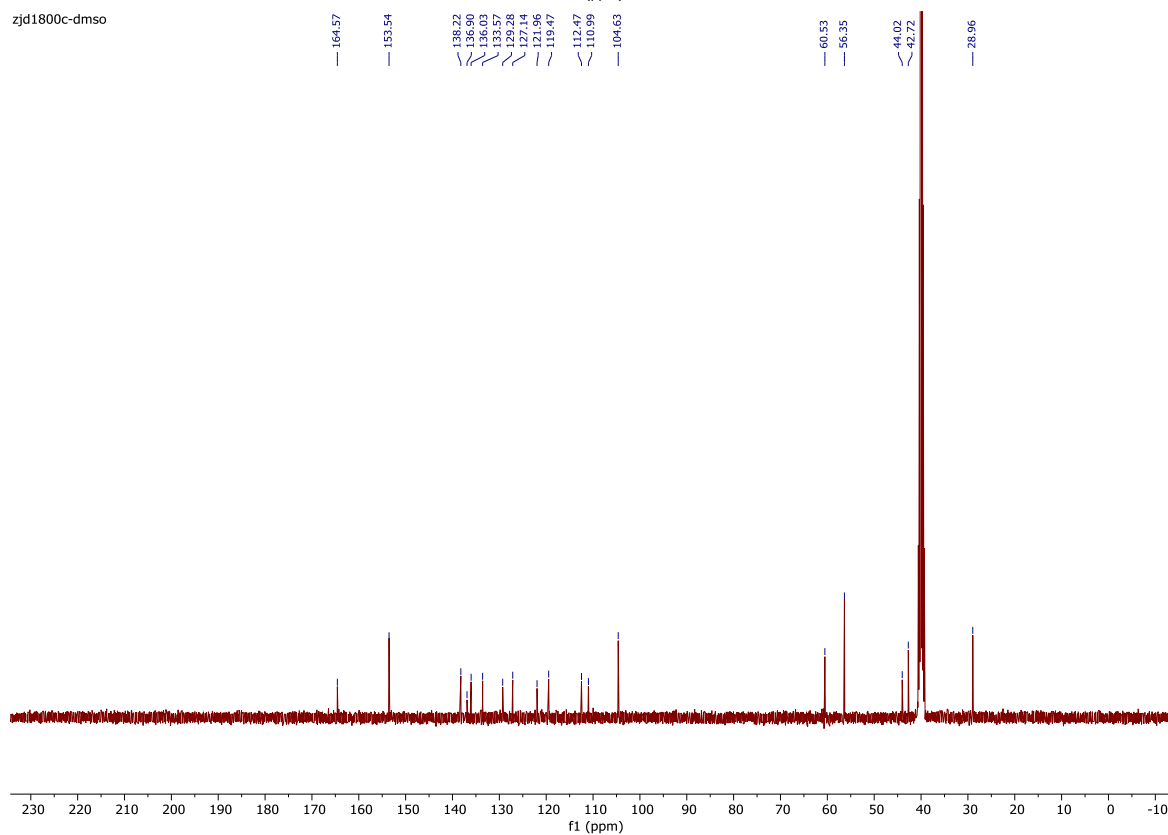

16. 5-(4-Fluorophenyl)-N-(piperidin-4-ylmethyl)-1H-indole-3-carboxamide Hydrochloride (**16**).

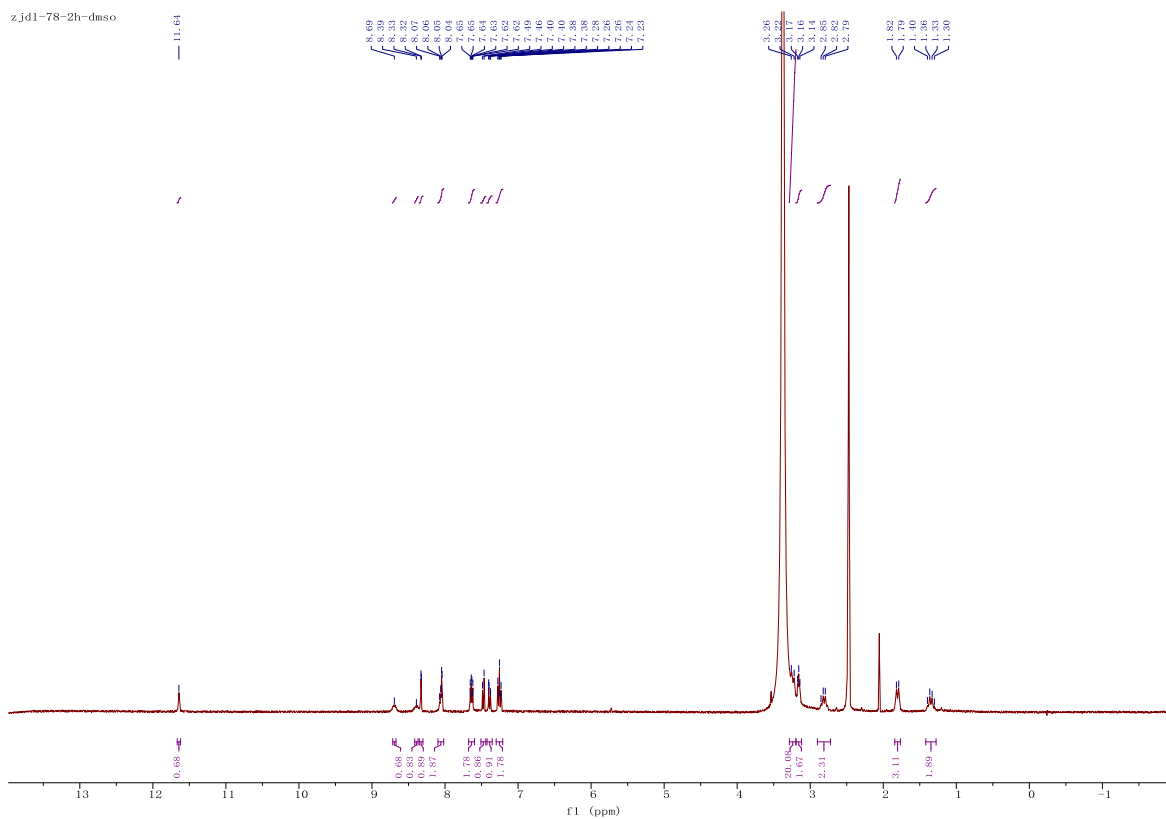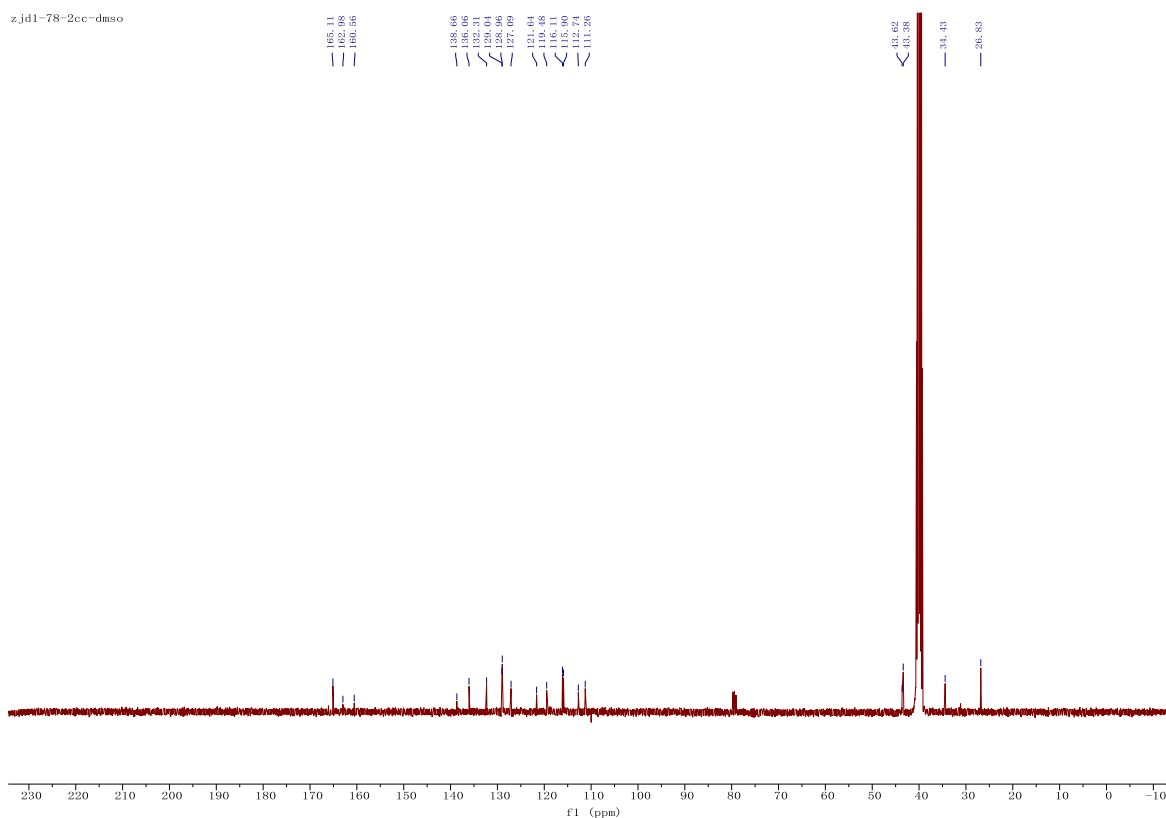

17. 5-(2,4-Difluorophenyl)-N-(piperidin-4-ylmethyl)-1H-indole-3-carboxamide Hydrochloride (17).



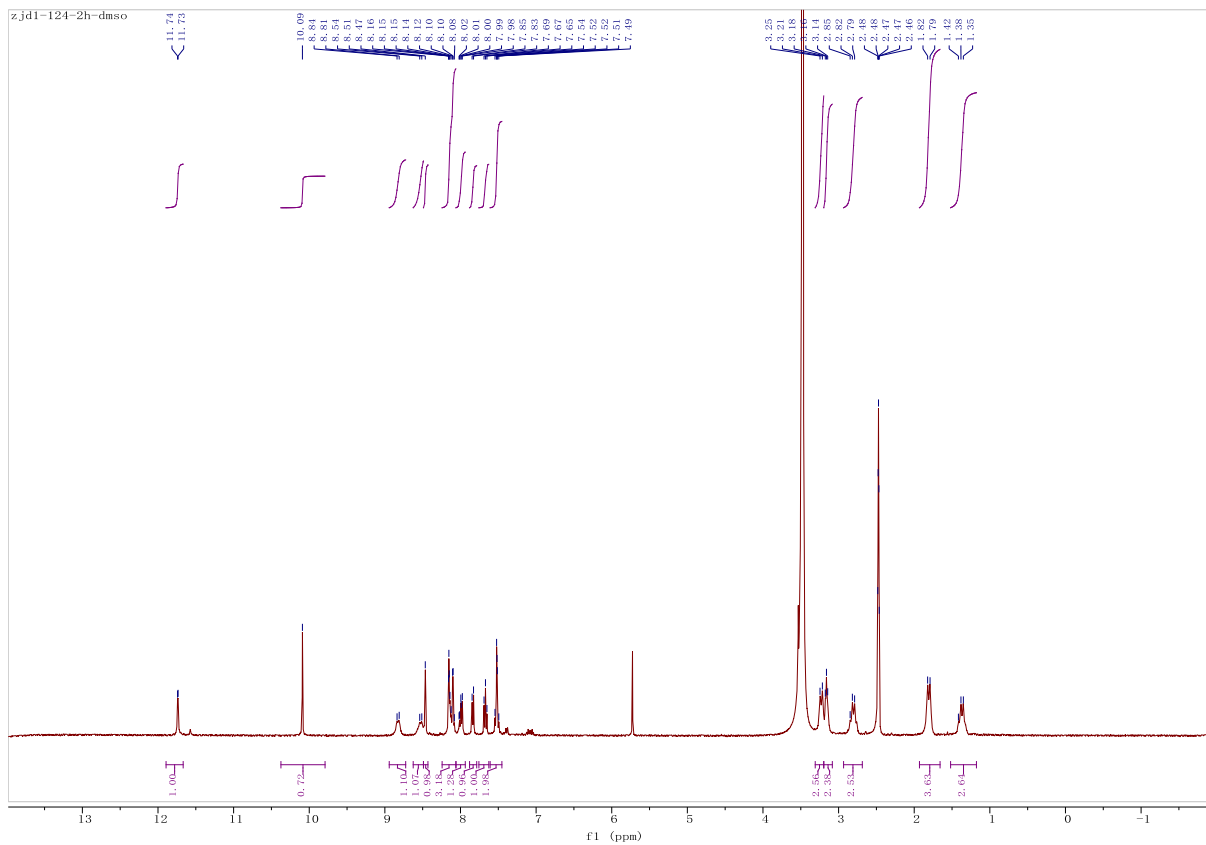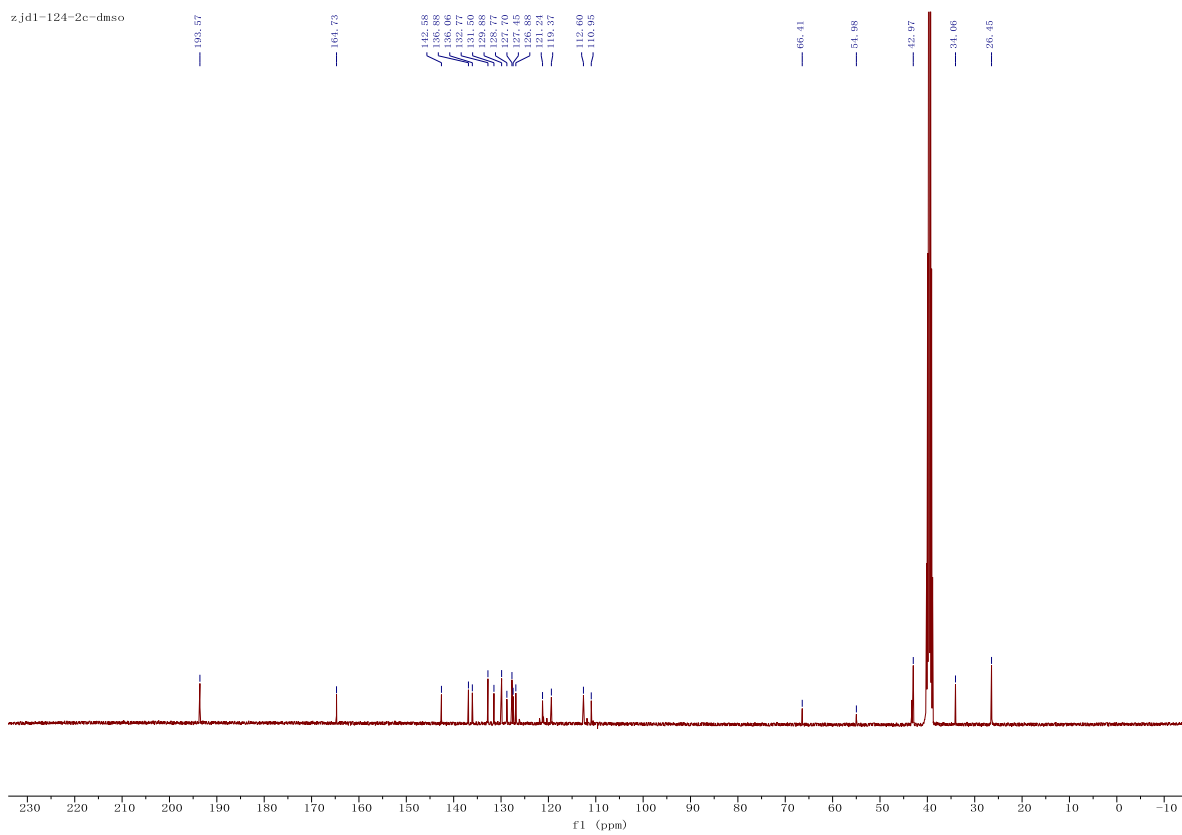

19. N-(Piperidin-4-ylmethyl)-6-(3,4,5-trimethoxyphenyl)-1H-indole-3-carboxamide Hydrochloride (19).

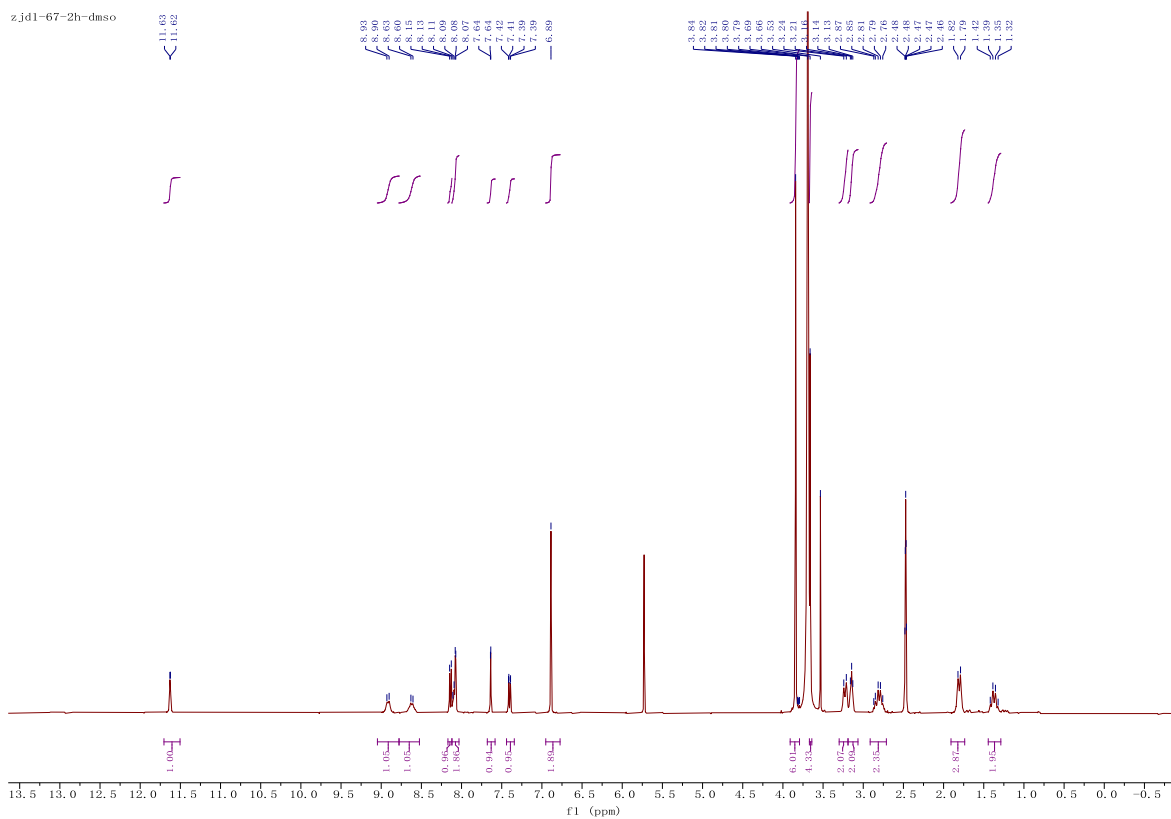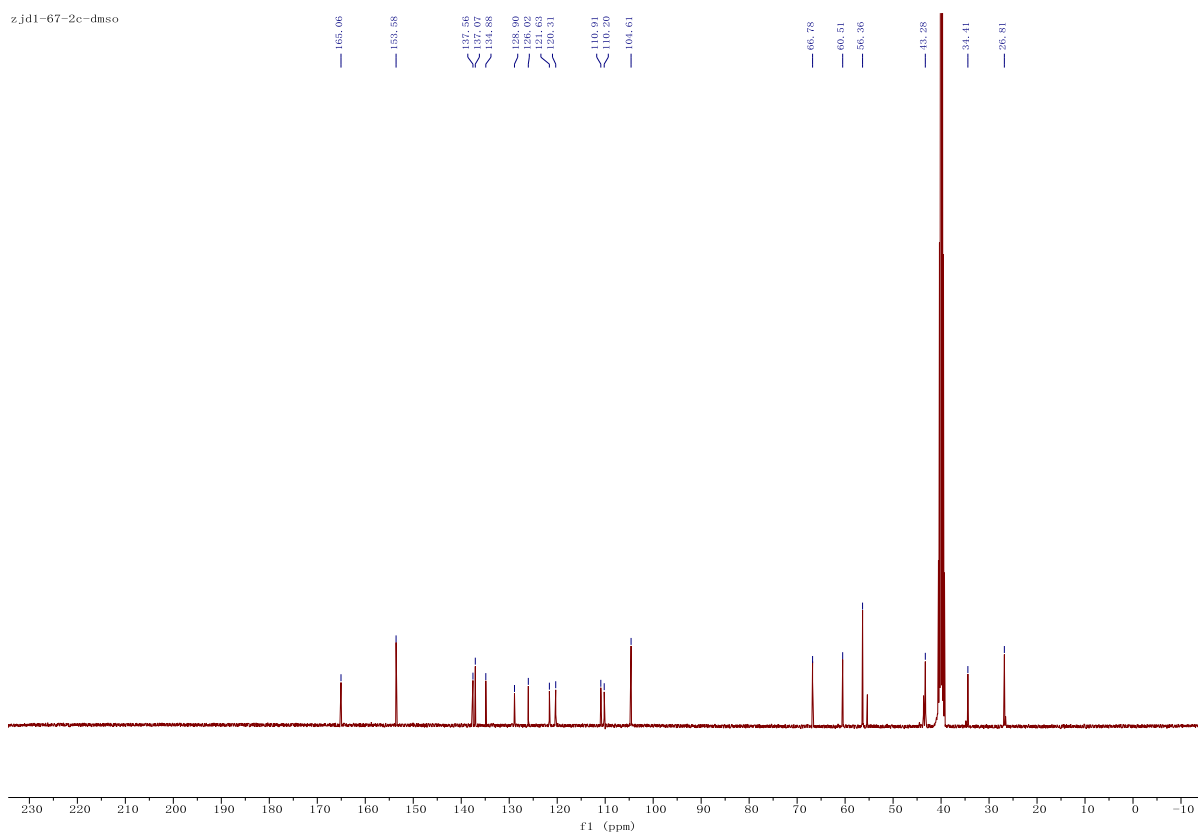

20. 6-(4-Fluorophenyl)-N-(piperidin-4-ylmethyl)-1H-indole-3-carboxamide Hydrochloride (20).

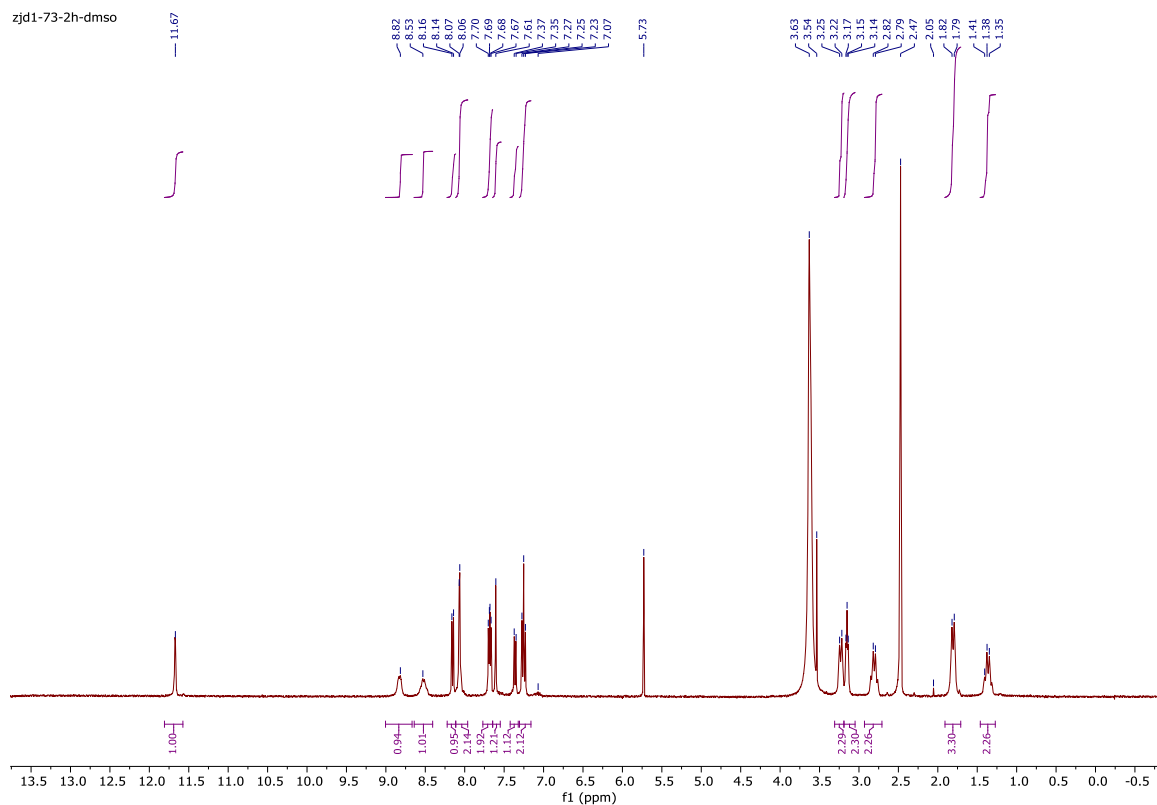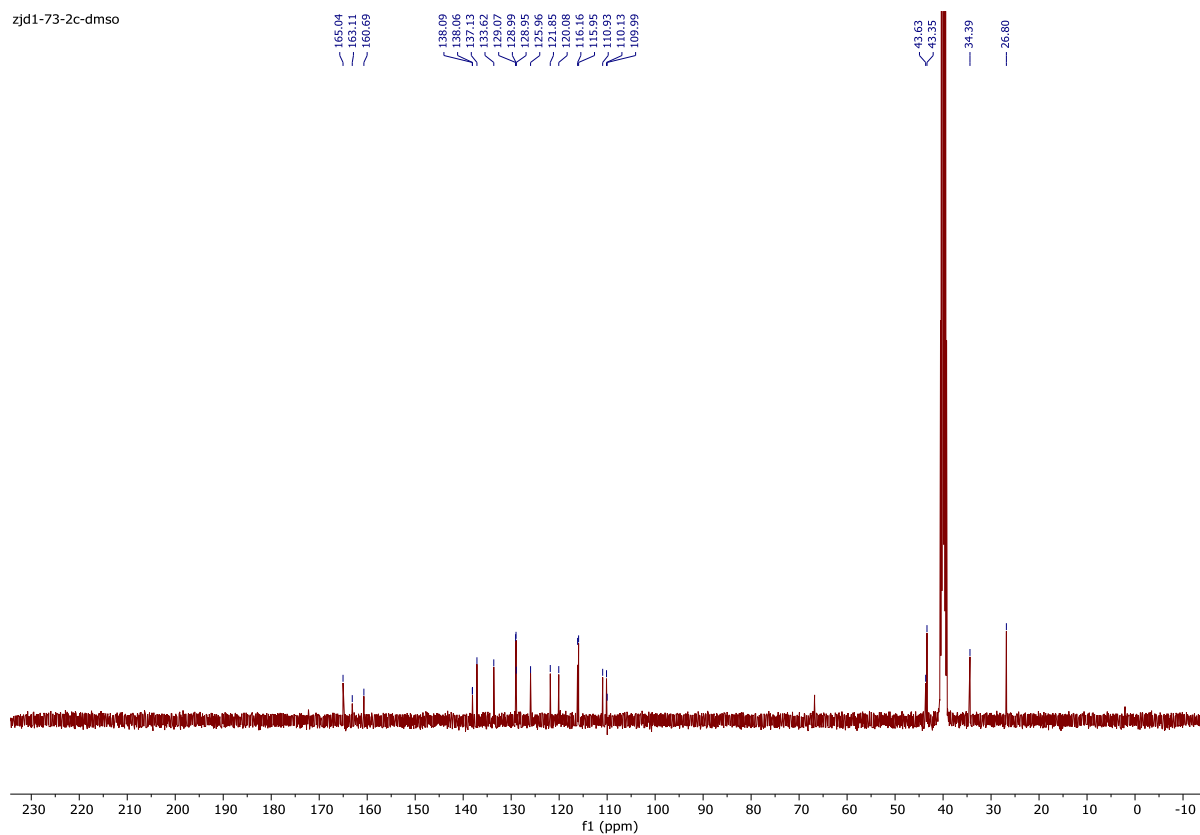

21. 6-(2-Fluorophenyl)-N-(piperidin-4-ylmethyl)-1H-indole-3-carboxamide Hydrochloride (21).





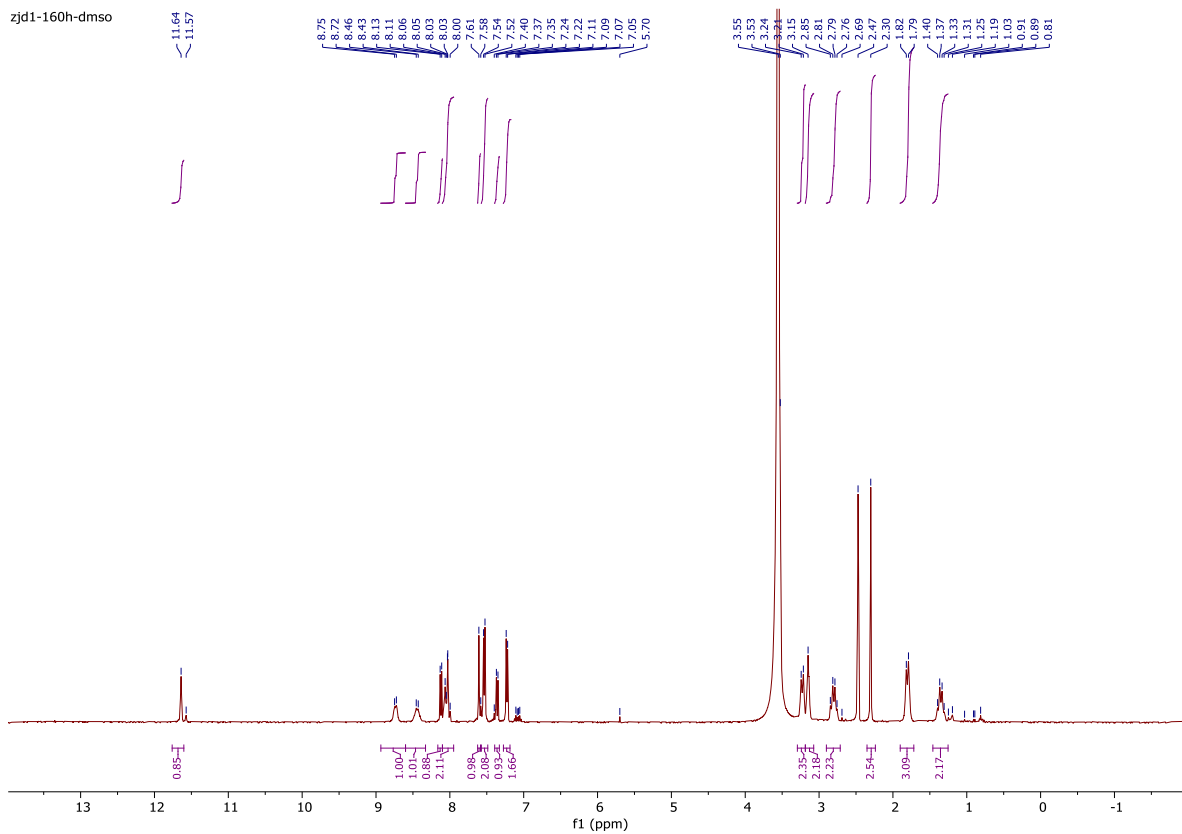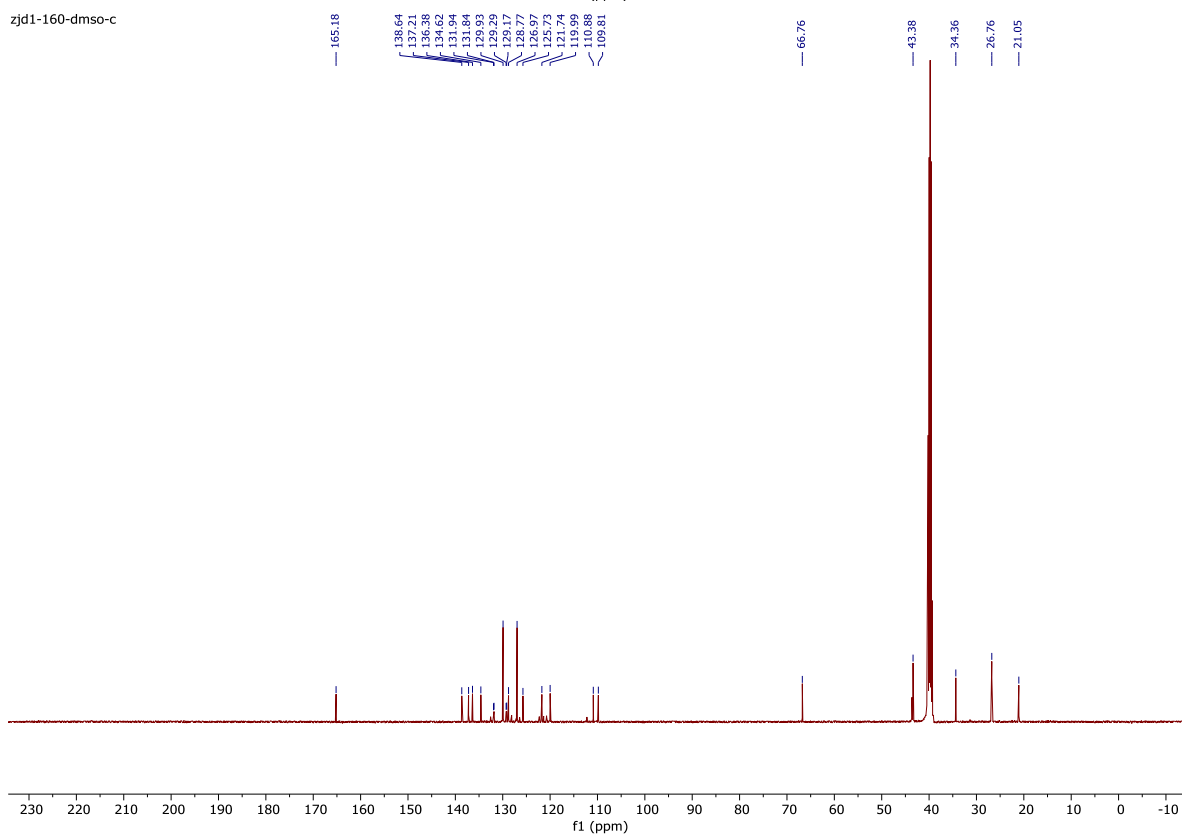

23. 6-(4-(Aminomethyl)phenyl)-N-(piperidin-4-ylmethyl)-1H-indole-3-carboxamide Hydrochloride (**23**).

x1-syc-1859

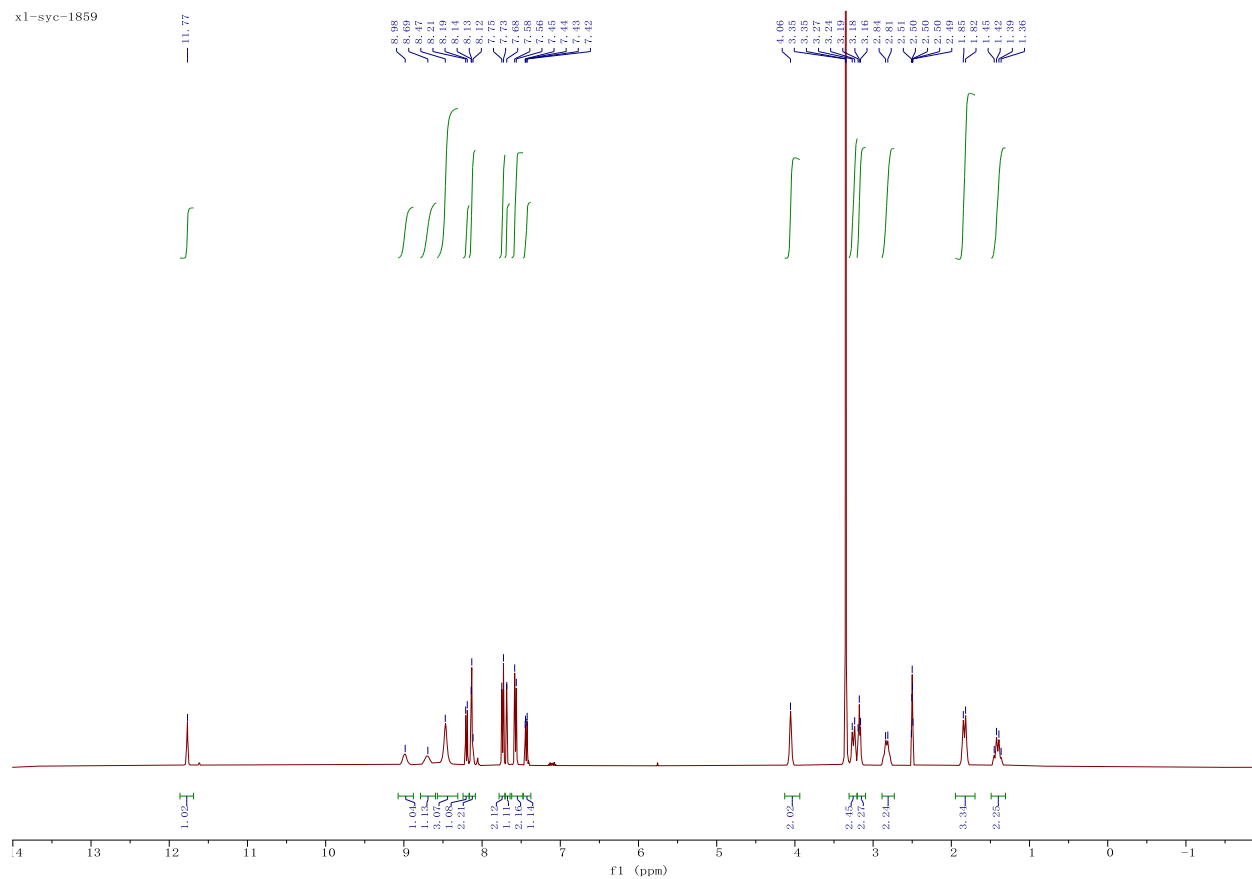

zjd1-163c-dmso

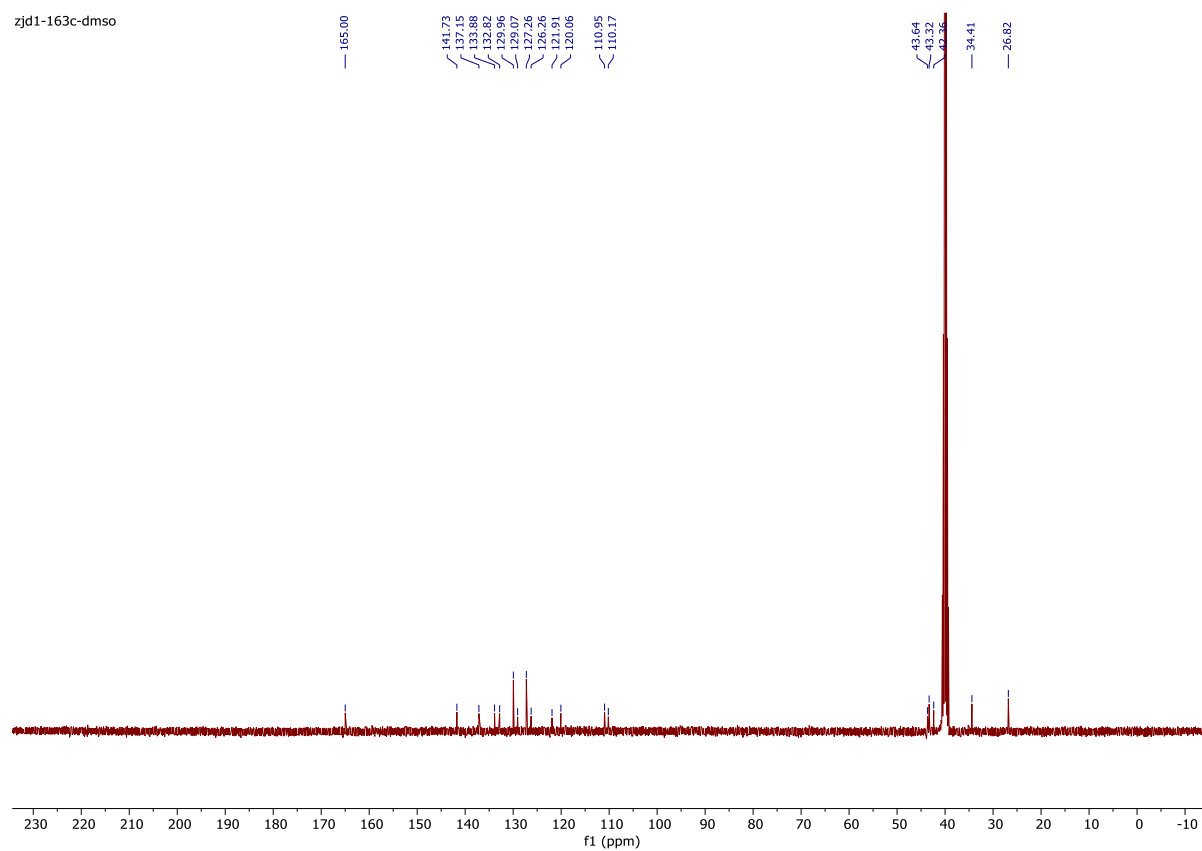

24. 6-(4-Cyanophenyl)-N-(piperidin-4-ylmethyl)-1H-indole-3-carboxamide Hydrochloride (24).

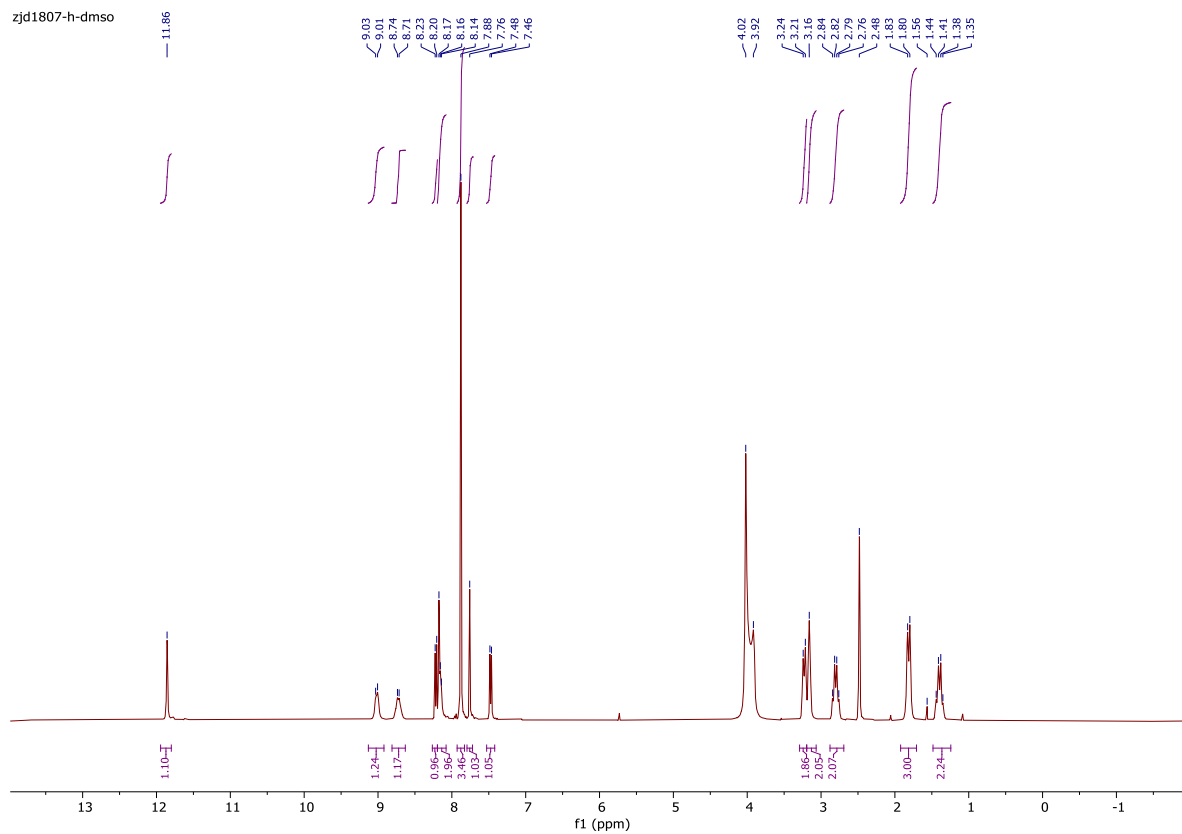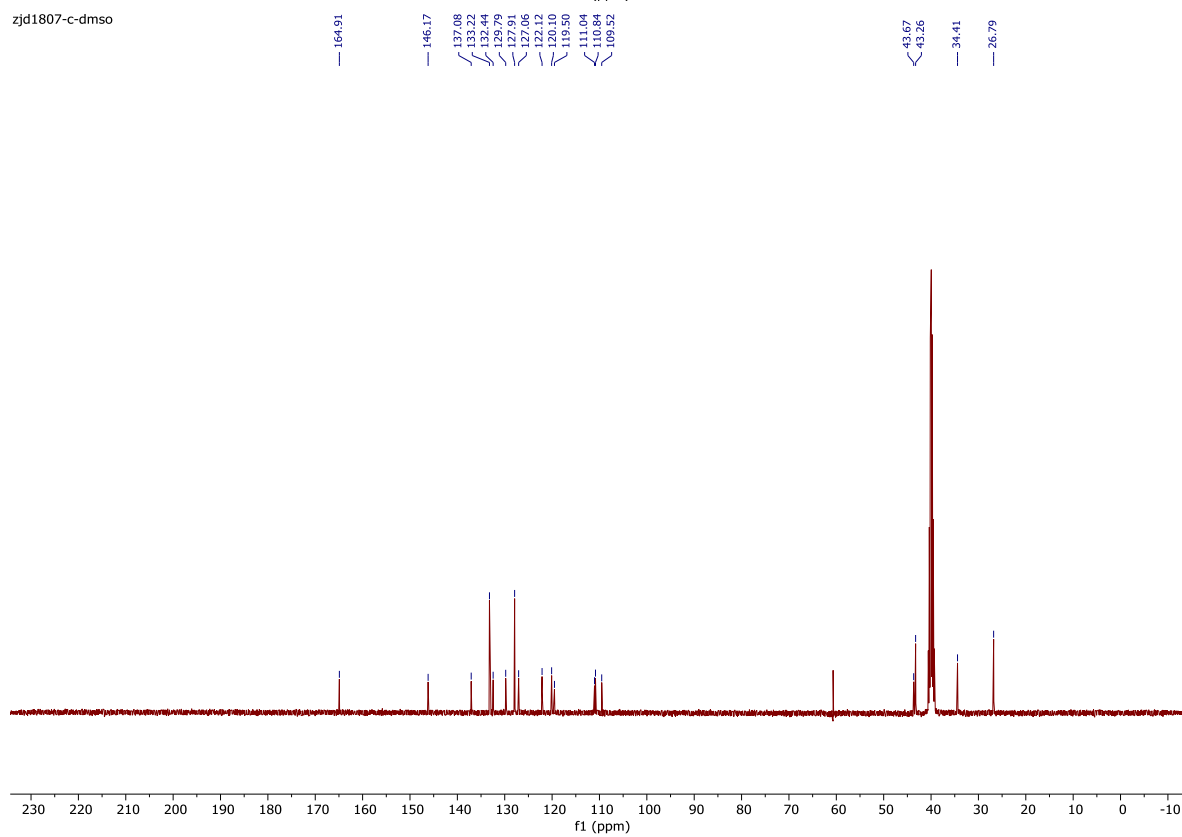

25. 6-([1,1'-Biphenyl]-4-yl)-N-(piperidin-4-ylmethyl)-1H-indole-3-carboxamide Hydrochloride (25).

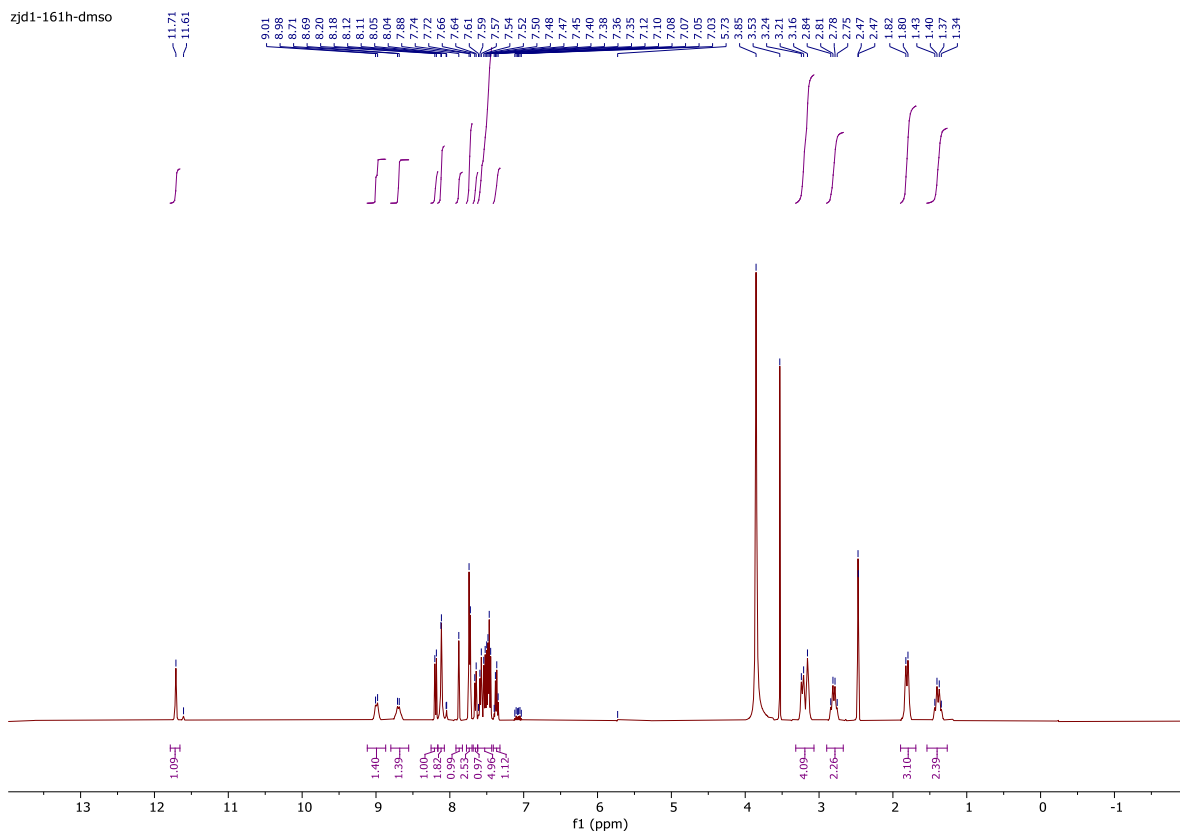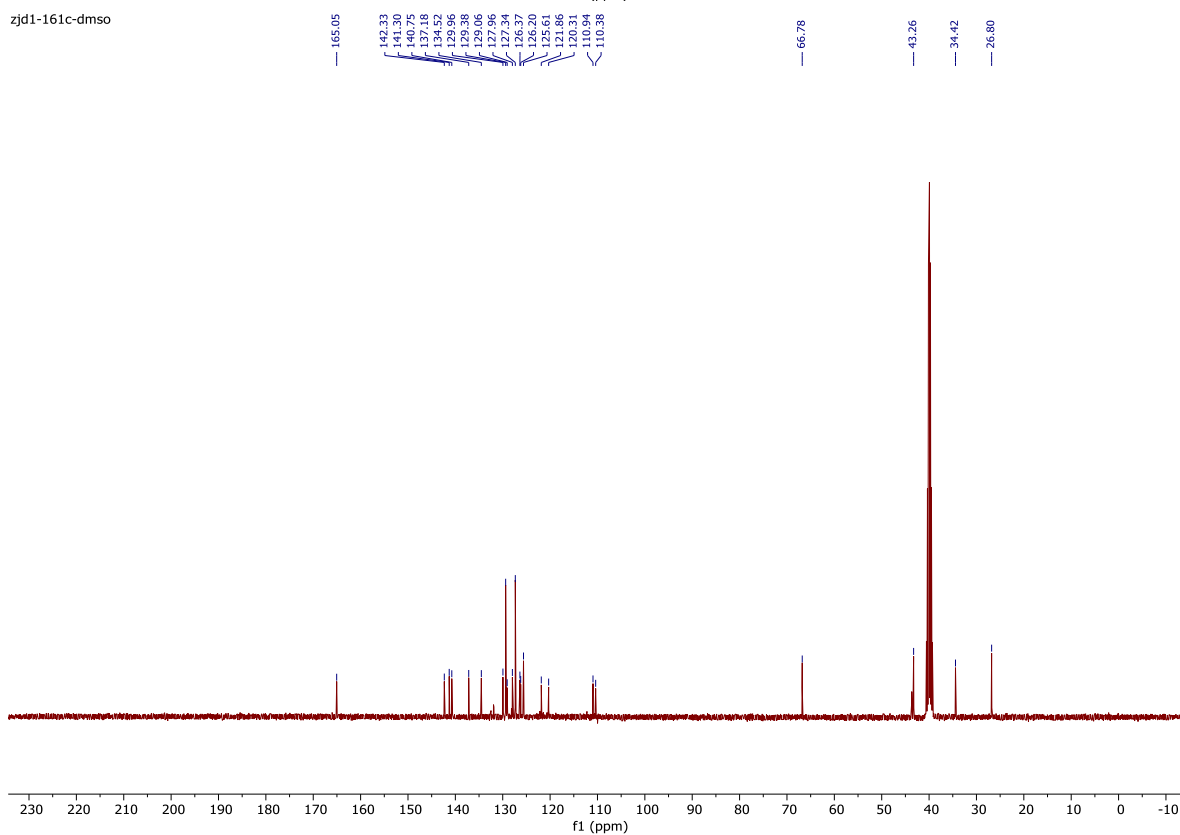

26. 6-(4-(Piperidin-1-ylmethyl)phenyl)-N-(piperidin-4-ylmethyl)-1H-indole-3-carboxamide Hydrochloride (**26**).

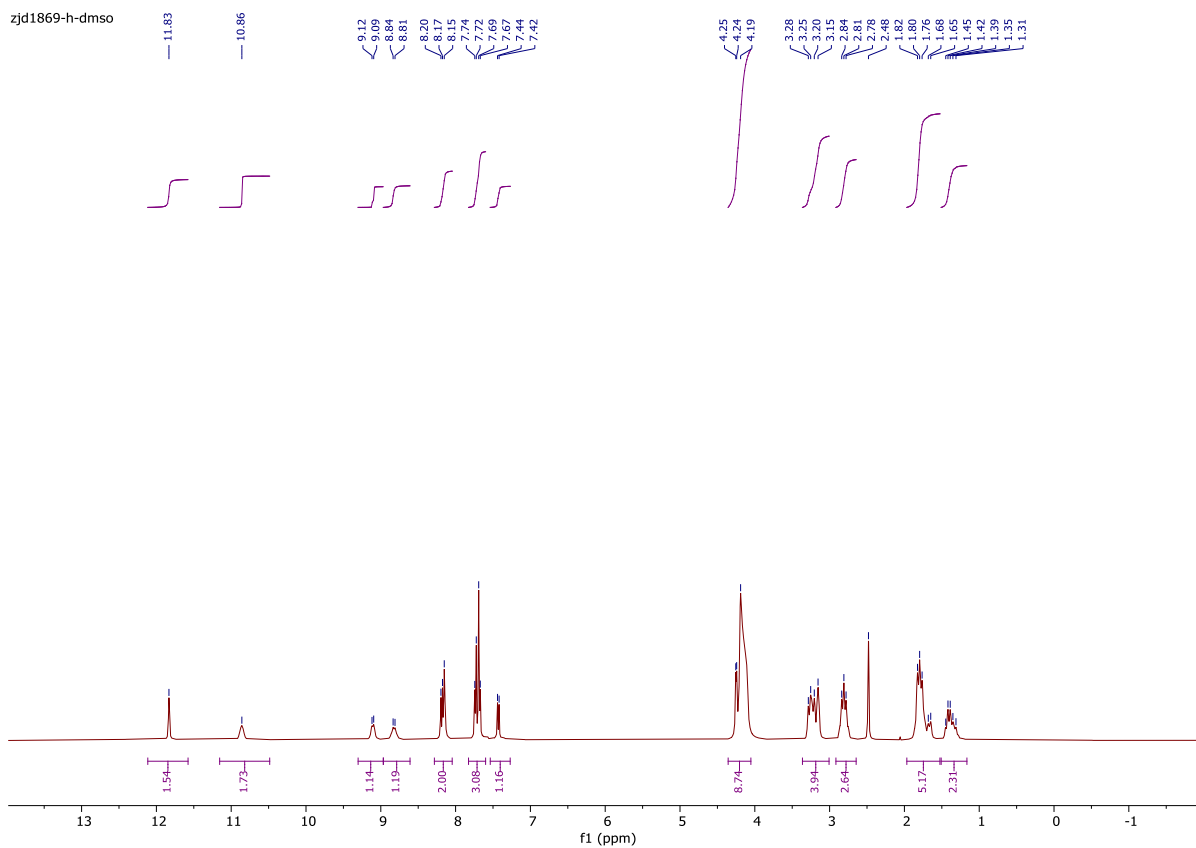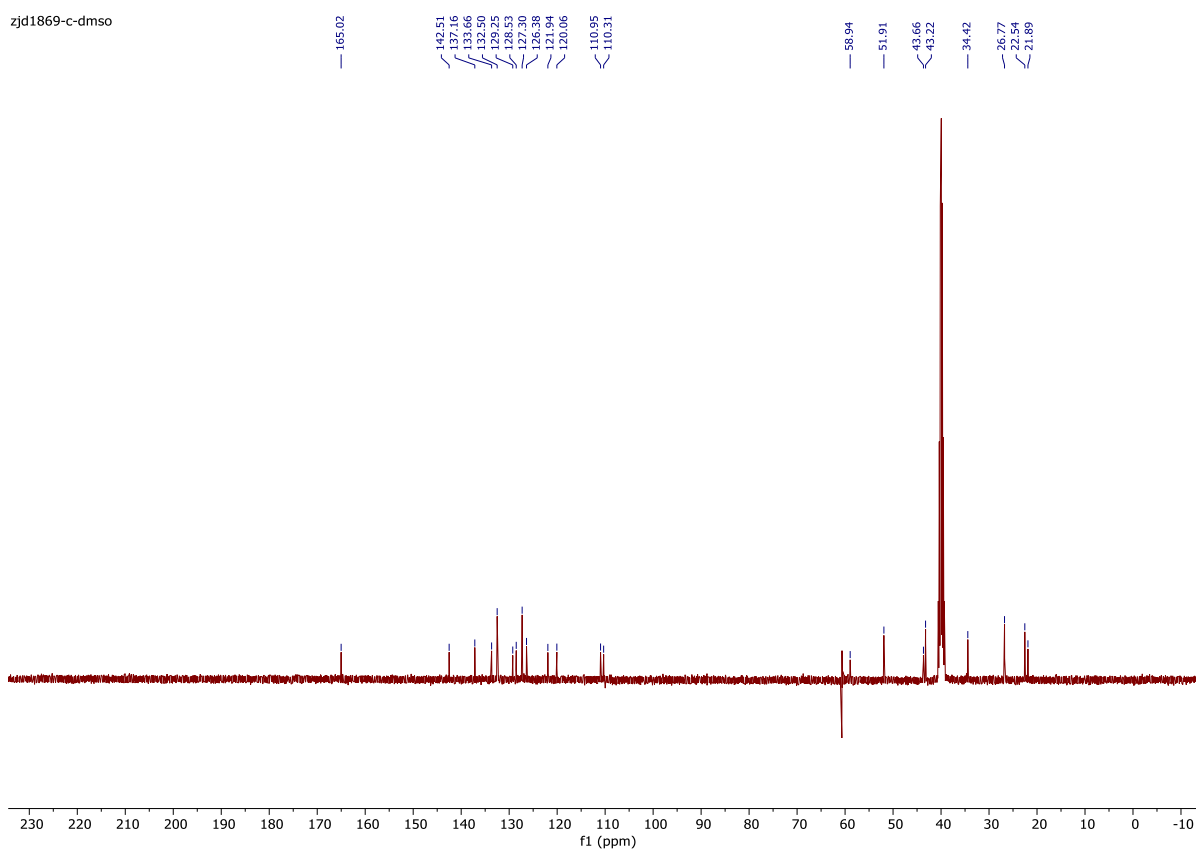

27. 6-(6-Chloropyridin-3-yl)-N-(piperidin-4-ylmethyl)-1H-indole-3-carboxamide Hydrochloride (27).

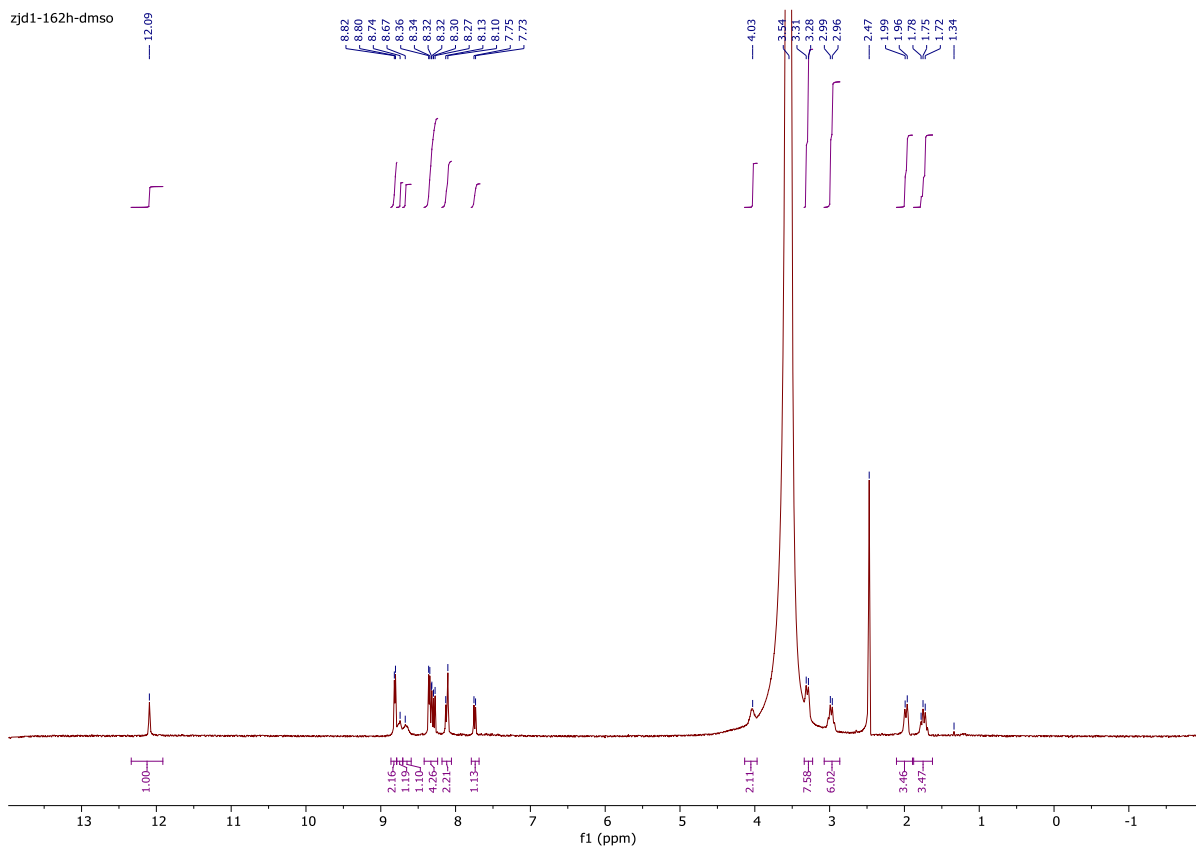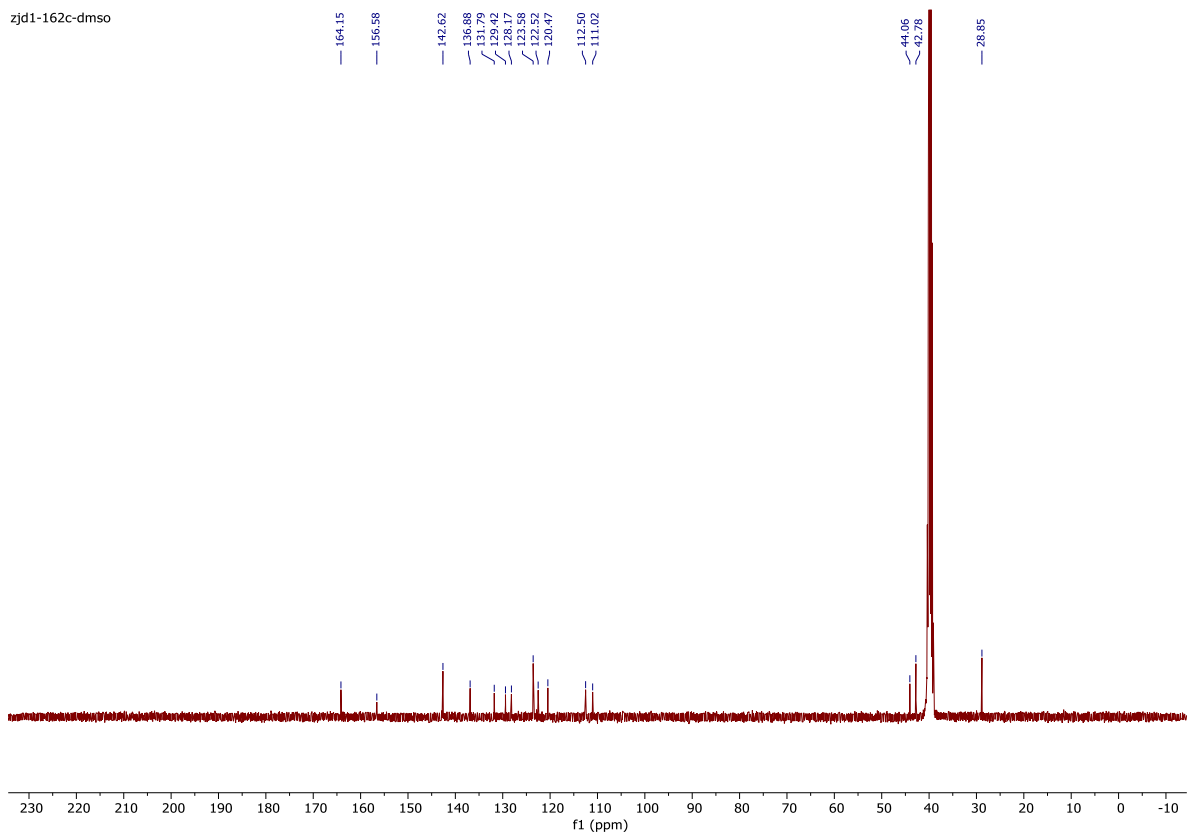

28 . N-(Piperidin-4-ylmethyl)-6-(pyridin-3-yl)-1H-indole-3-carboxamide Hydrochloride (28).

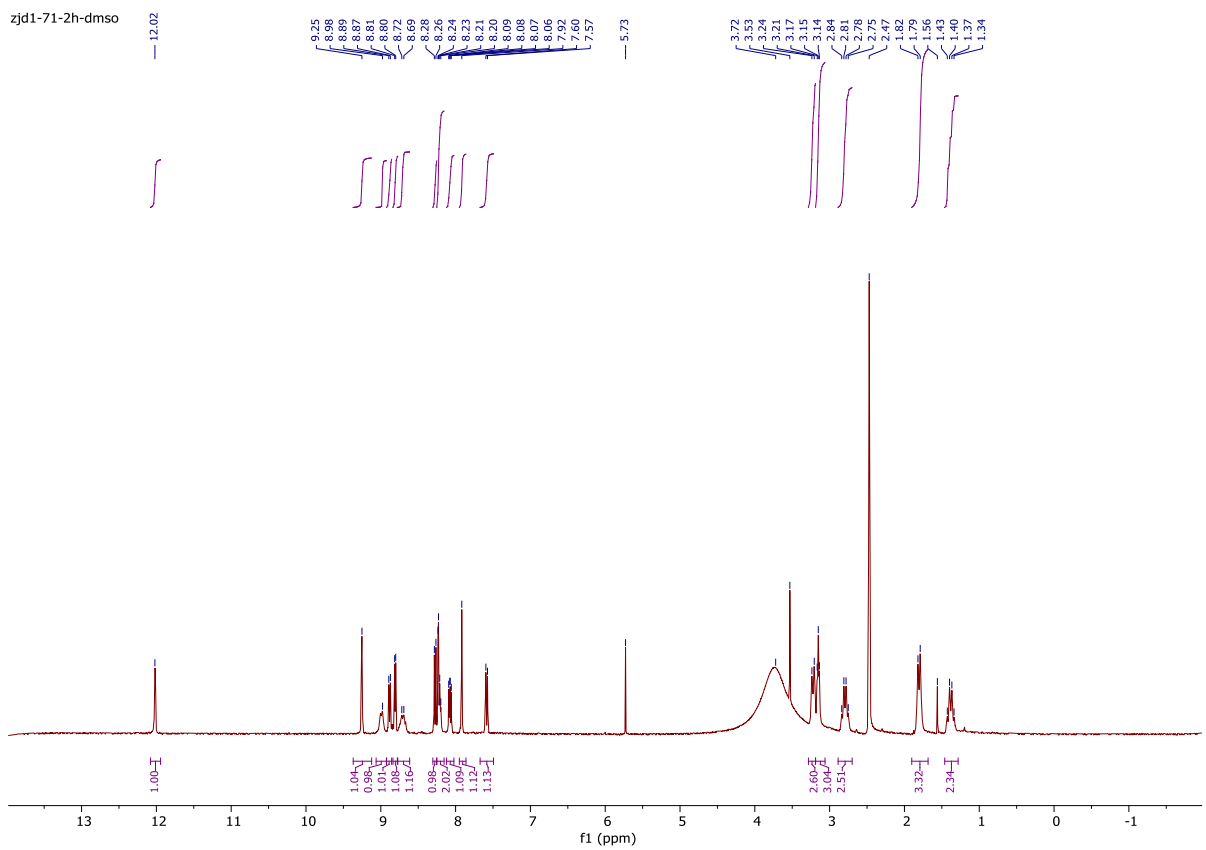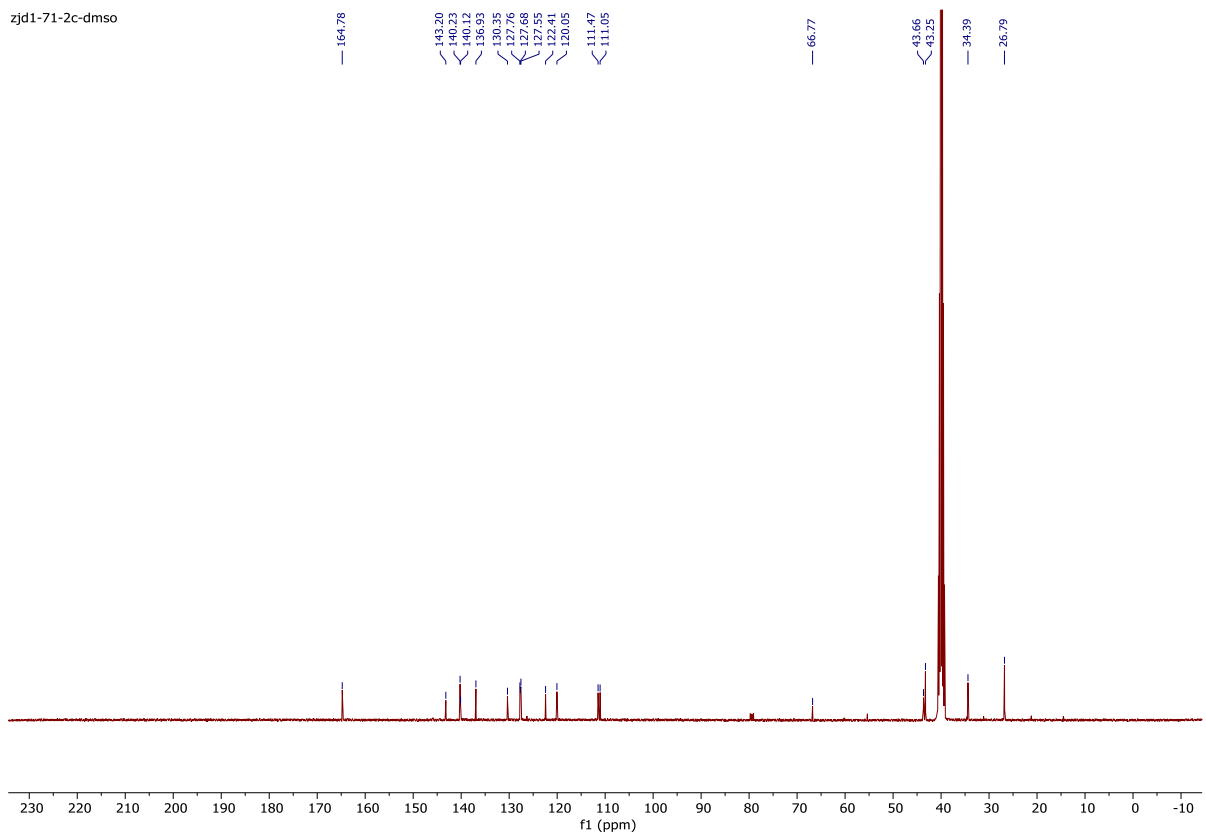

29. N-(Piperidin-4-ylmethyl)-6-(pyridin-4-yl)-1H-indole-3-carboxamide Hydrochloride (29).

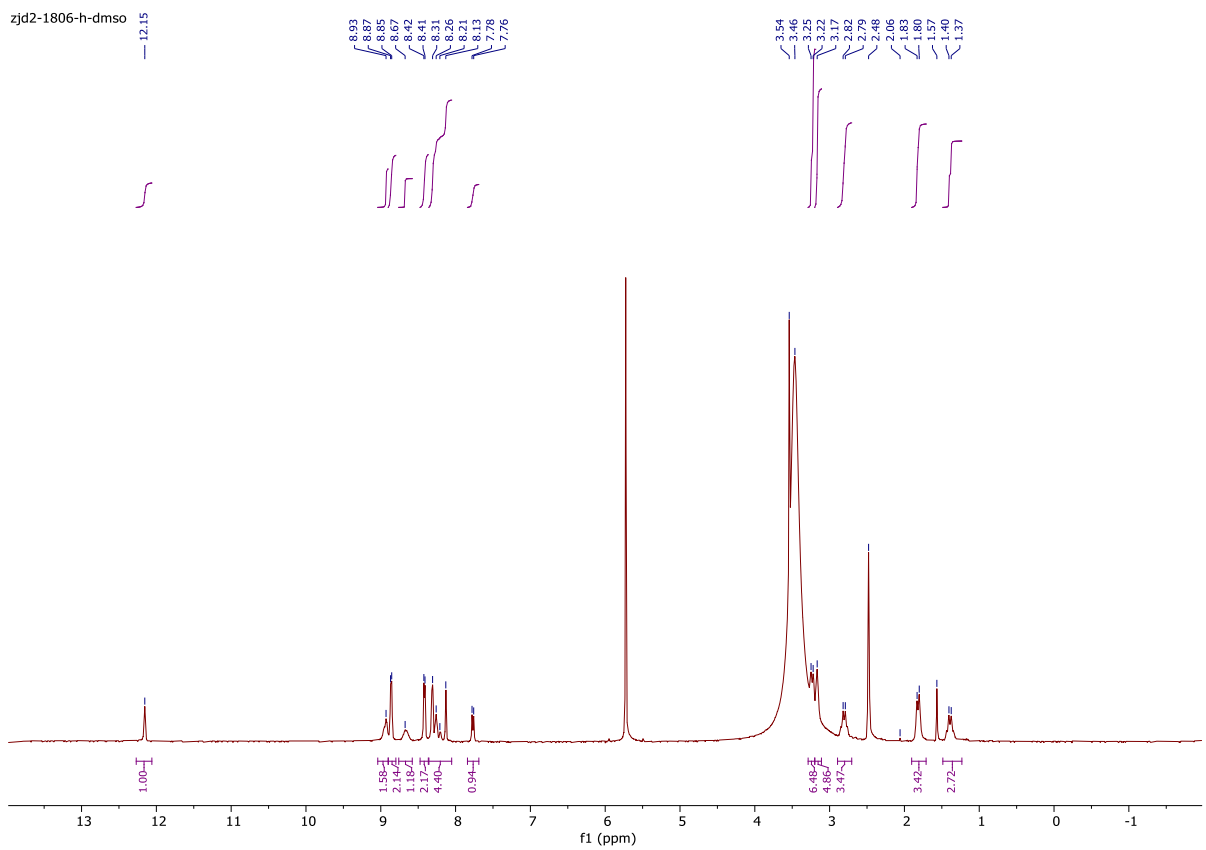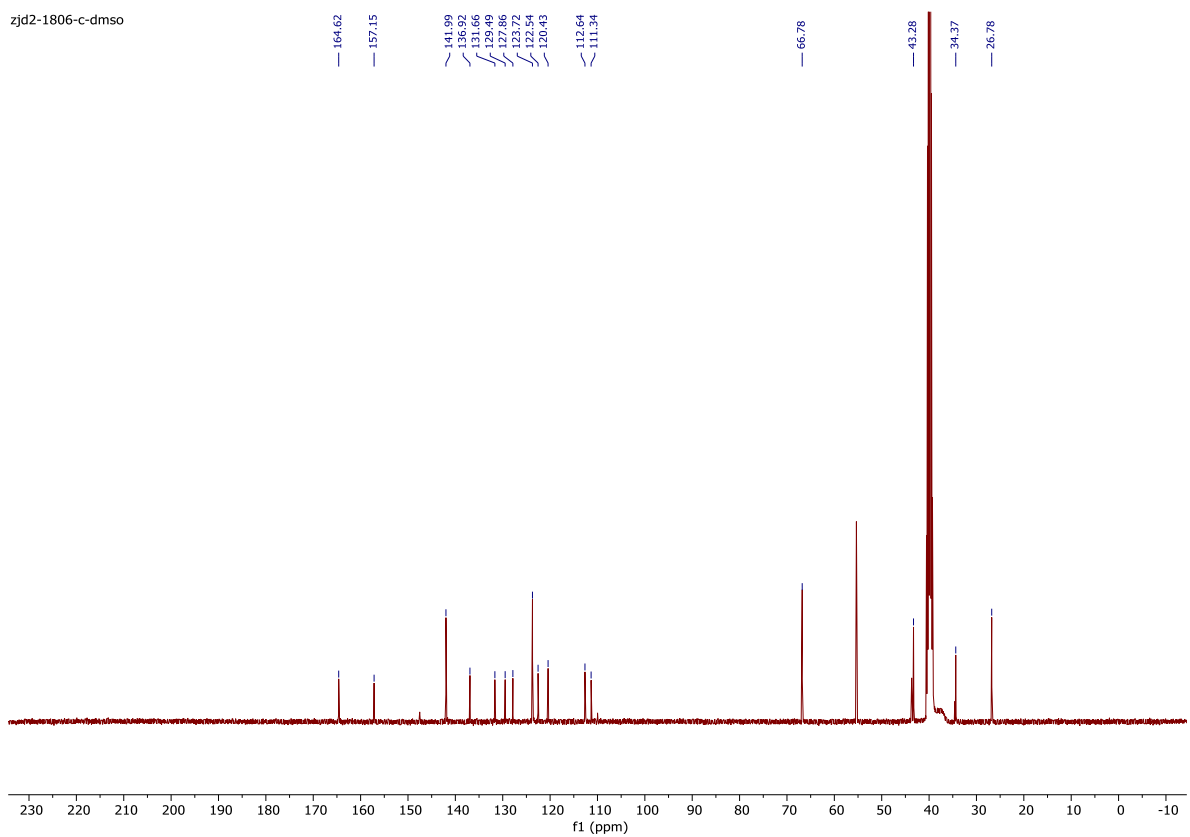

30. N-(Piperidin-4-yl)-6-(pyridin-4-yl)-1H-indole-3-carboxamide Hydrochloride (30).



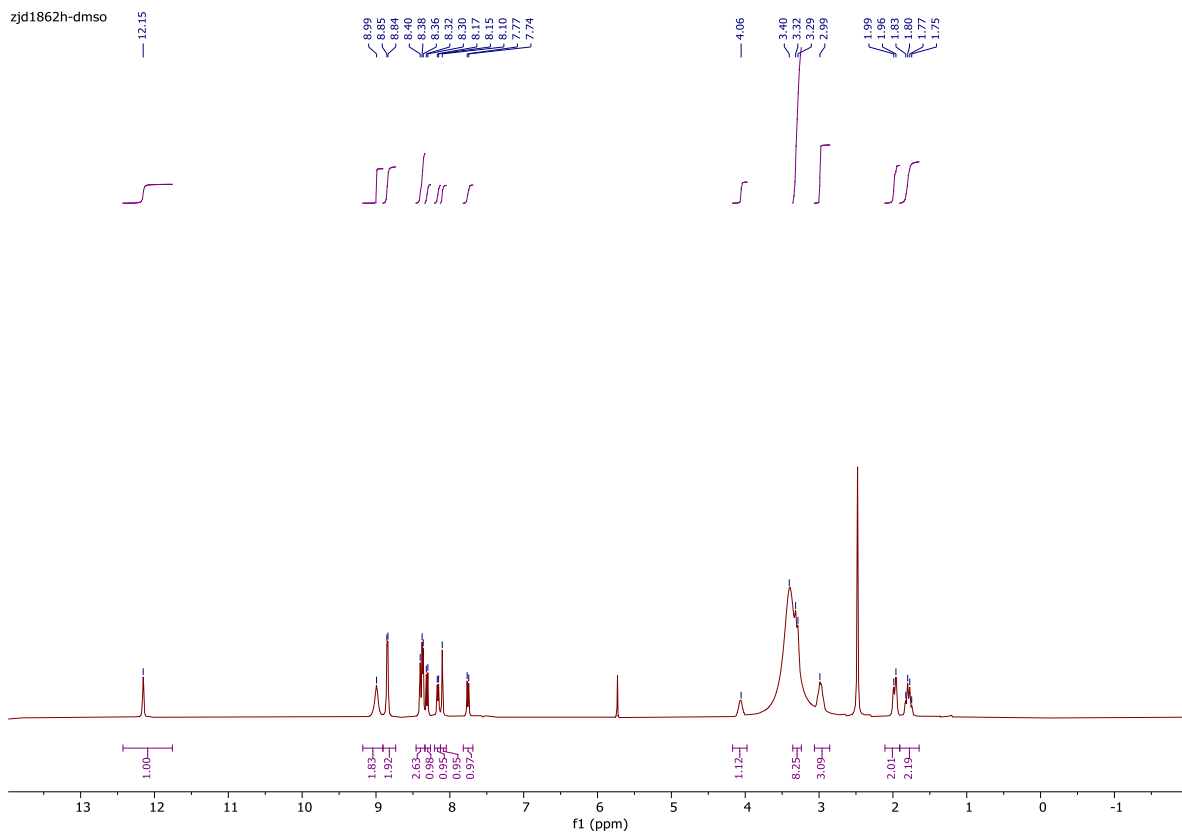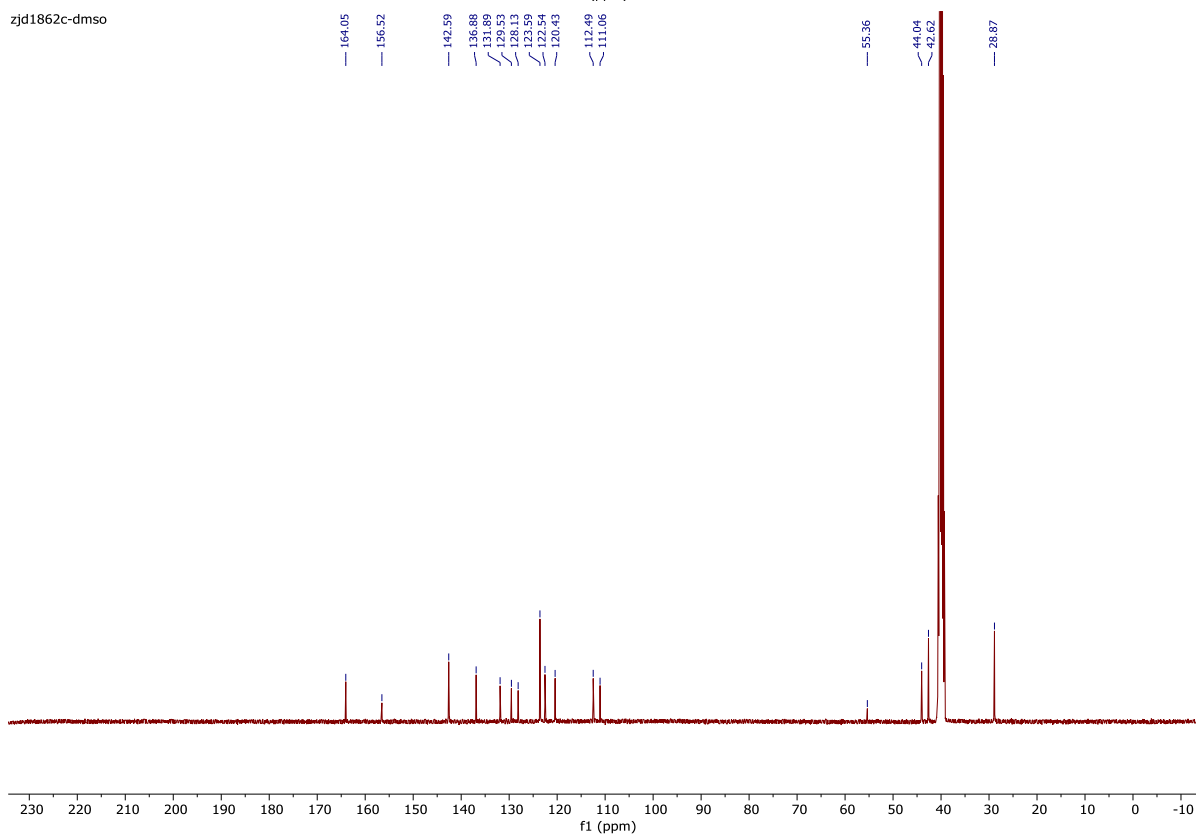

31. N-(2-(Piperidin-4-yl)ethyl)-6-(pyridin-4-yl)-1H-indole-3-carboxamide Hydrochloride (31).

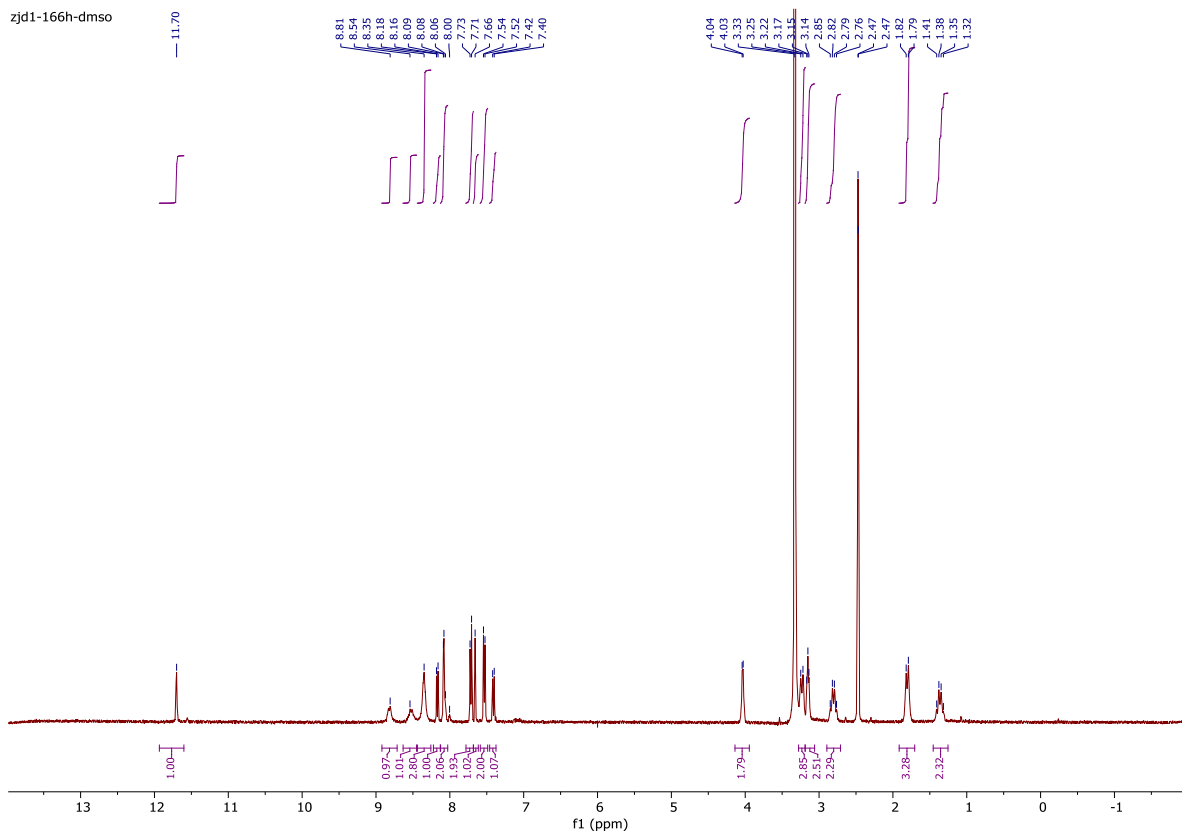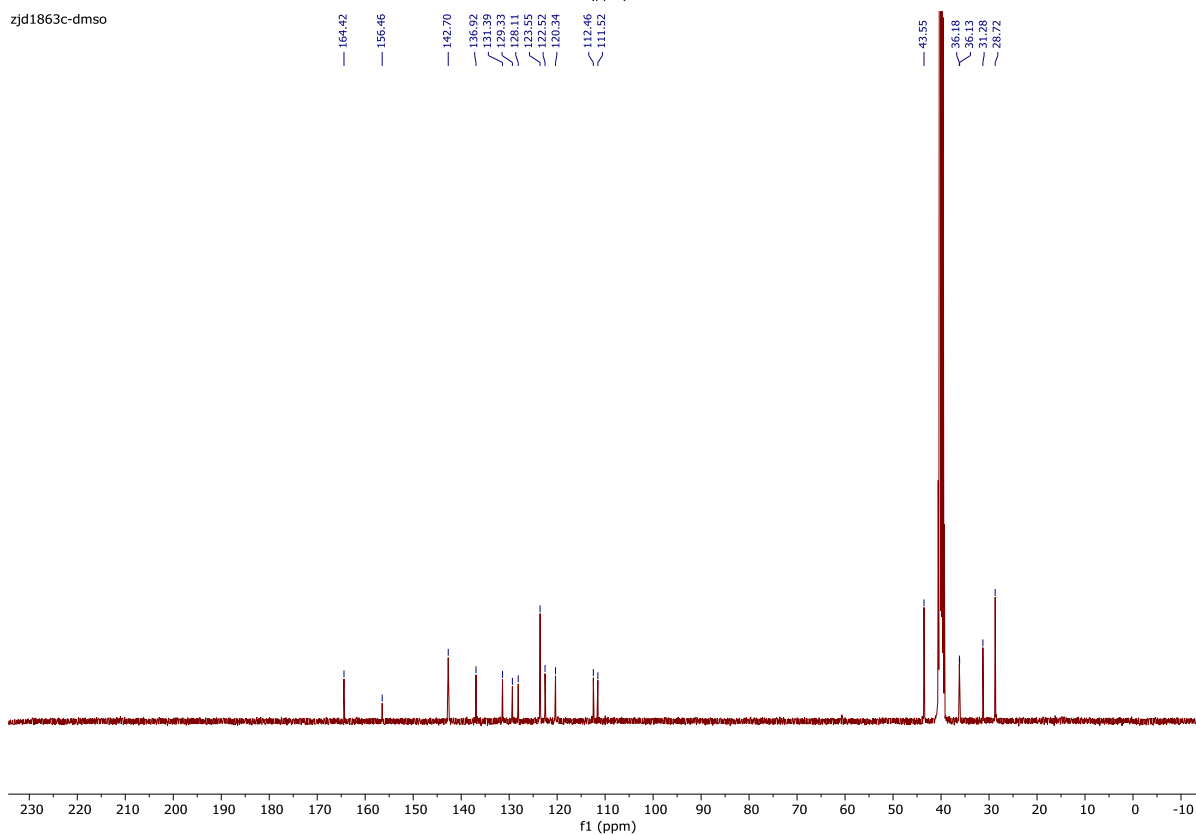

32. N-(Piperidin-4-ylmethyl)-6-(1H-pyrazol-3-yl)-1H-indole-3-carboxamide Hydrochloride (32).

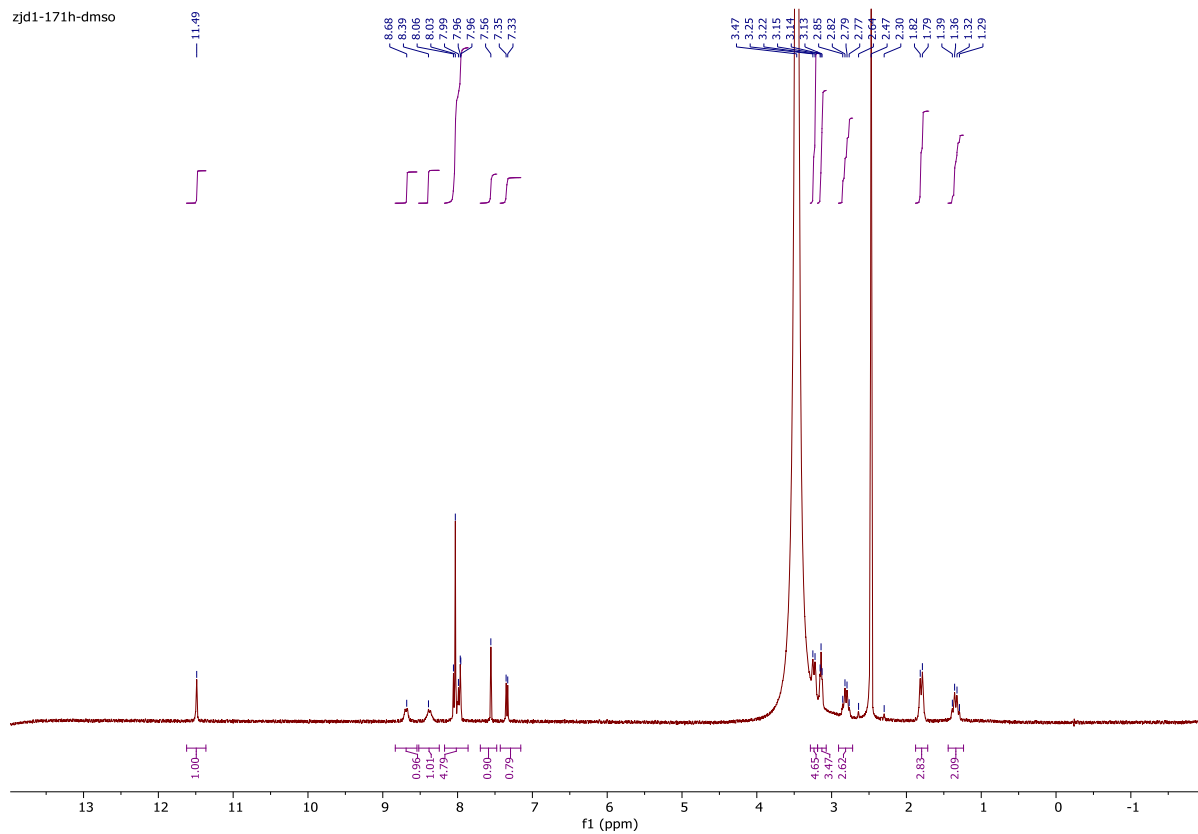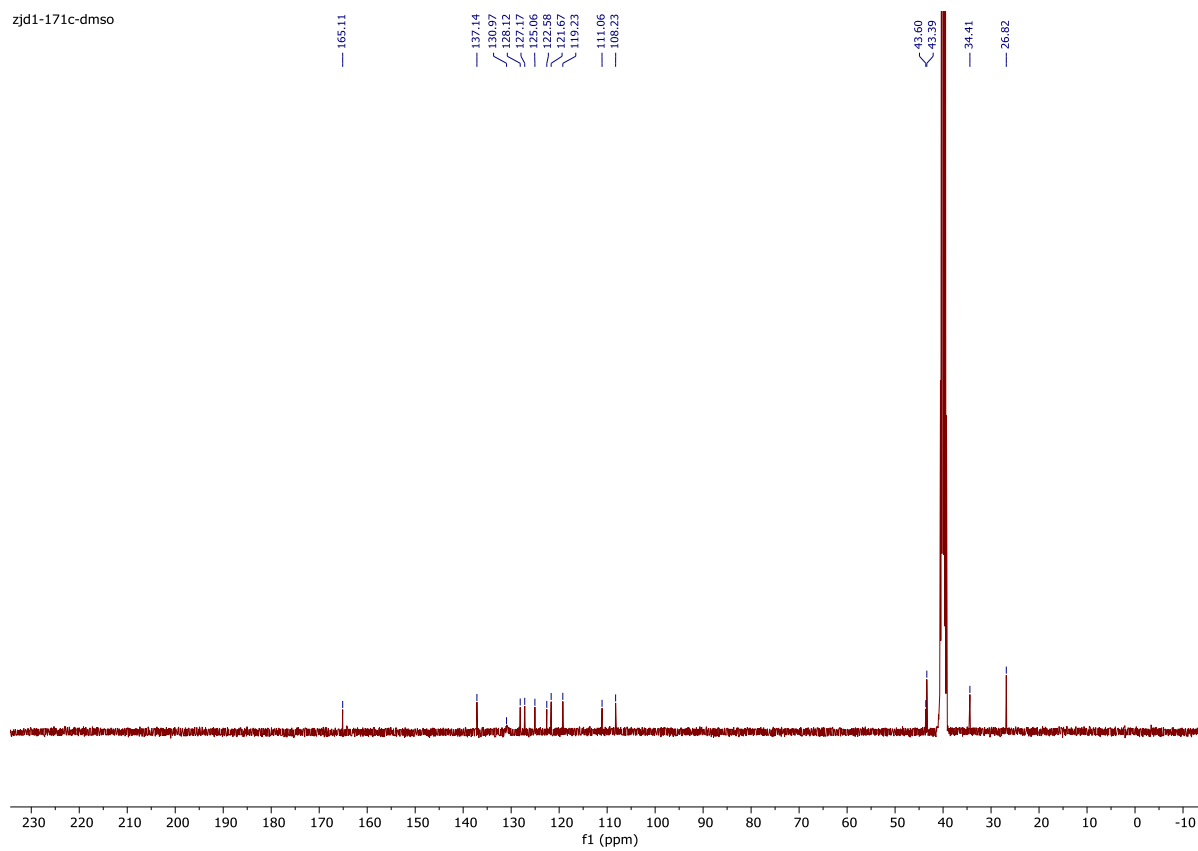

33. N-(Piperidin-4-ylmethyl)-5-(pyridin-3-yl)-1H-indole-2-carboxamide Hydrochloride (**33**).

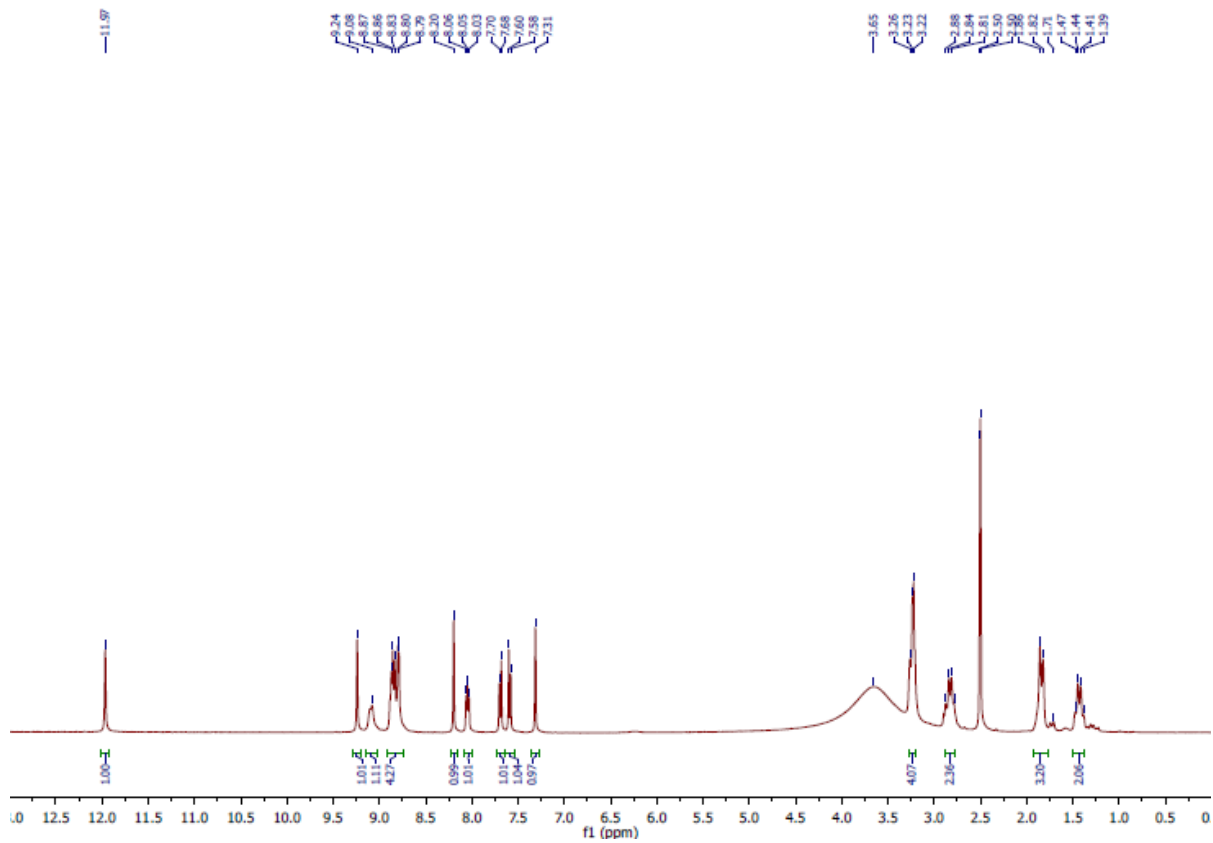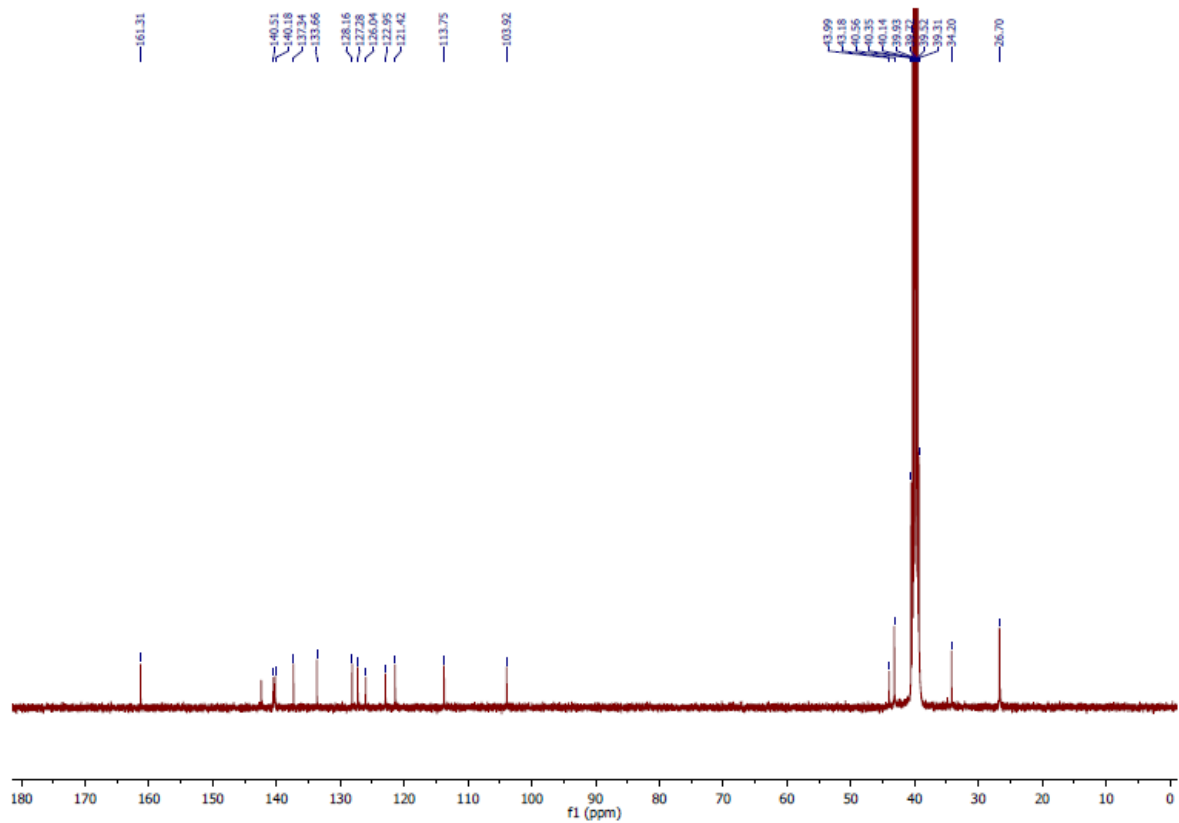

34. N-(Piperidin-4-ylmethyl)-5-(pyridin-4-yl)-1H-indole-2-carboxamide Hydrochloride (**34**).

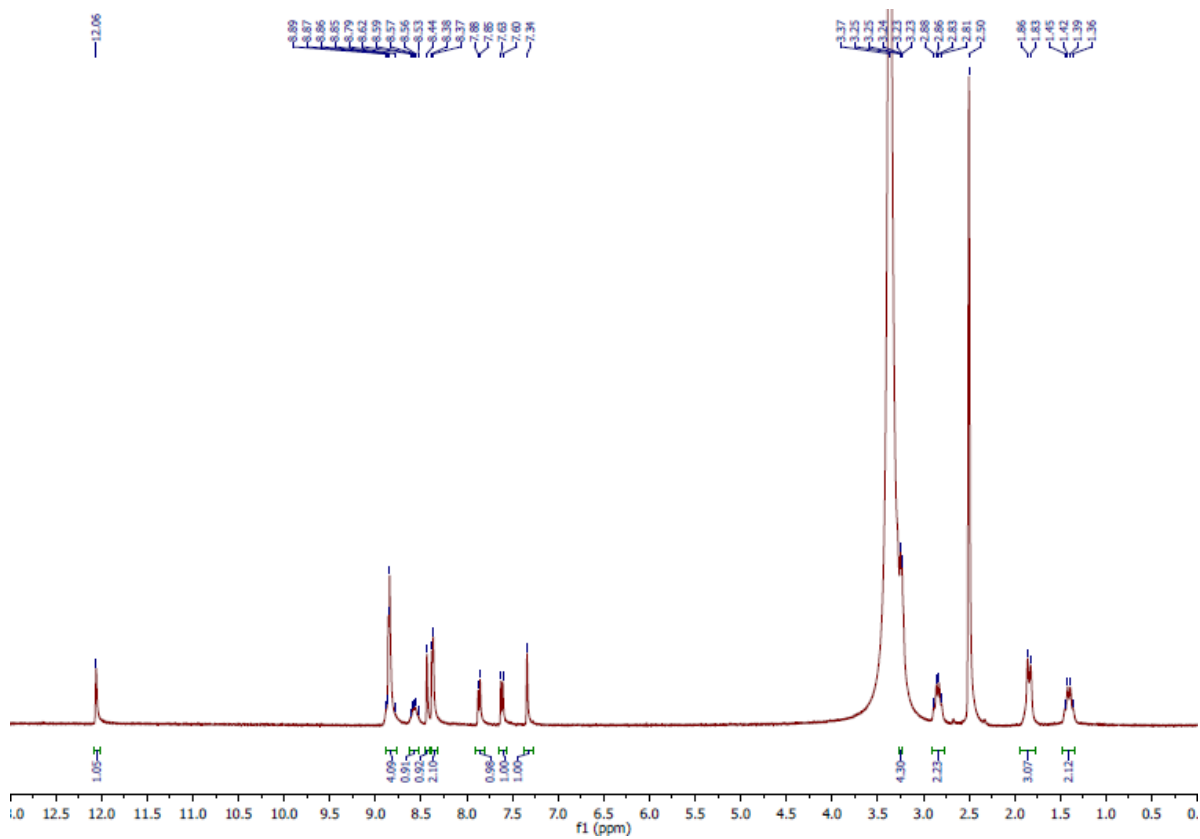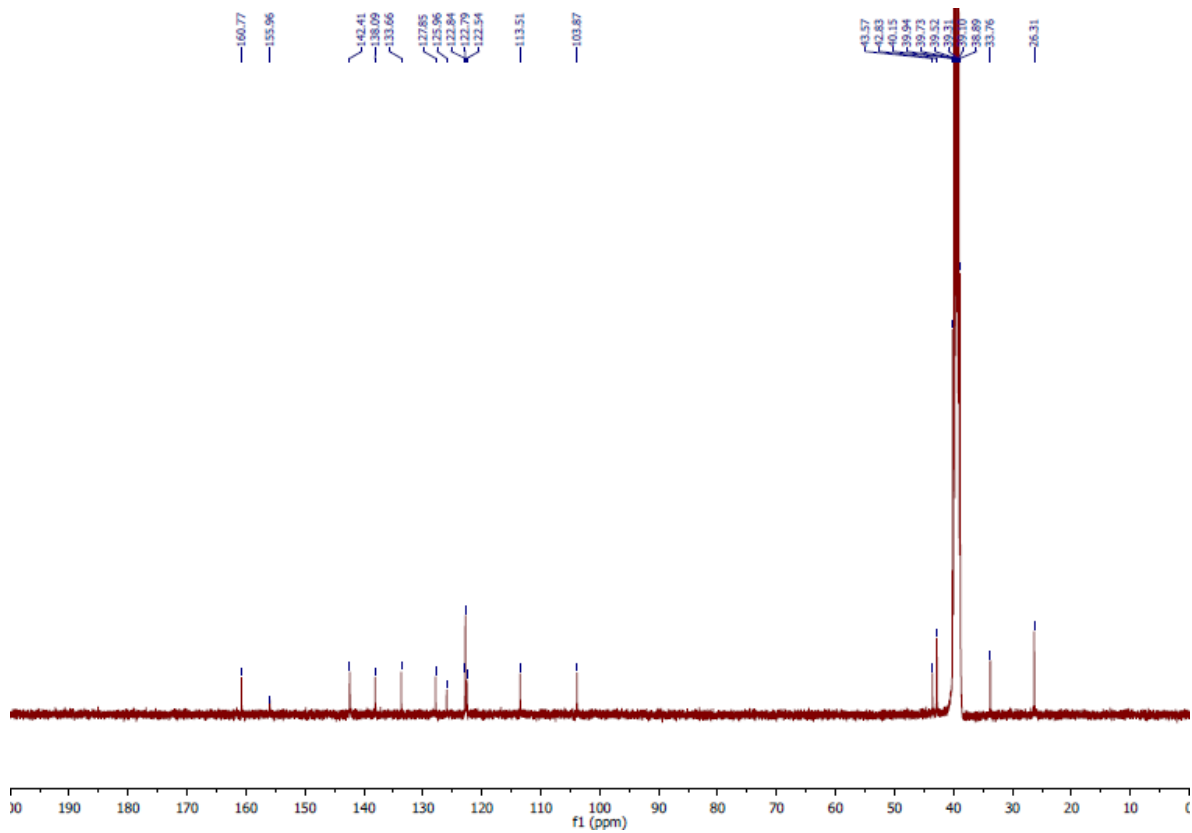

35. N-(Piperidin-4-ylmethyl)-5-(1H-pyrazol-4-yl)-1H-indole-2-carboxamide Hydrochloride

(35).

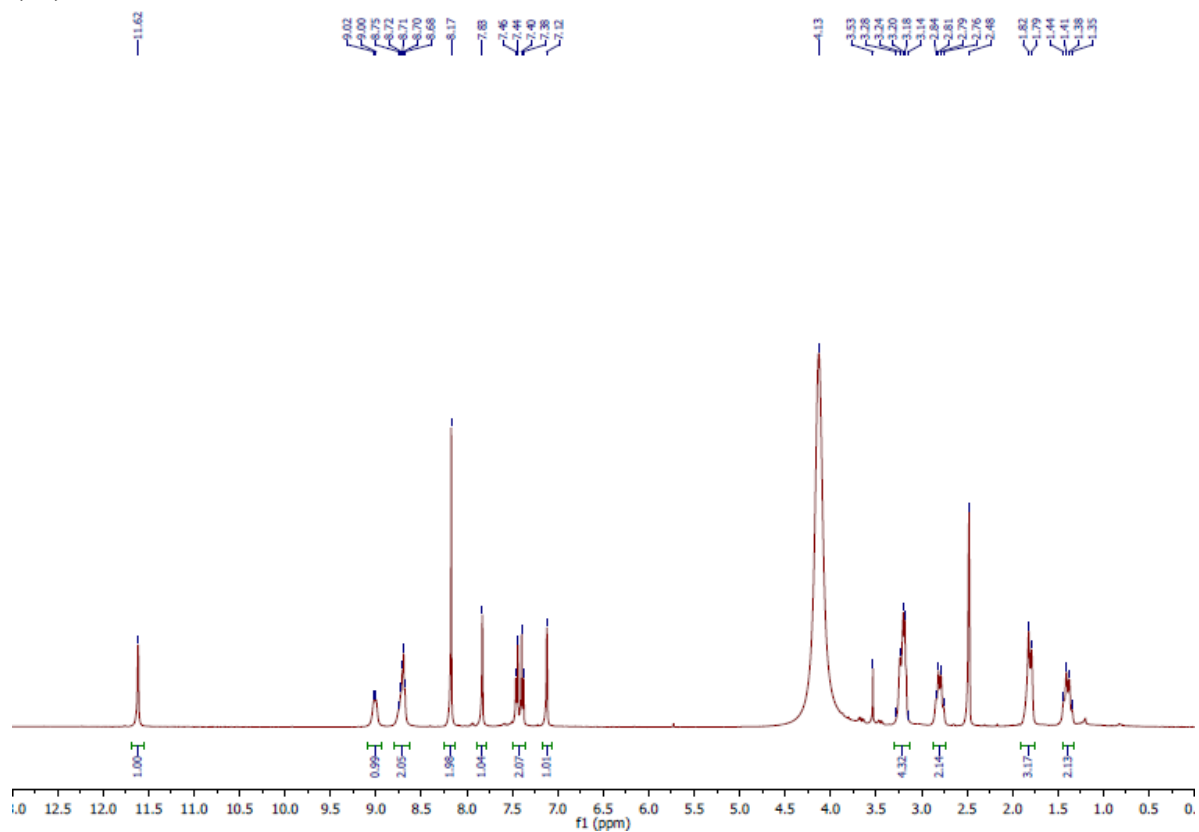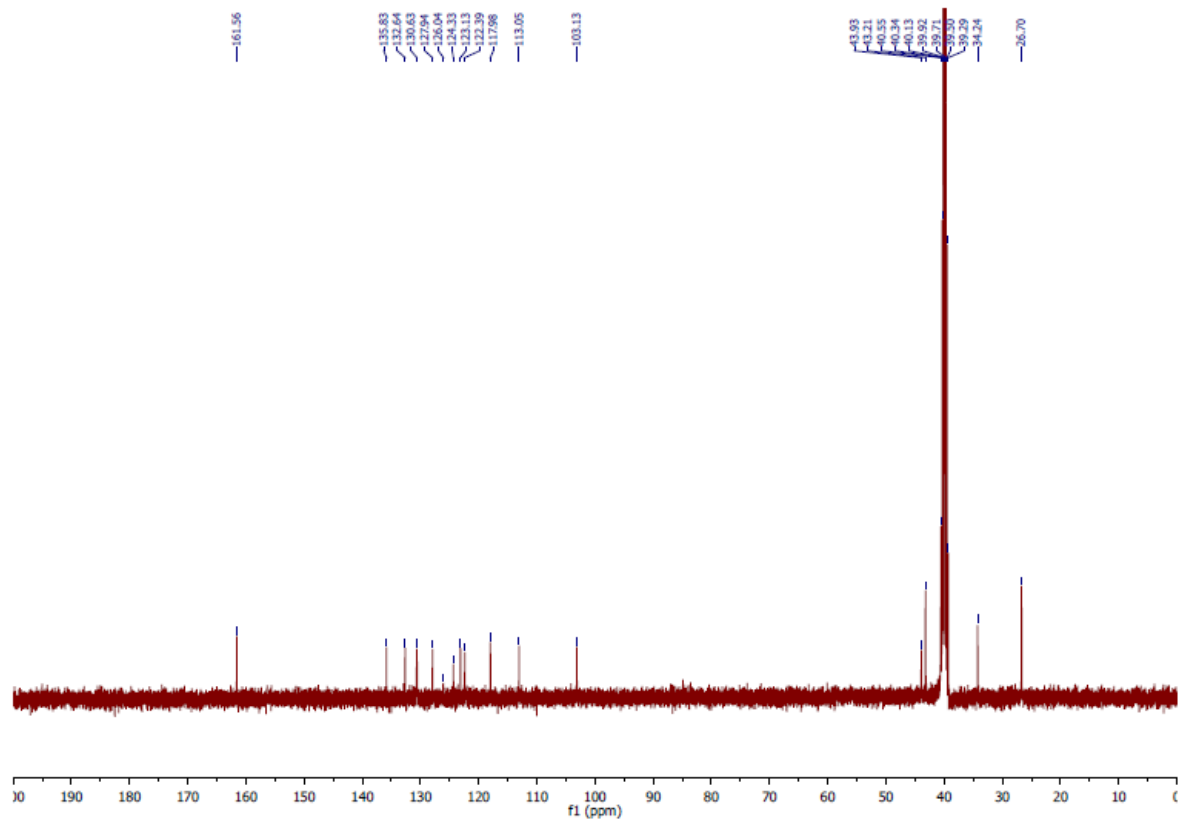

36. 5-(4-(Aminomethyl)phenyl)-N-(piperidin-4-ylmethyl)-1H-indole-2-carboxamide Hydrochloride (**36**).

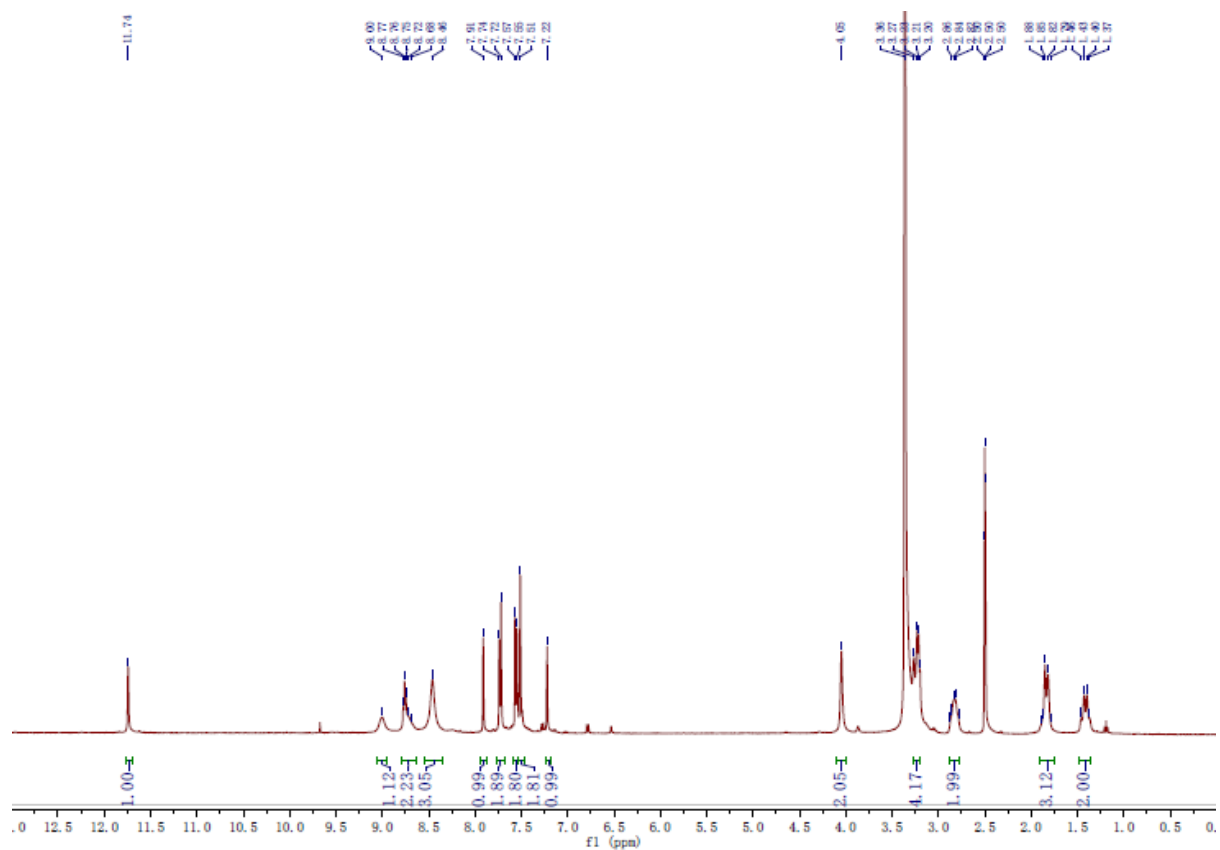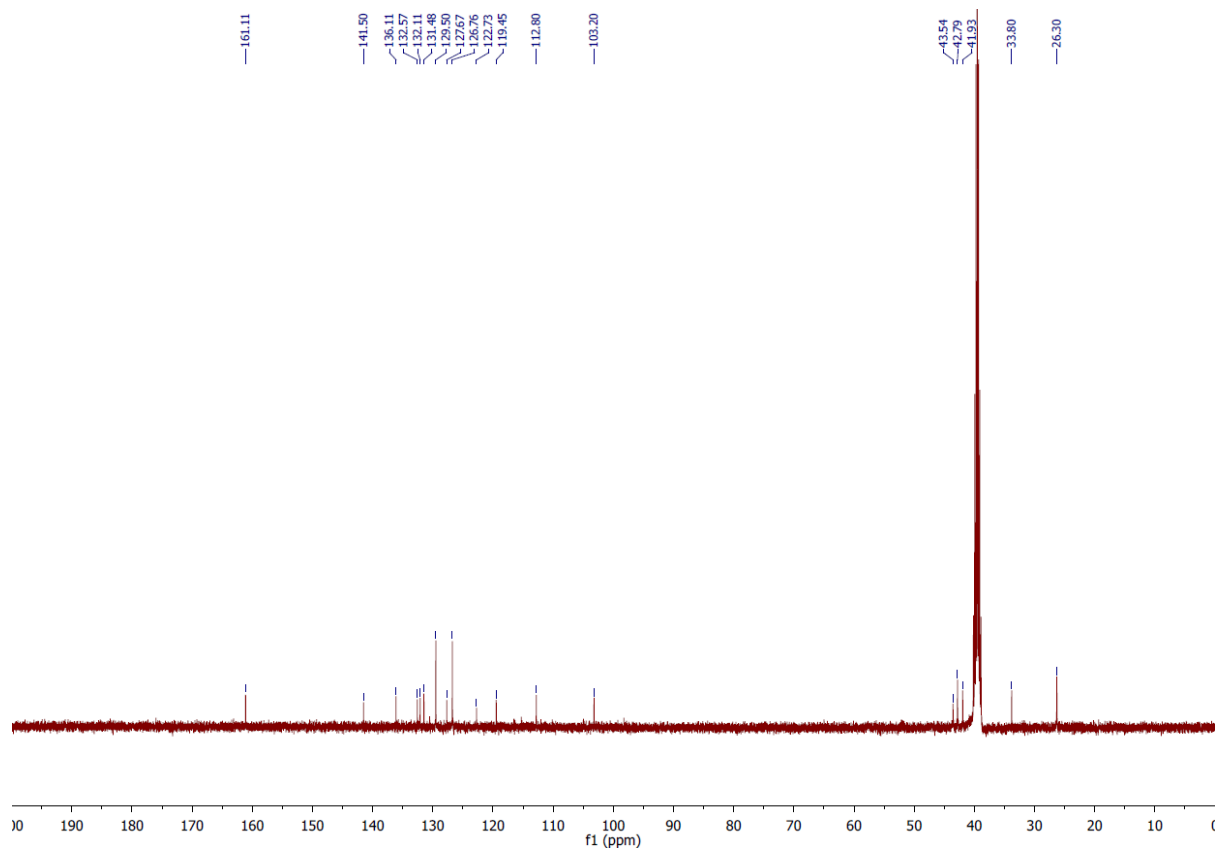

37. 5-(4-(Furan-3-yl)phenyl)-N-(piperidin-4-ylmethyl)-1H-indole-2-carboxamide Hydrochloride (**37**).

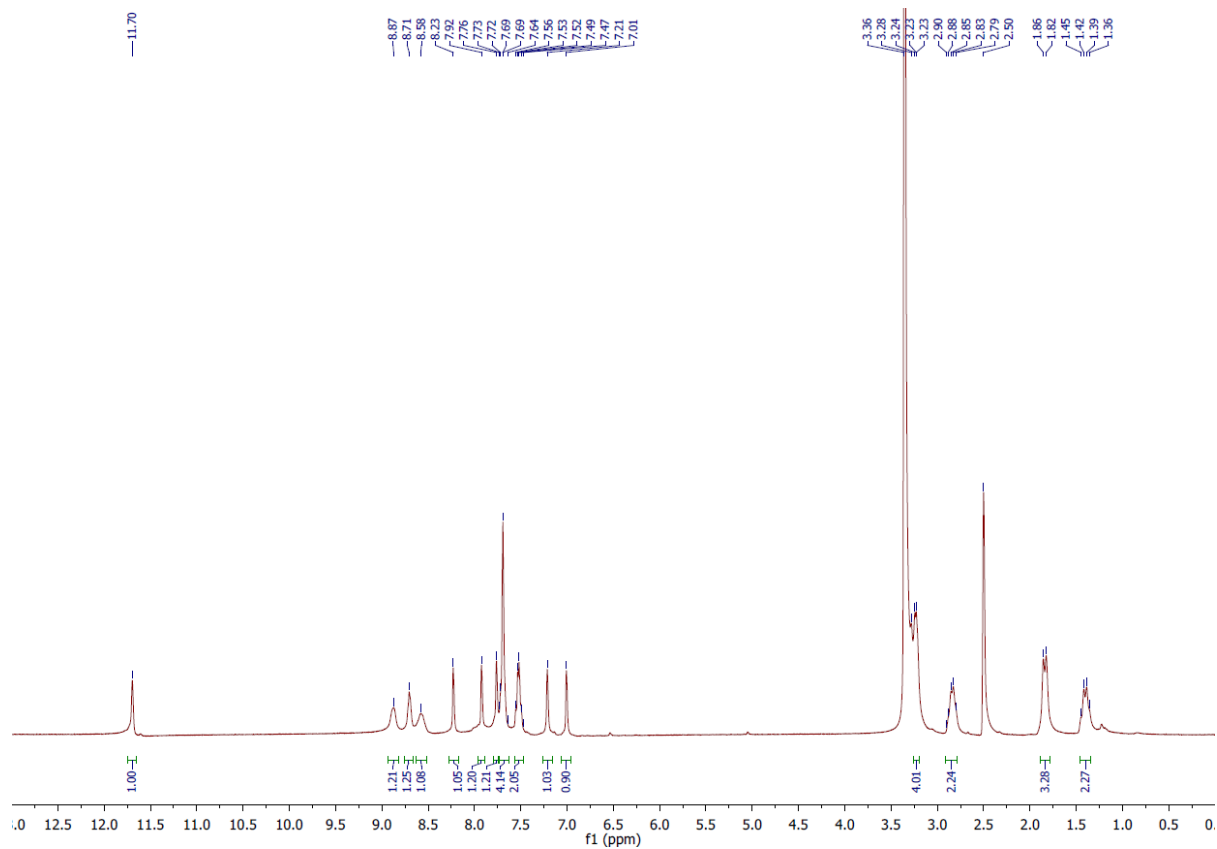



38. N-(Piperidin-4-ylmethyl)-5-(4-(thiophen-3-yl)phenyl)-1H-indole-2-carboxamide Hydrochloride (**38**).

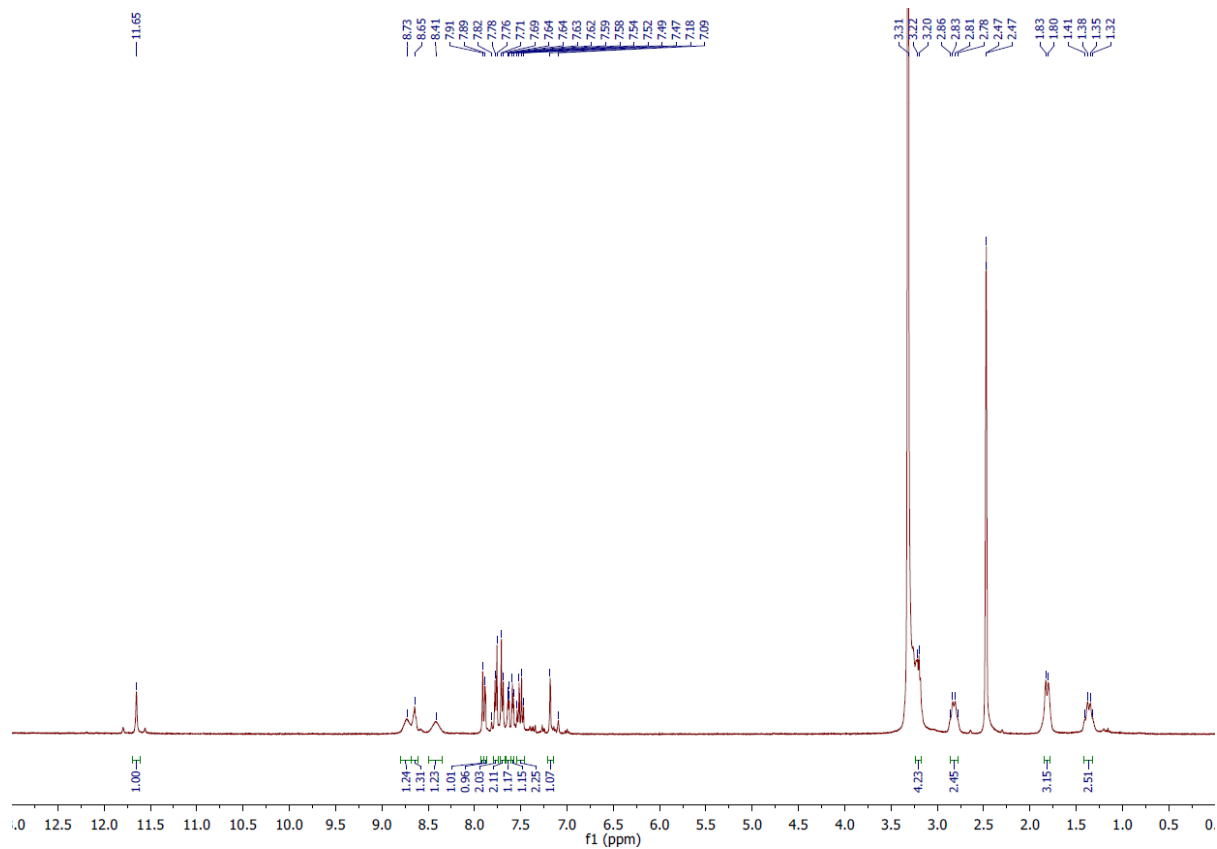

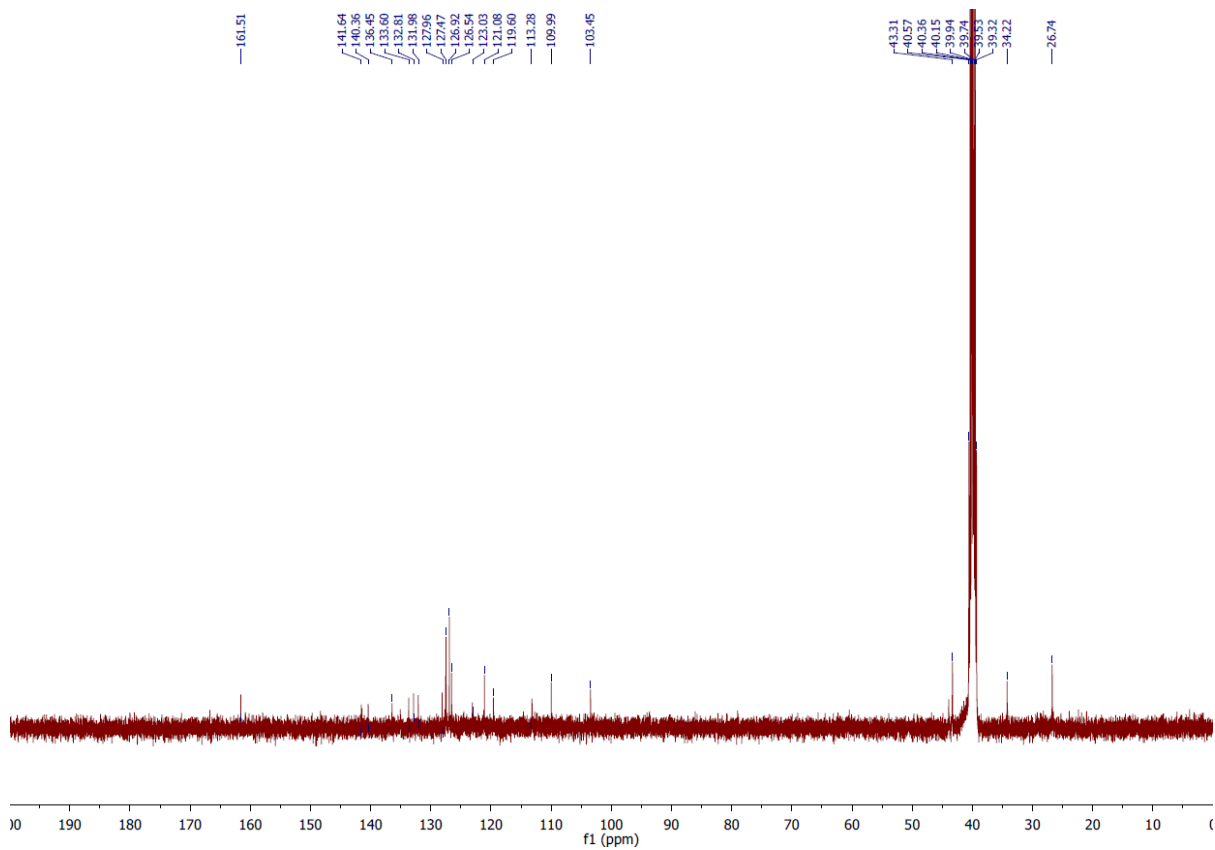

39. 5-(4-(Piperidin-1-ylmethyl)phenyl)-N-(piperidin-4-ylmethyl)-1H-indole-2-carboxamide Hydrochloride (**39**).

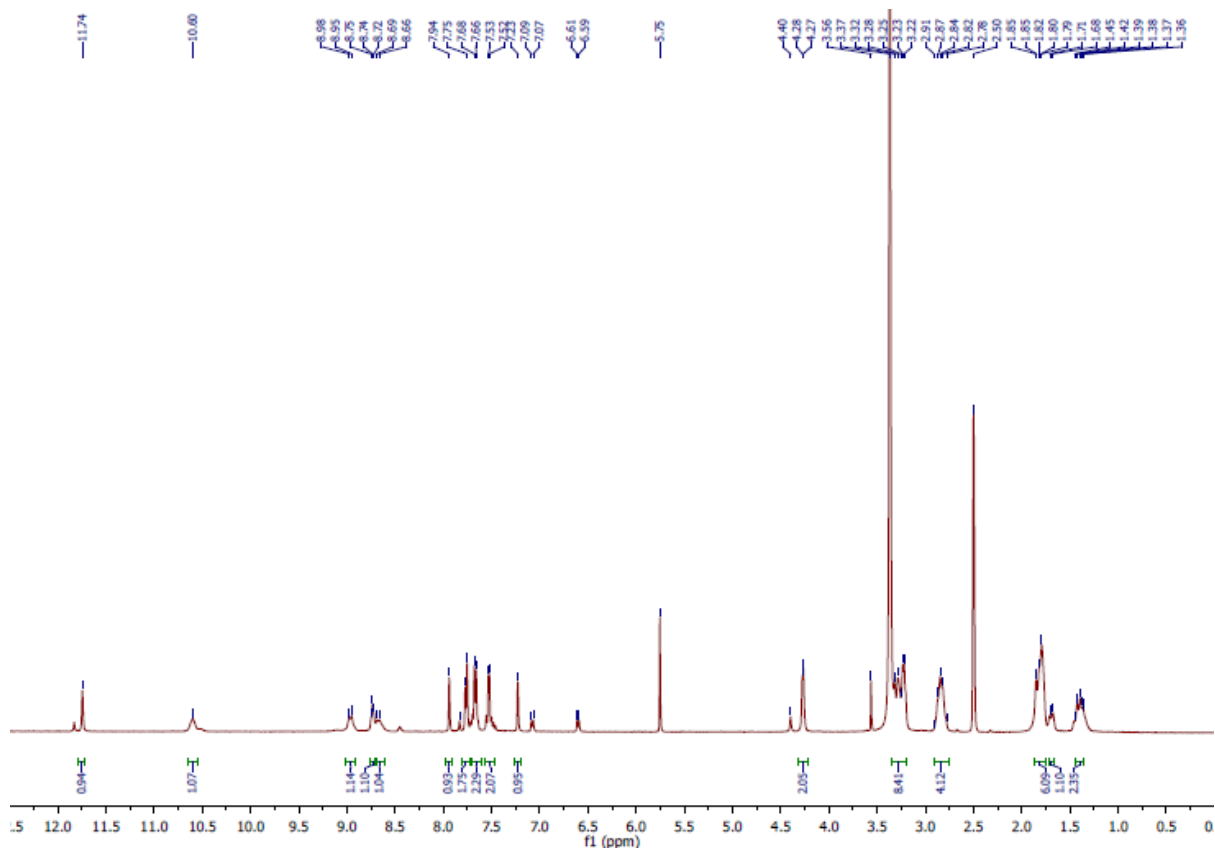

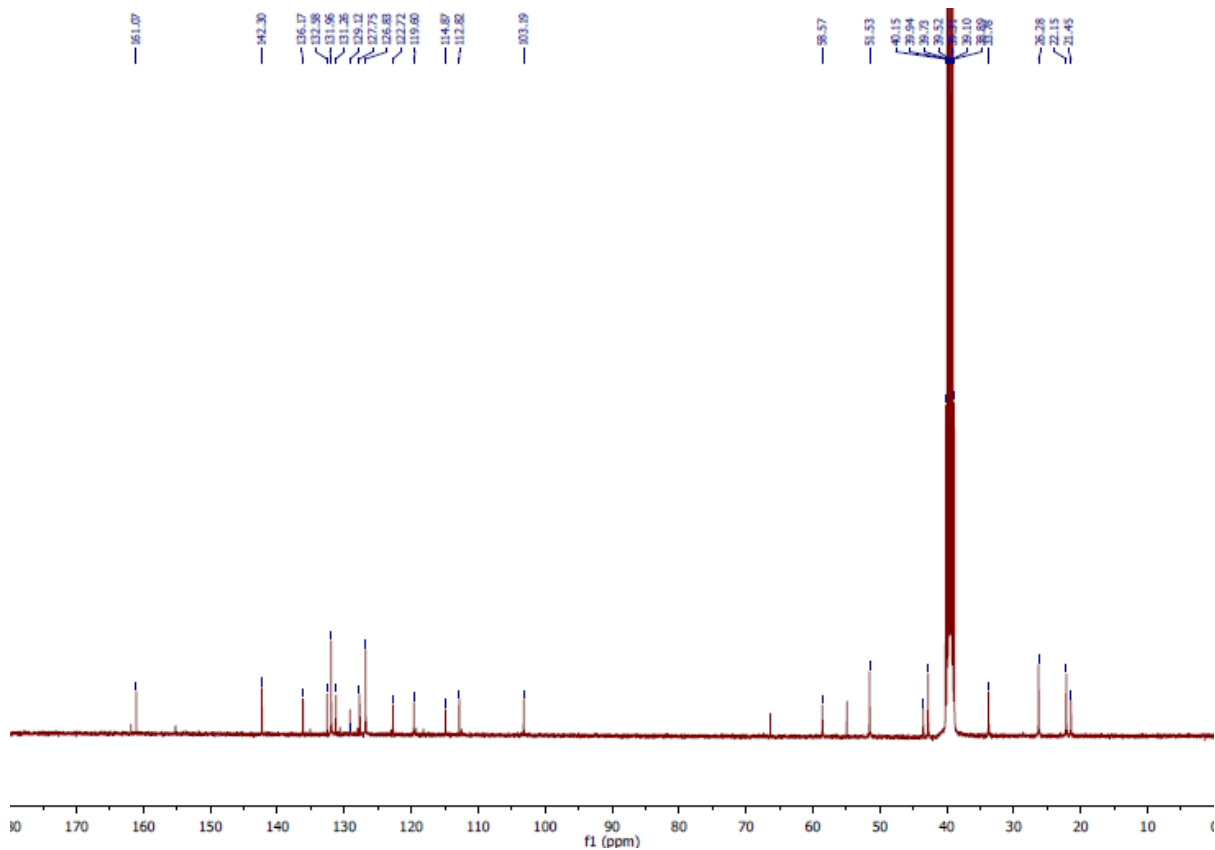

40. 5-(4-(Piperidin-1-yl)phenyl)-N-(piperidin-4-ylmethyl)-1H-indole-2-carboxamide Hydrochloride (**40**).

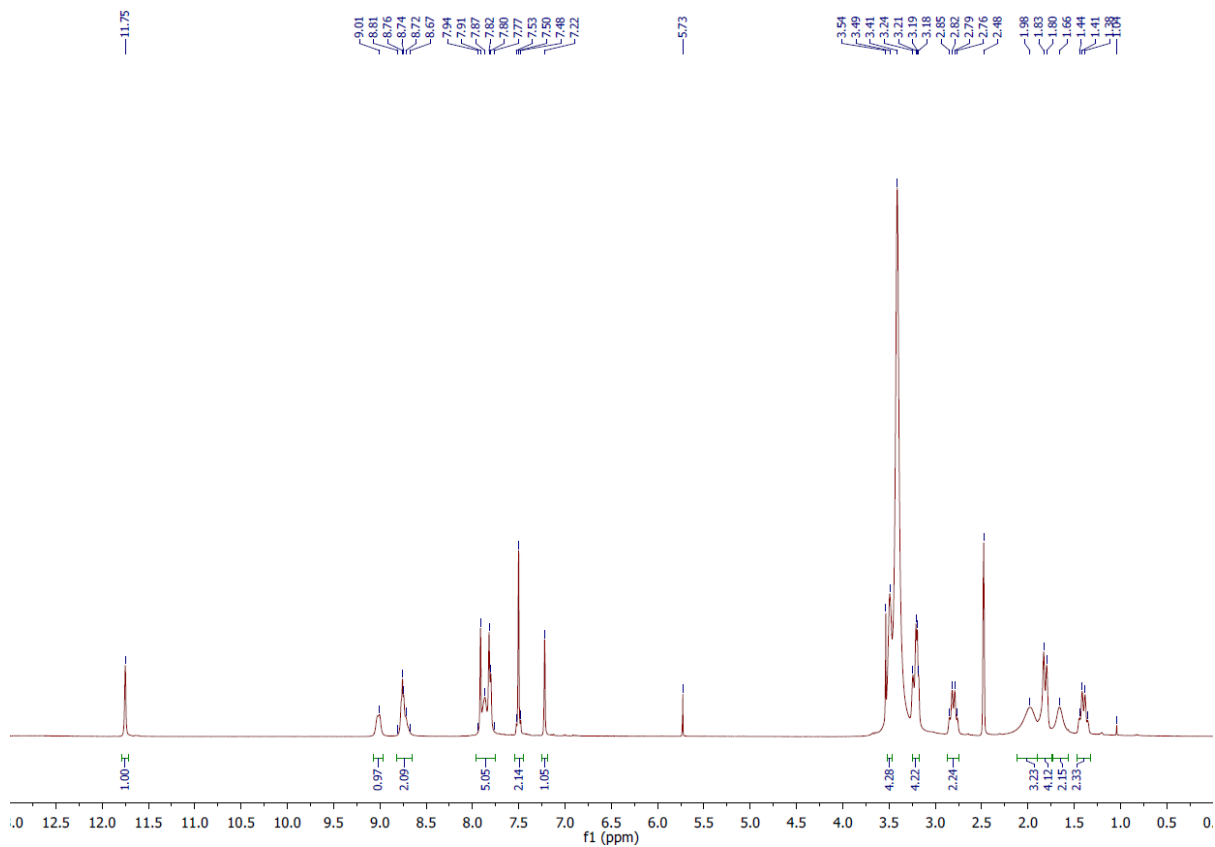

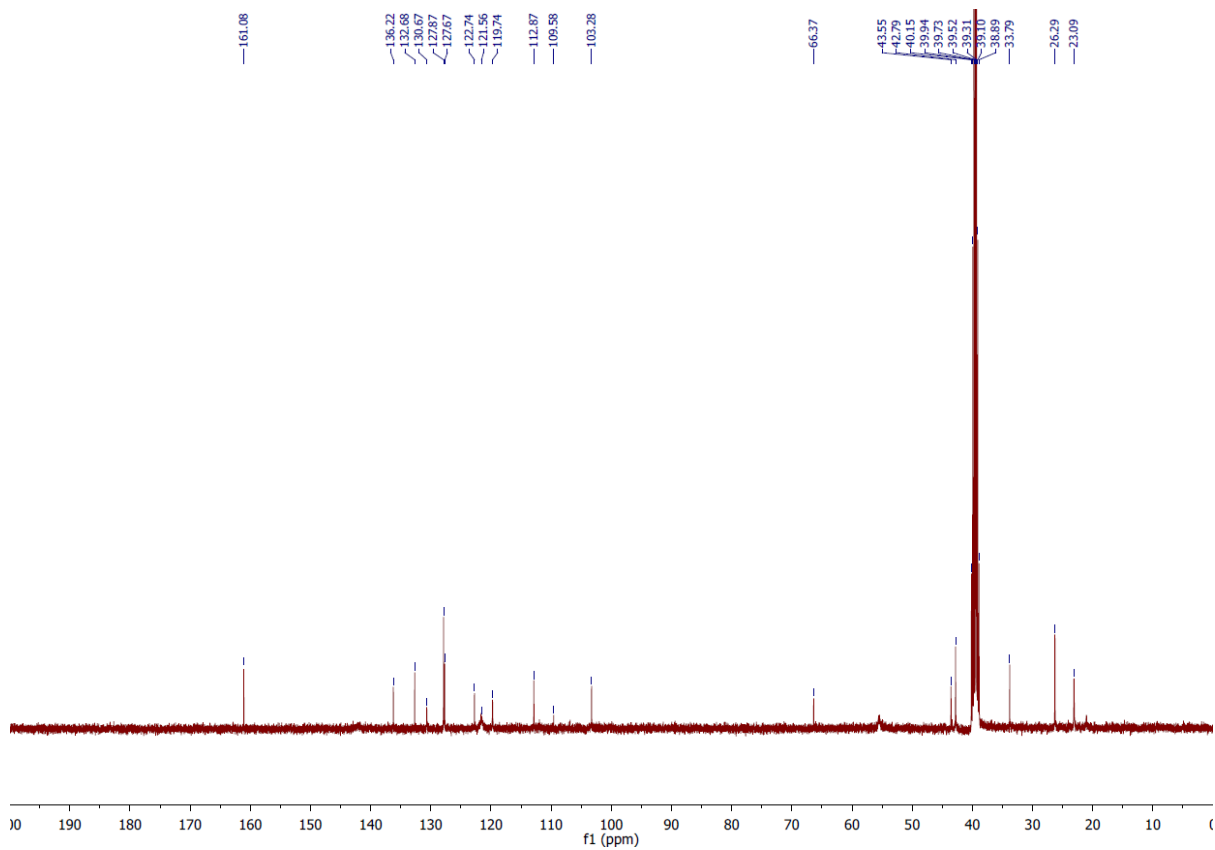

41. N-(Piperidin-4-ylmethyl)-5-(4-(pyrrolidin-1-yl)phenyl)-1H-indole-2-carboxamide Hydrochloride (**41**).

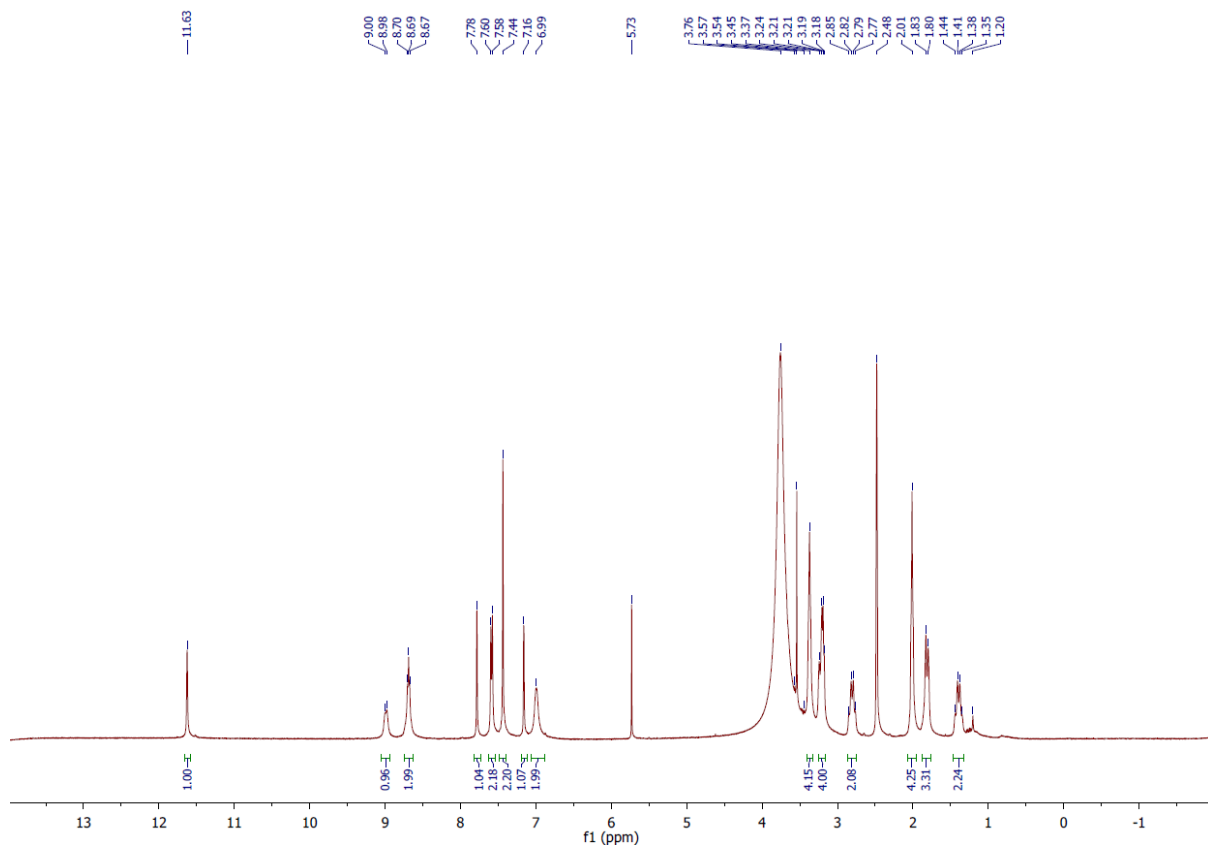

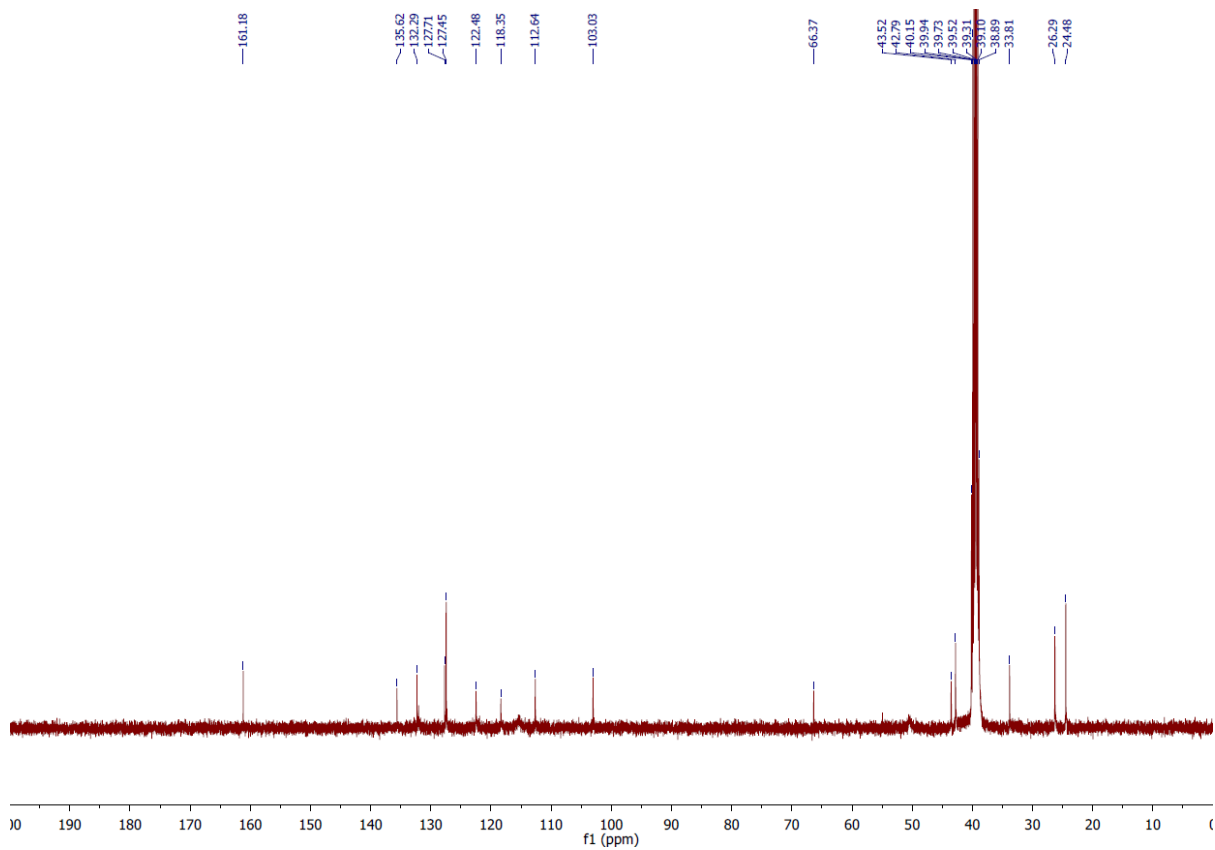

42. 5-(4-Morpholinophenyl)-N-(piperidin-4-ylmethyl)-1H-indole-2-carboxamide Hydrochloride (**42**).

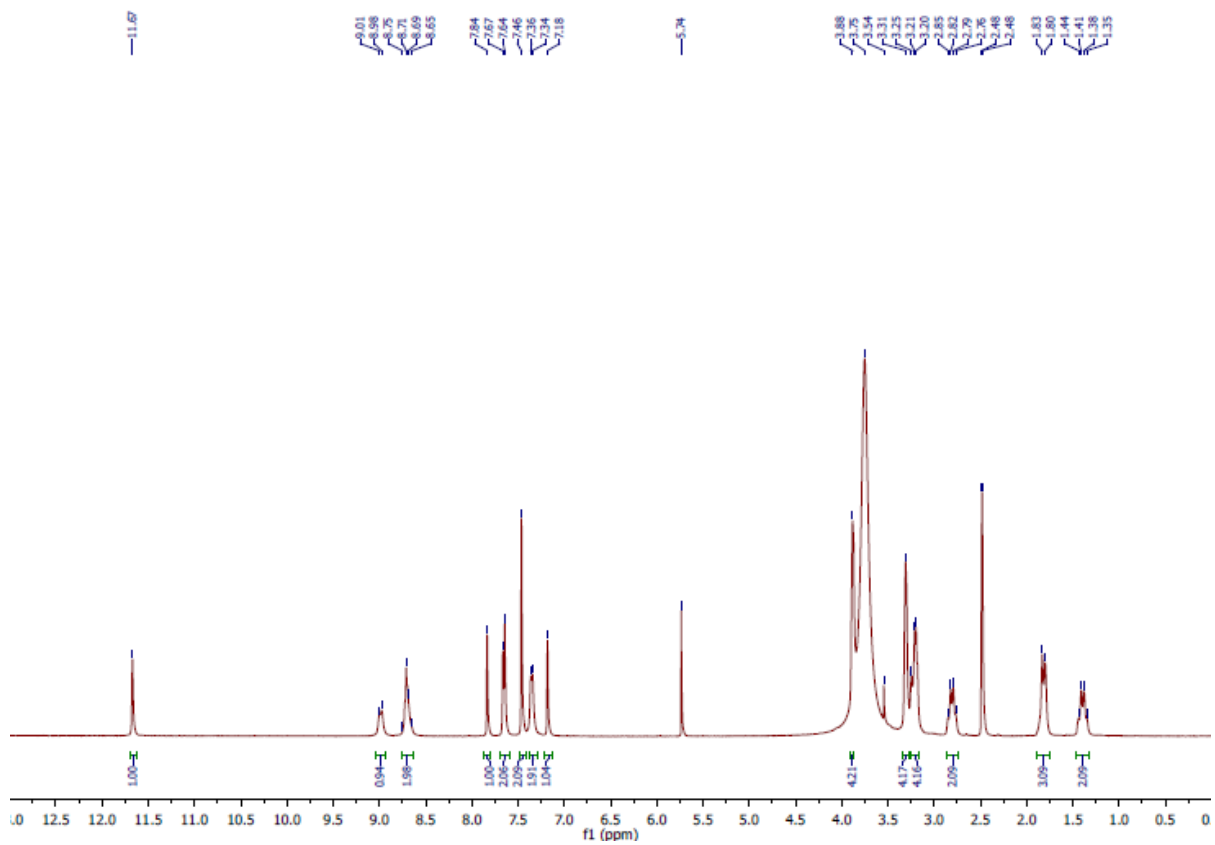

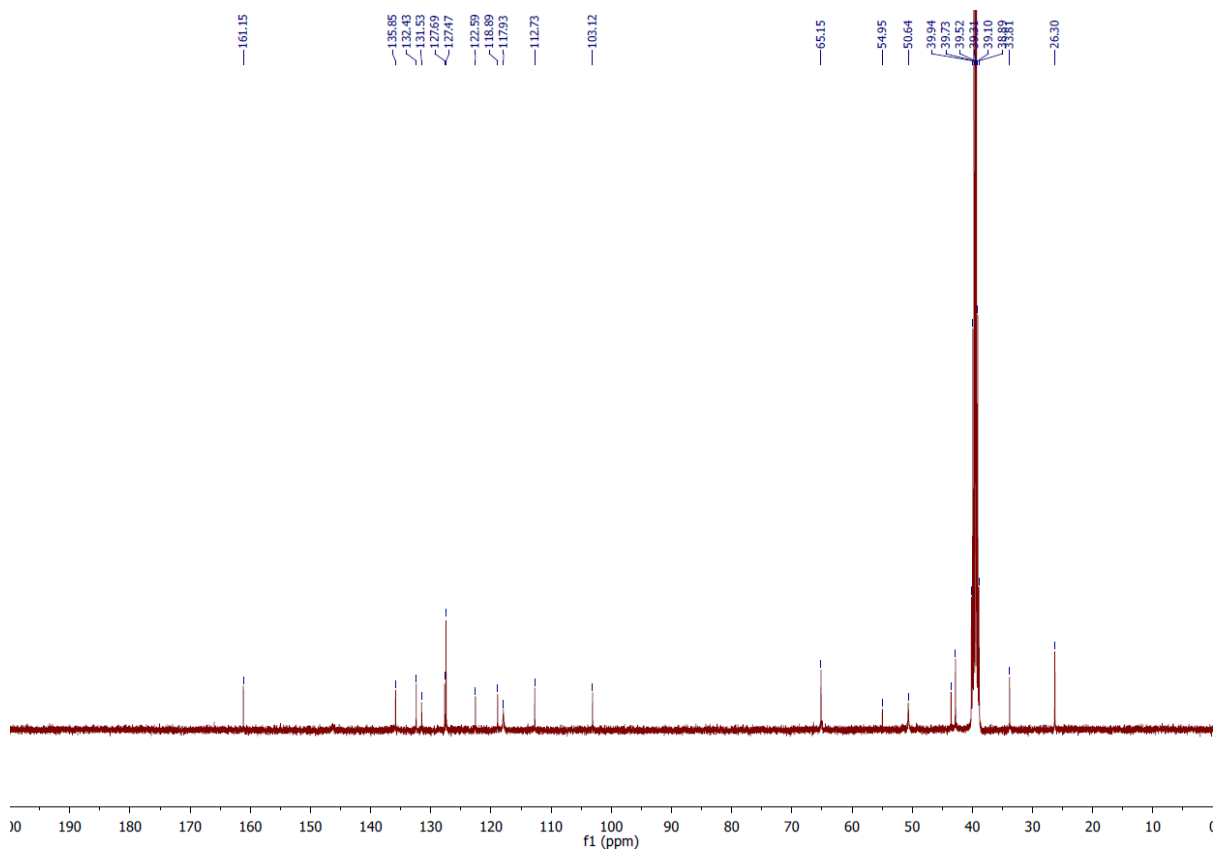

43. 5-(4-(Piperazin-1-yl)phenyl)-N-(piperidin-4-ylmethyl)-1H-indole-2-carboxamide Hydrochloride (**43**).

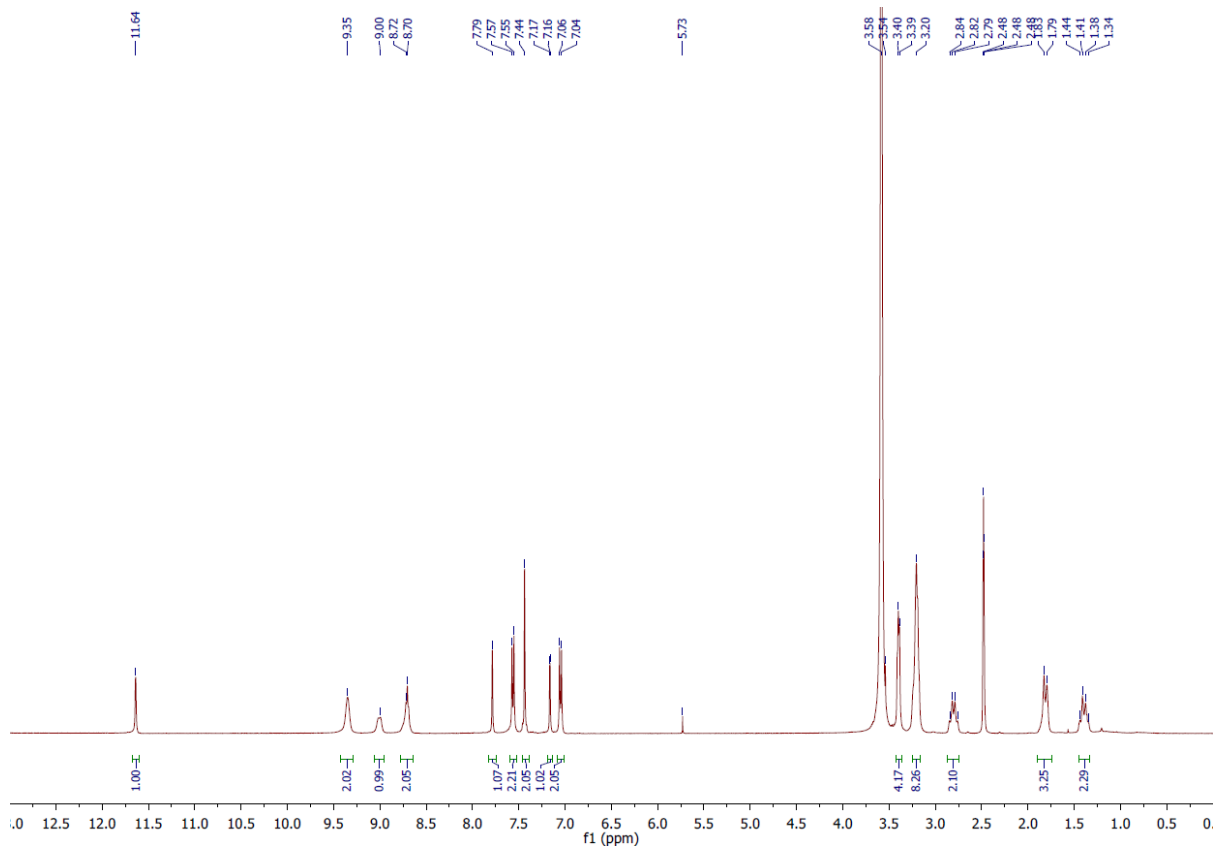

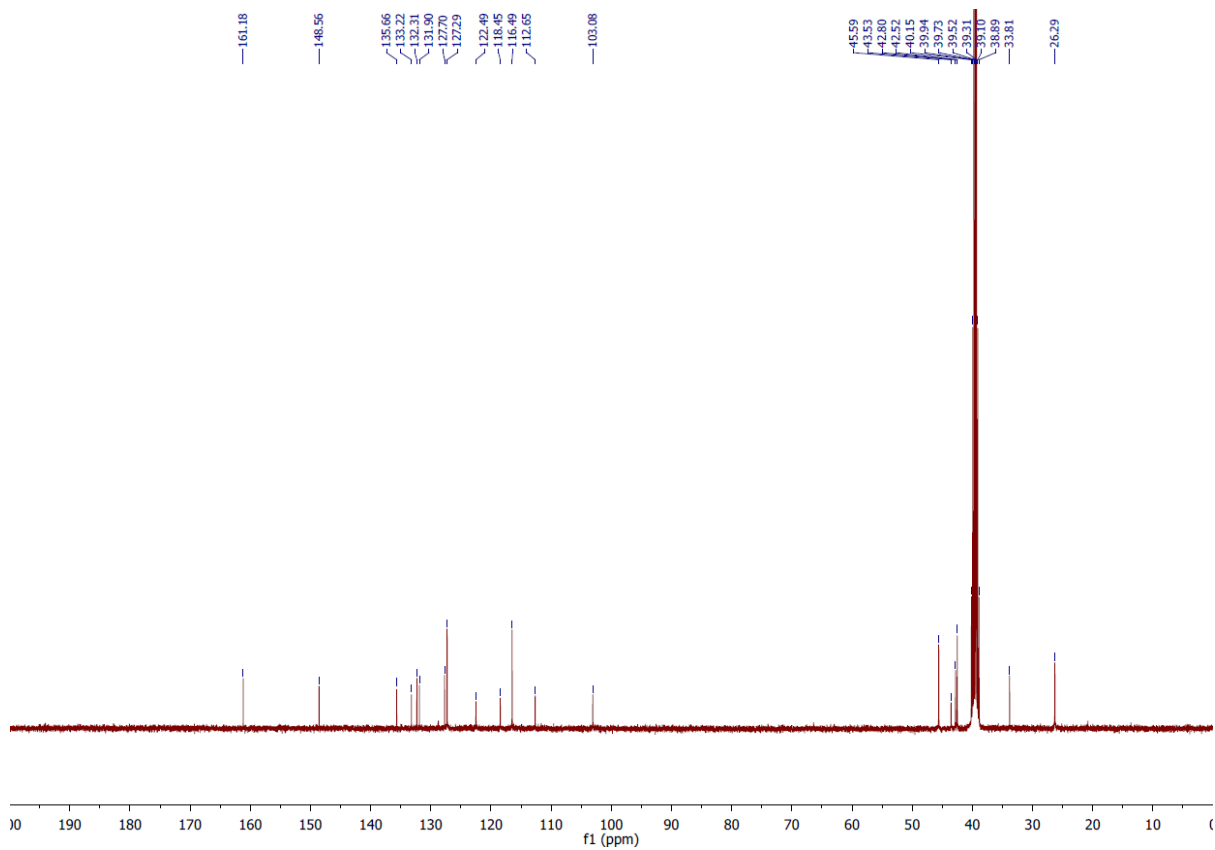

44. 5-(4-Cyanophenyl)-N-(piperidin-4-ylmethyl)-1H-indole-2-carboxamide Hydrochloride (44).

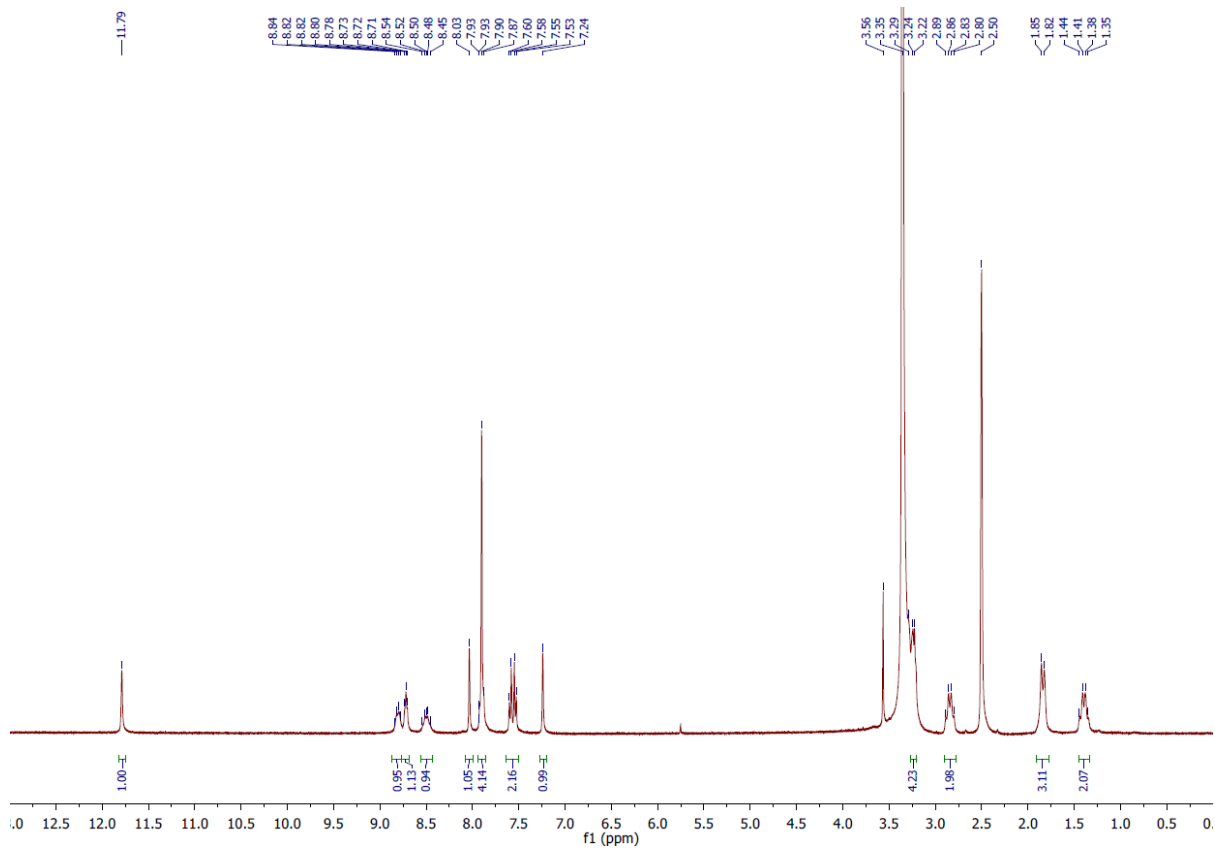

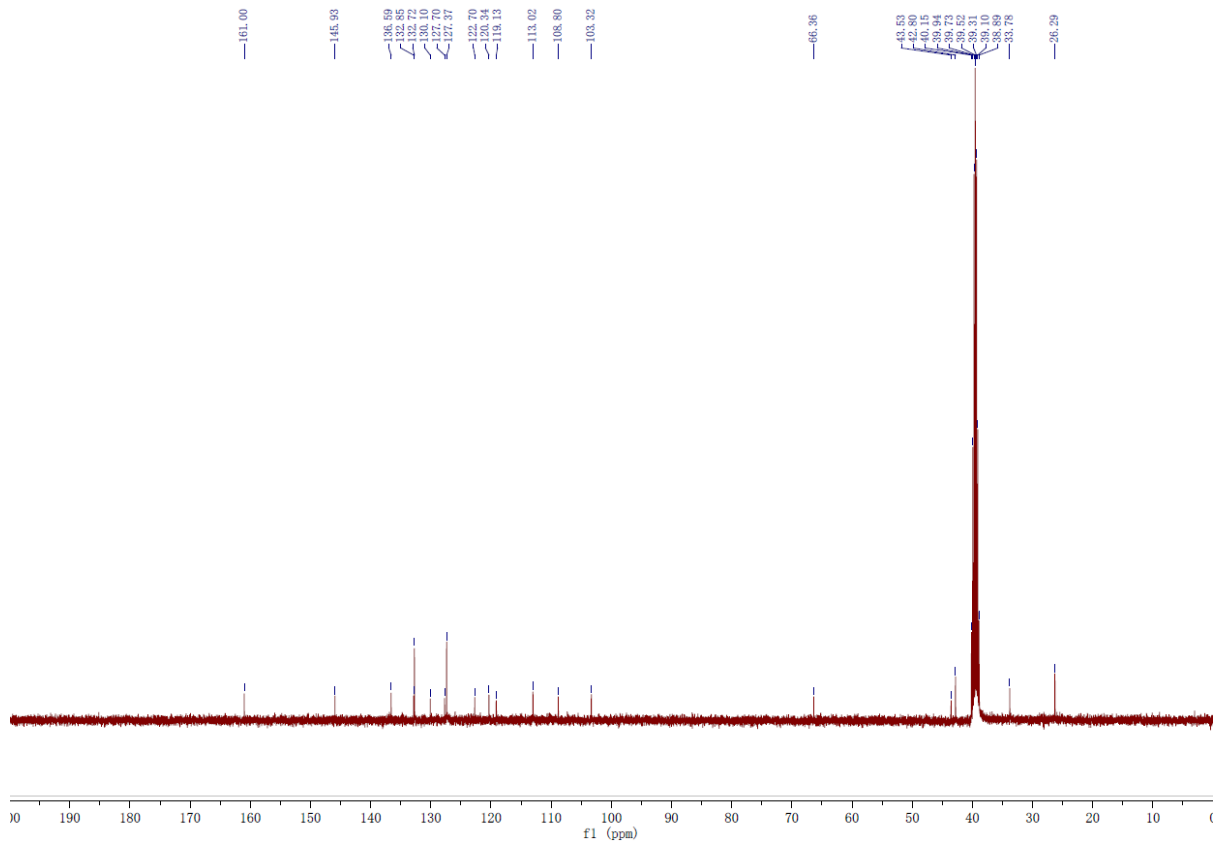

45. 5-(4-Cyano-2-methylphenyl)-N-(piperidin-4-ylmethyl)-1H-indole-2-carboxamide Hydrochloride (**45**).

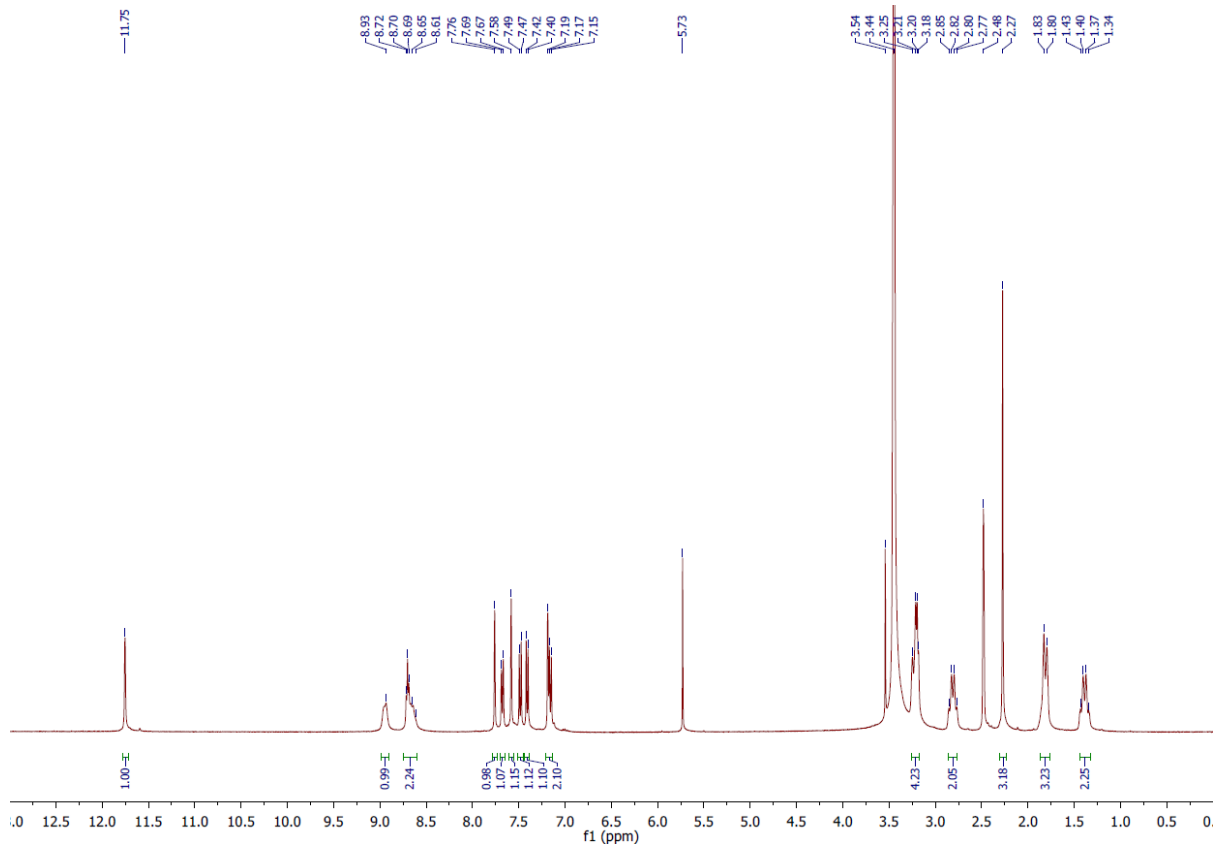



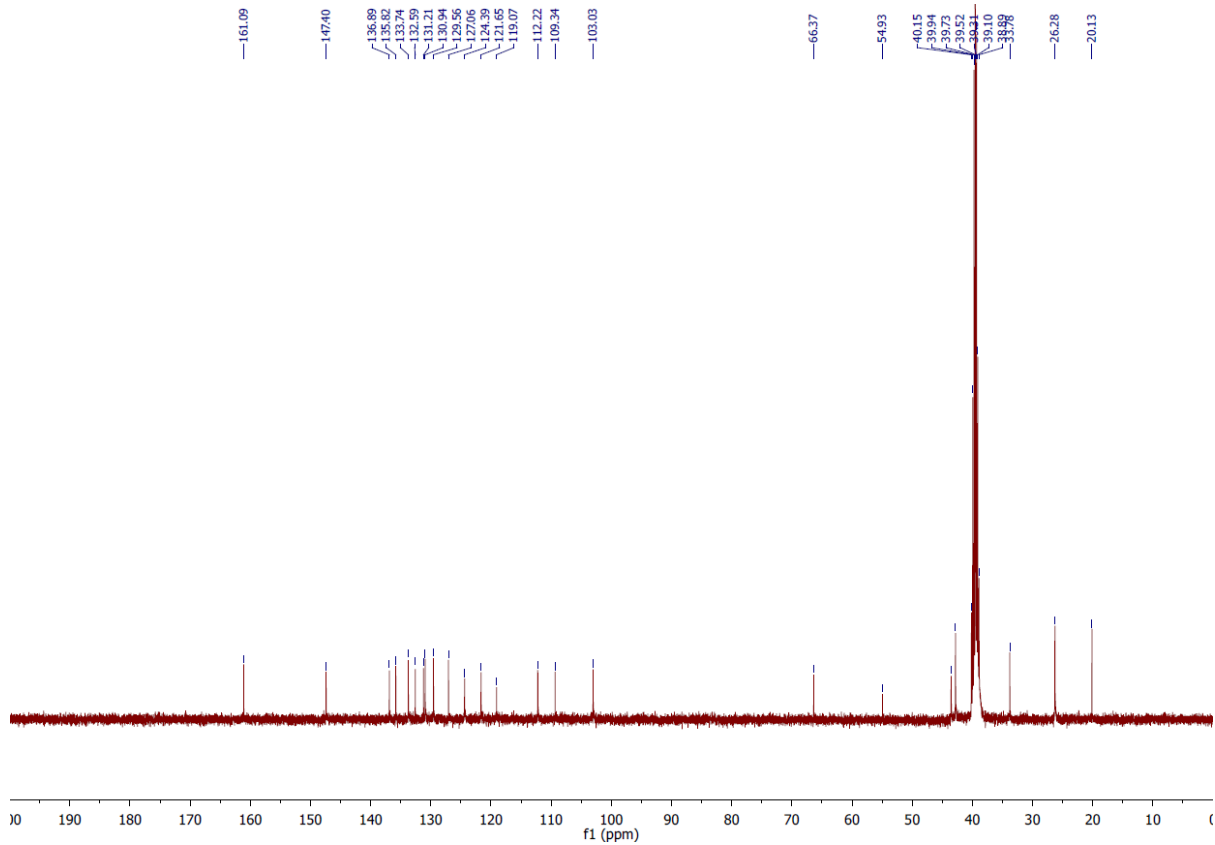

46. 5-(3-Cyanophenyl)-N-(piperidin-4-ylmethyl)-1H-indole-2-carboxamide Hydrochloride (46).

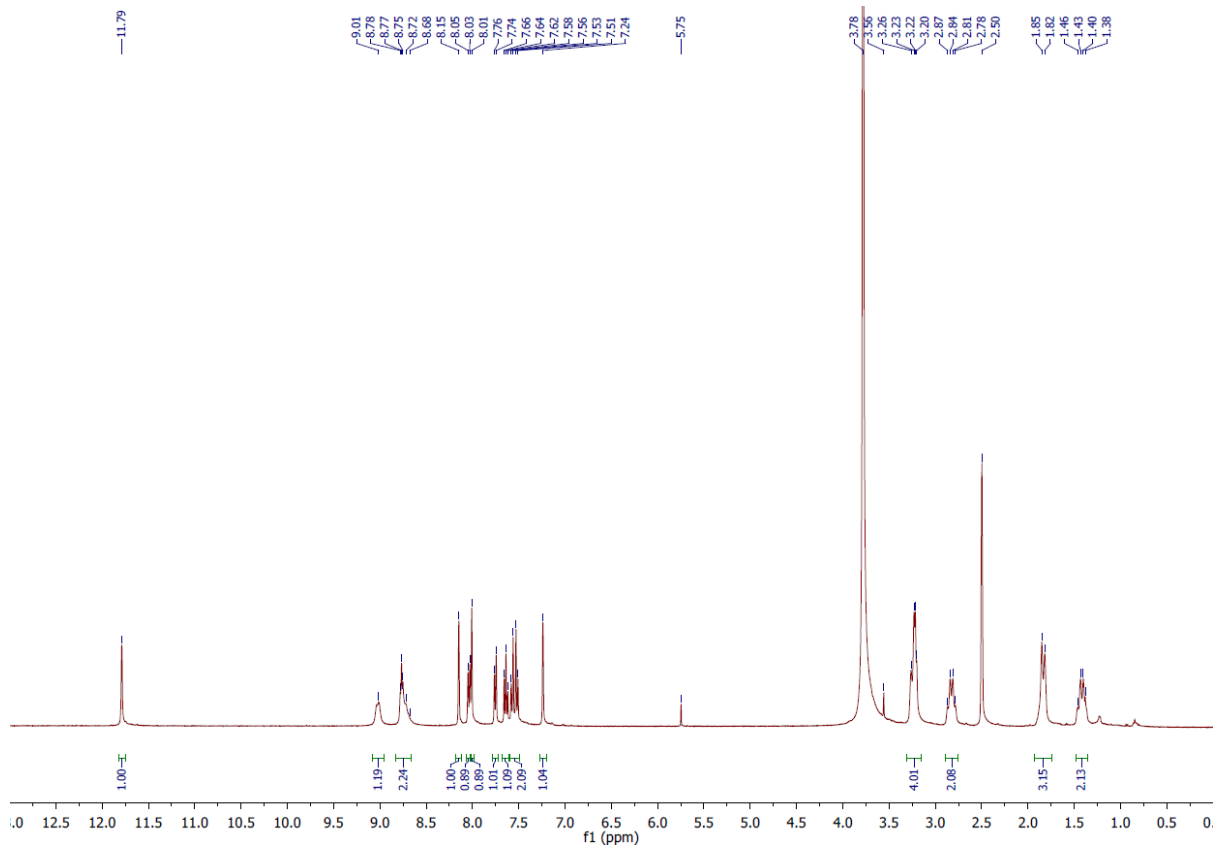

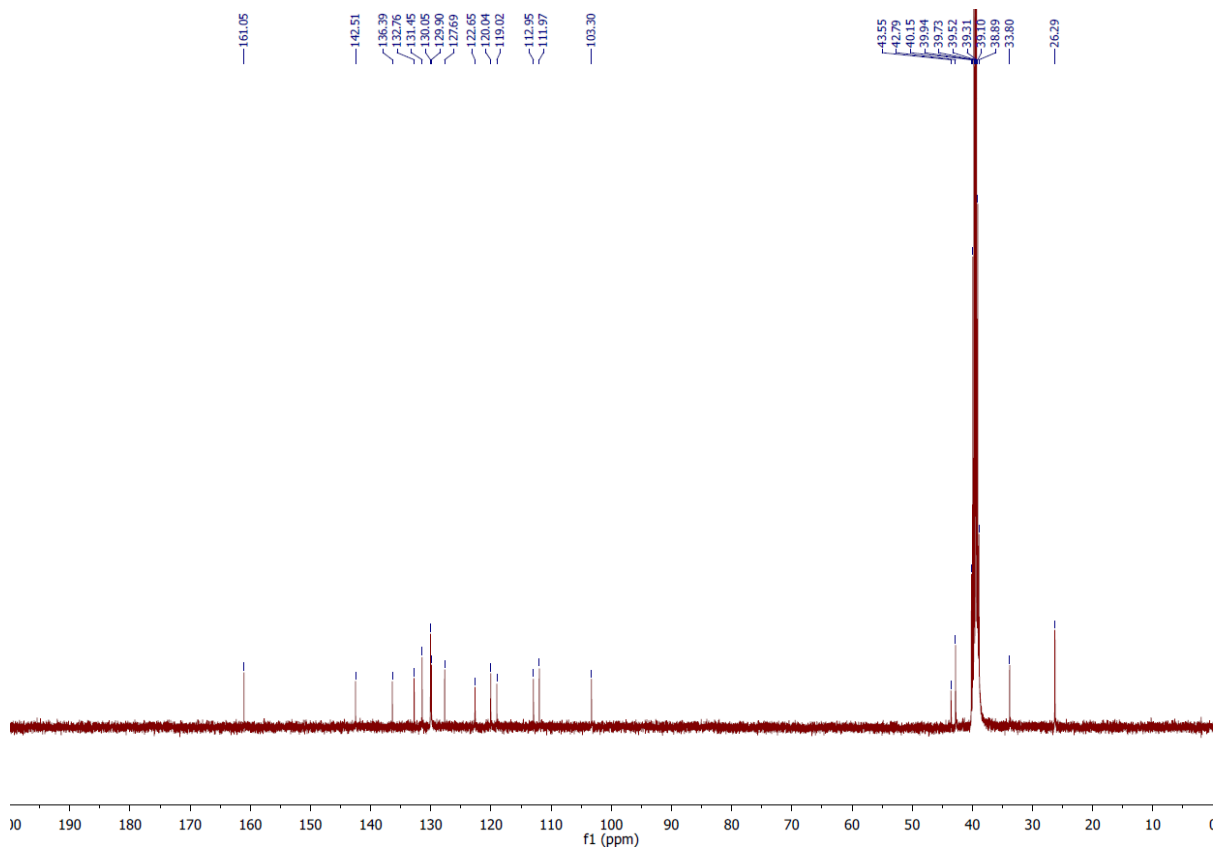

47. N-(Piperidin-4-ylmethyl)-1H-indole-2-carboxamide Hydrochloride (47).

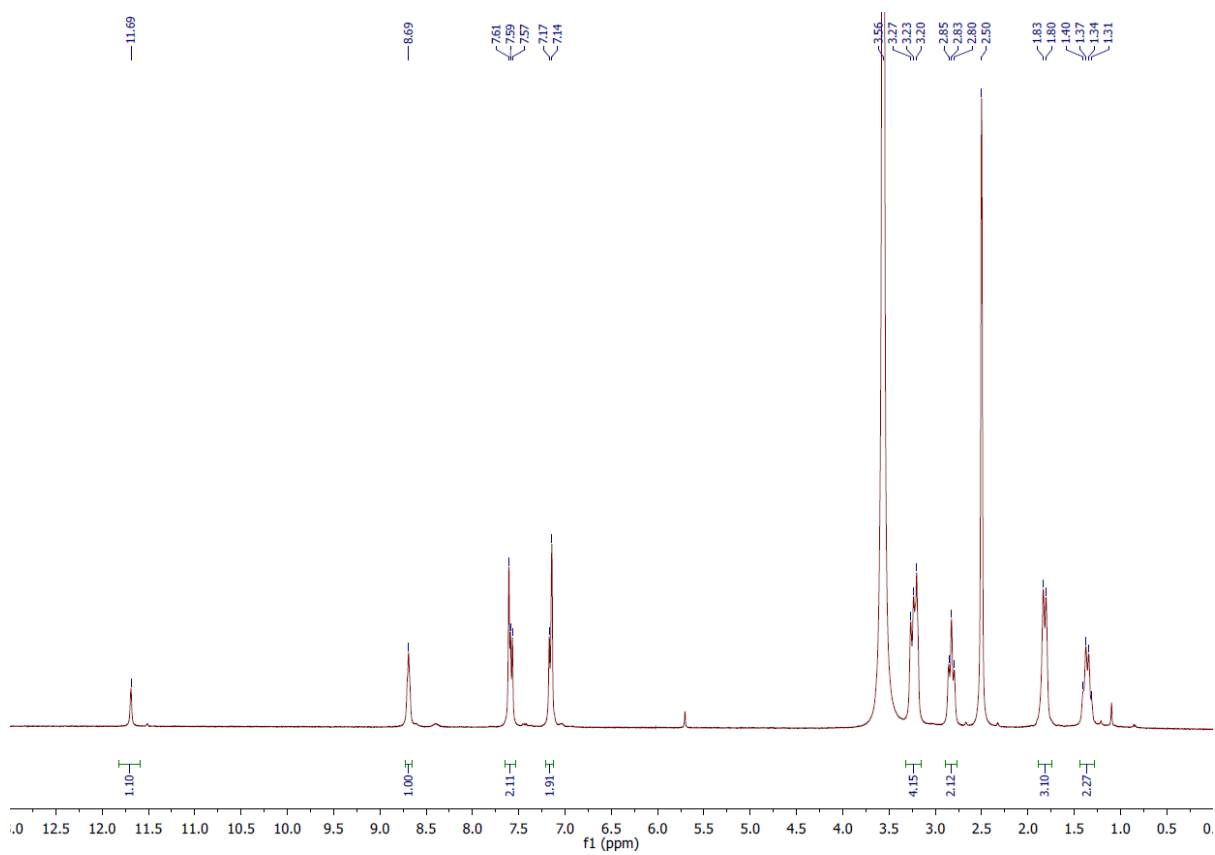

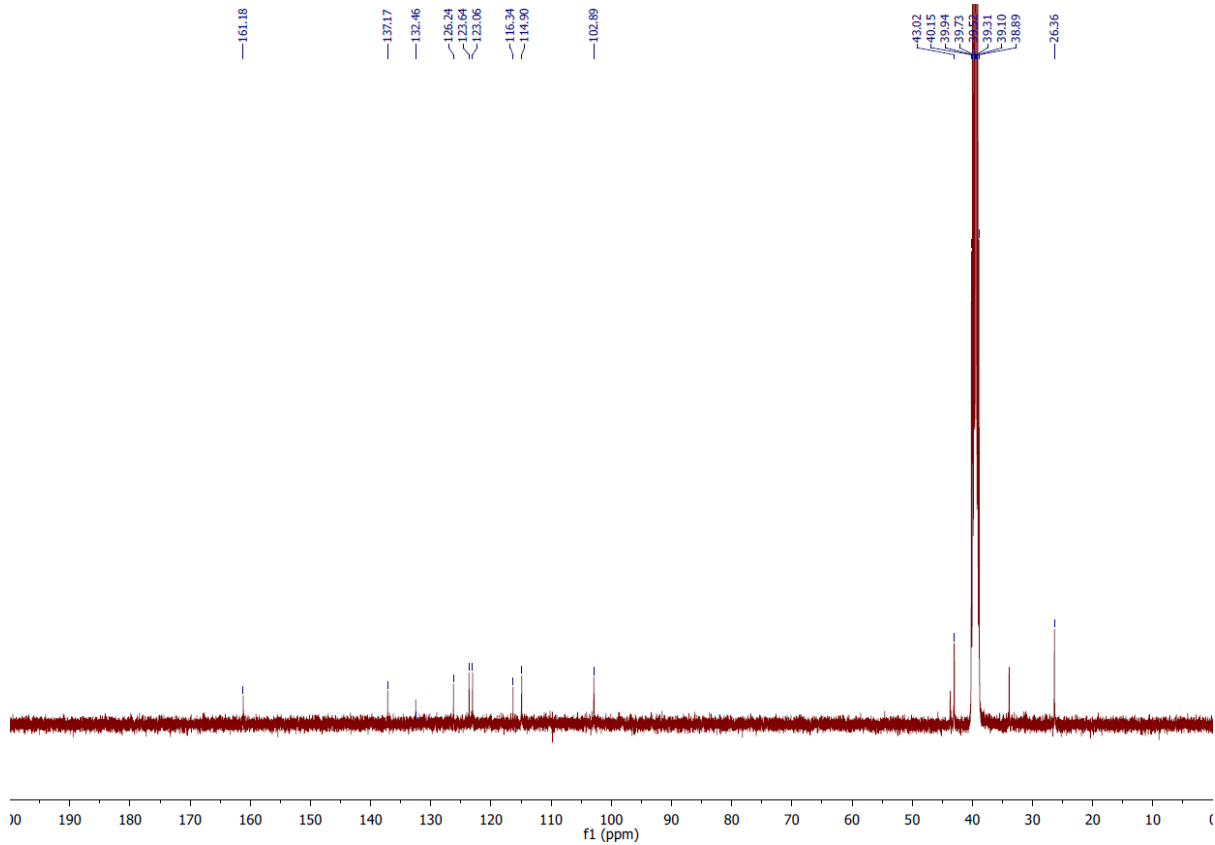

48. 6-Phenyl-N-(piperidin-4-ylmethyl)-1H-indole-2-carboxamide Hydrochloride (**48**)

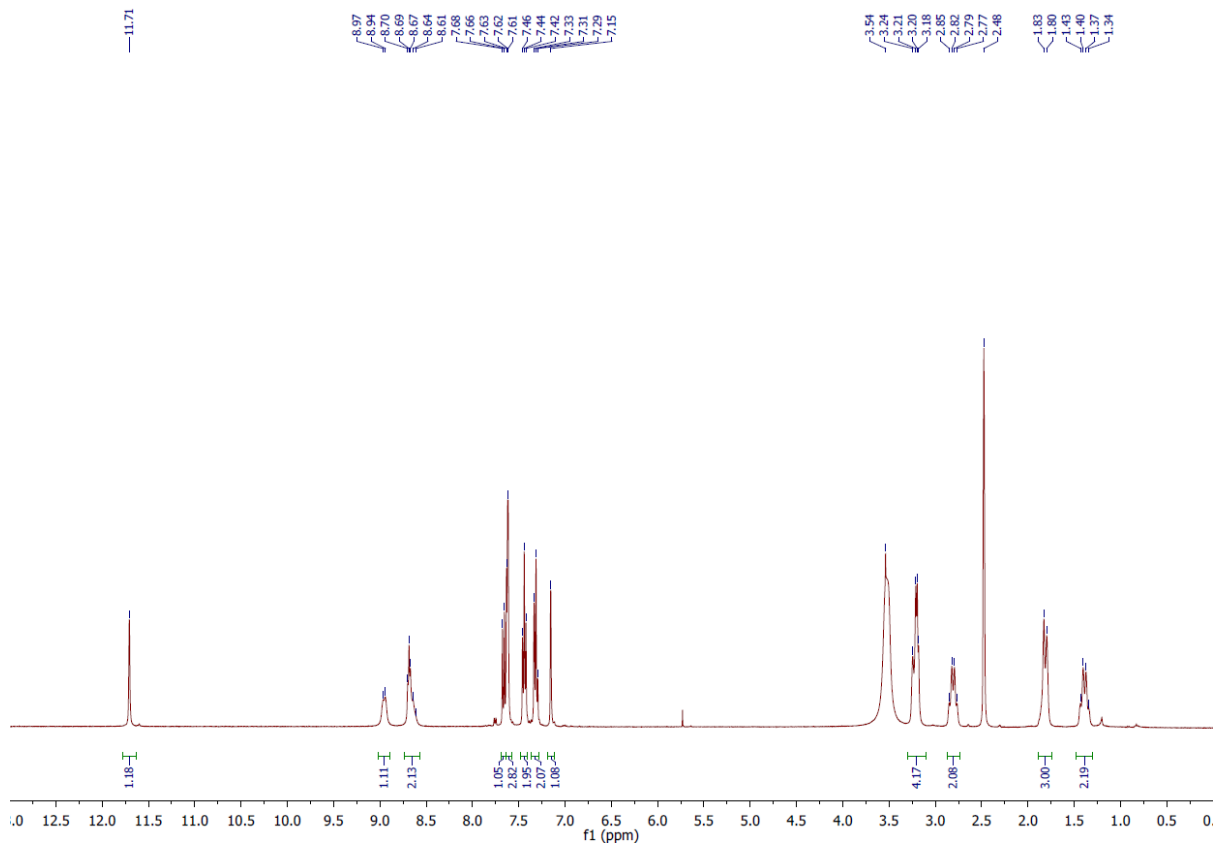

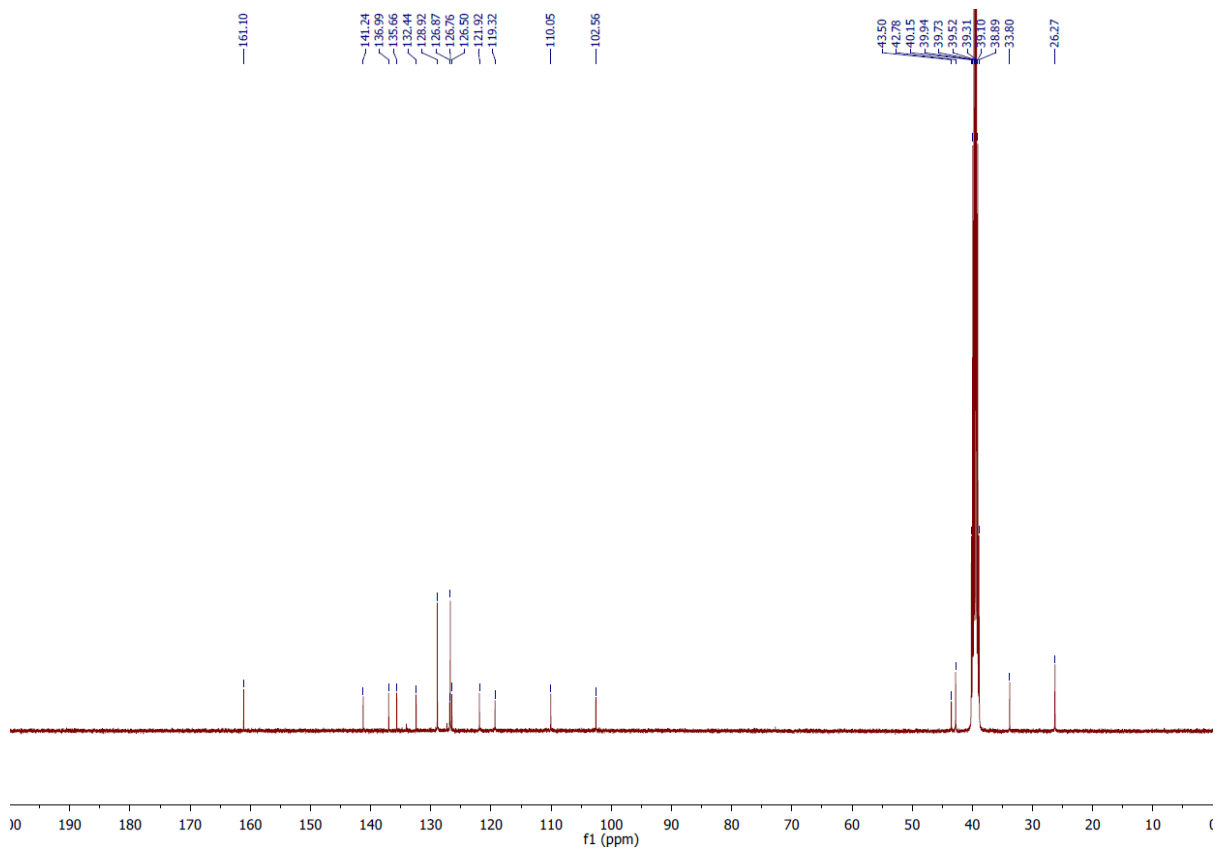

49. 6-(4-Fluorophenyl)-N-(piperidin-4-ylmethyl)-1H-indole-2-carboxamide Hydrochloride (49).

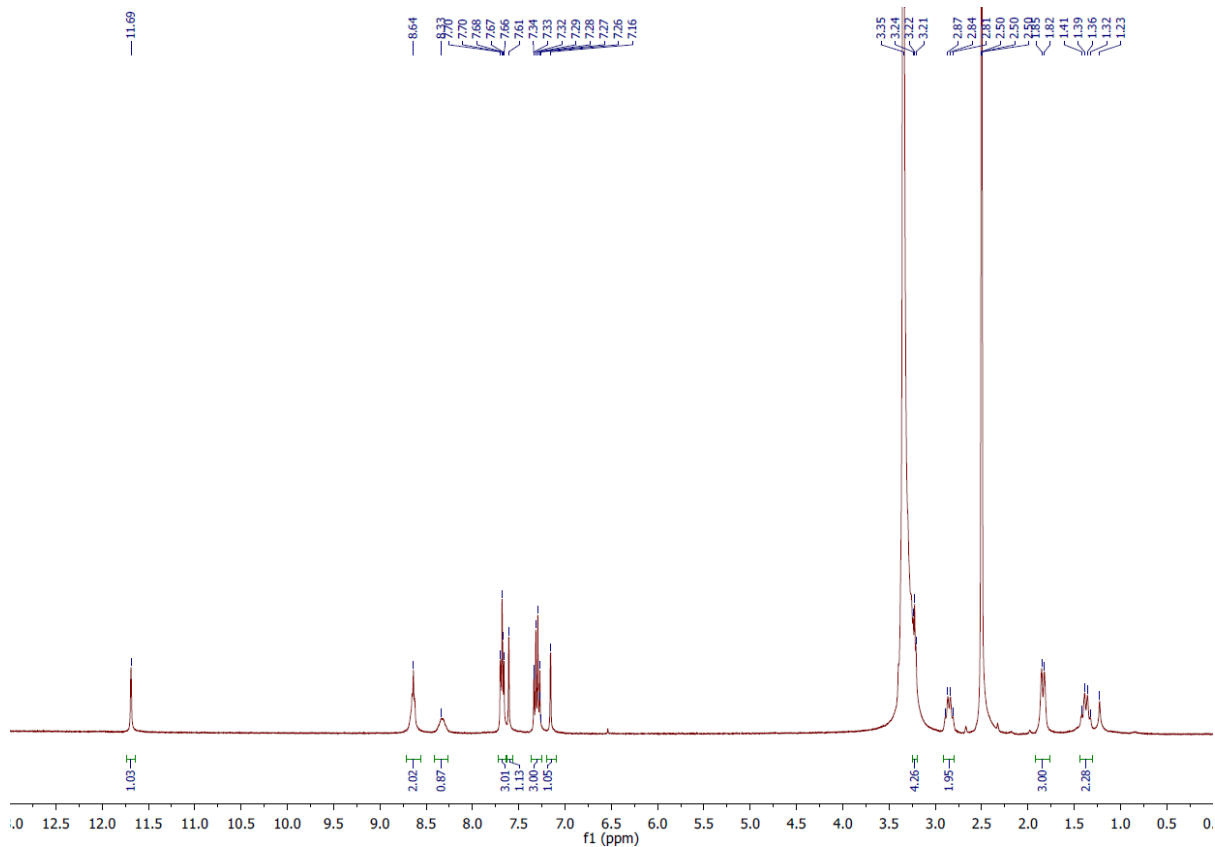

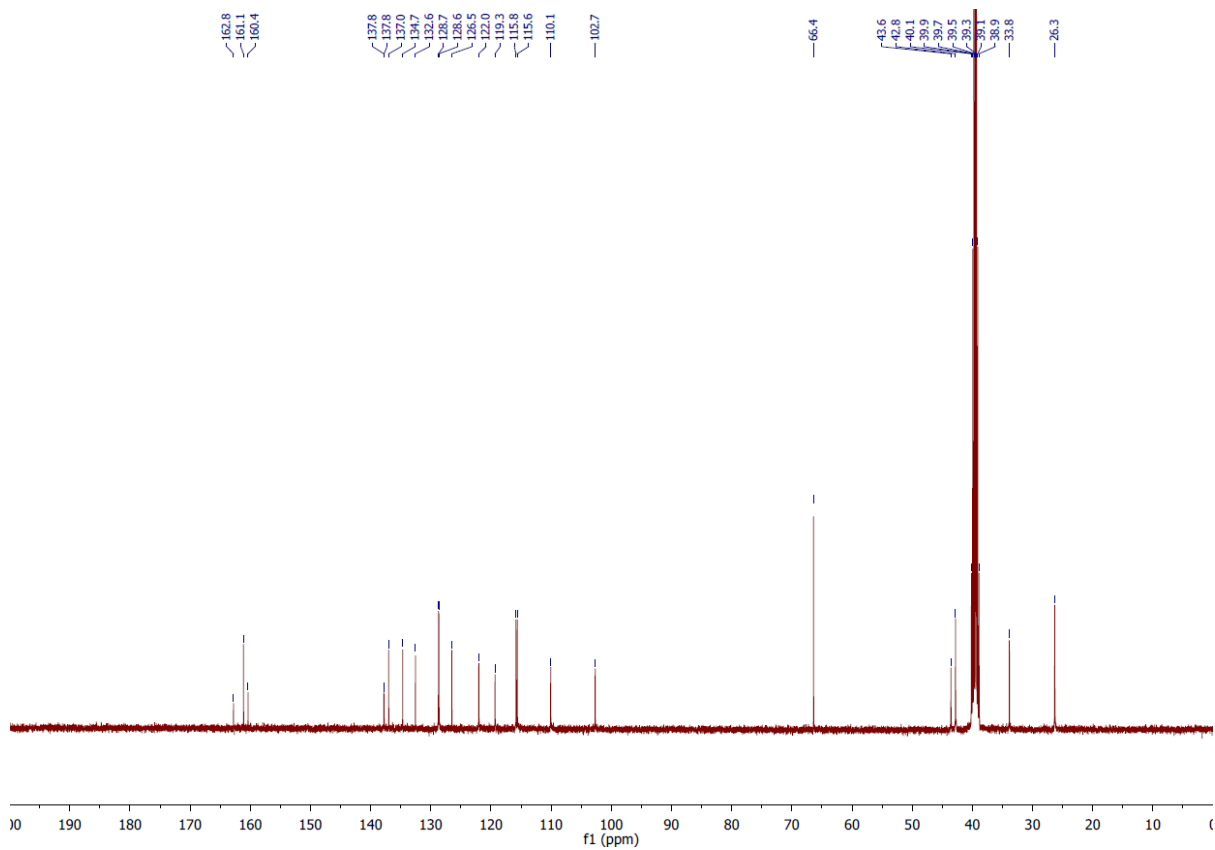

50. 6-(4-Methoxyphenyl)-N-(piperidin-4-ylmethyl)-1H-indole-2-carboxamide Hydrochloride (50).

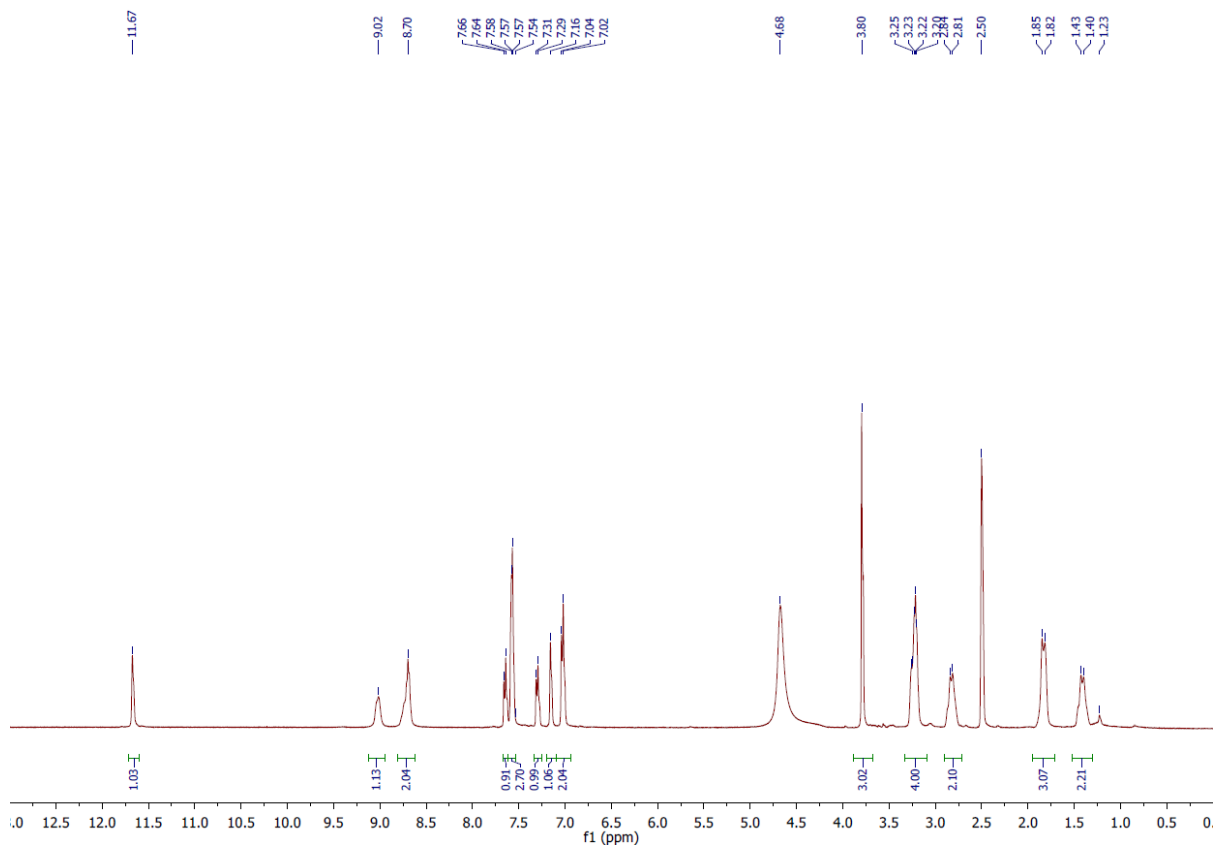

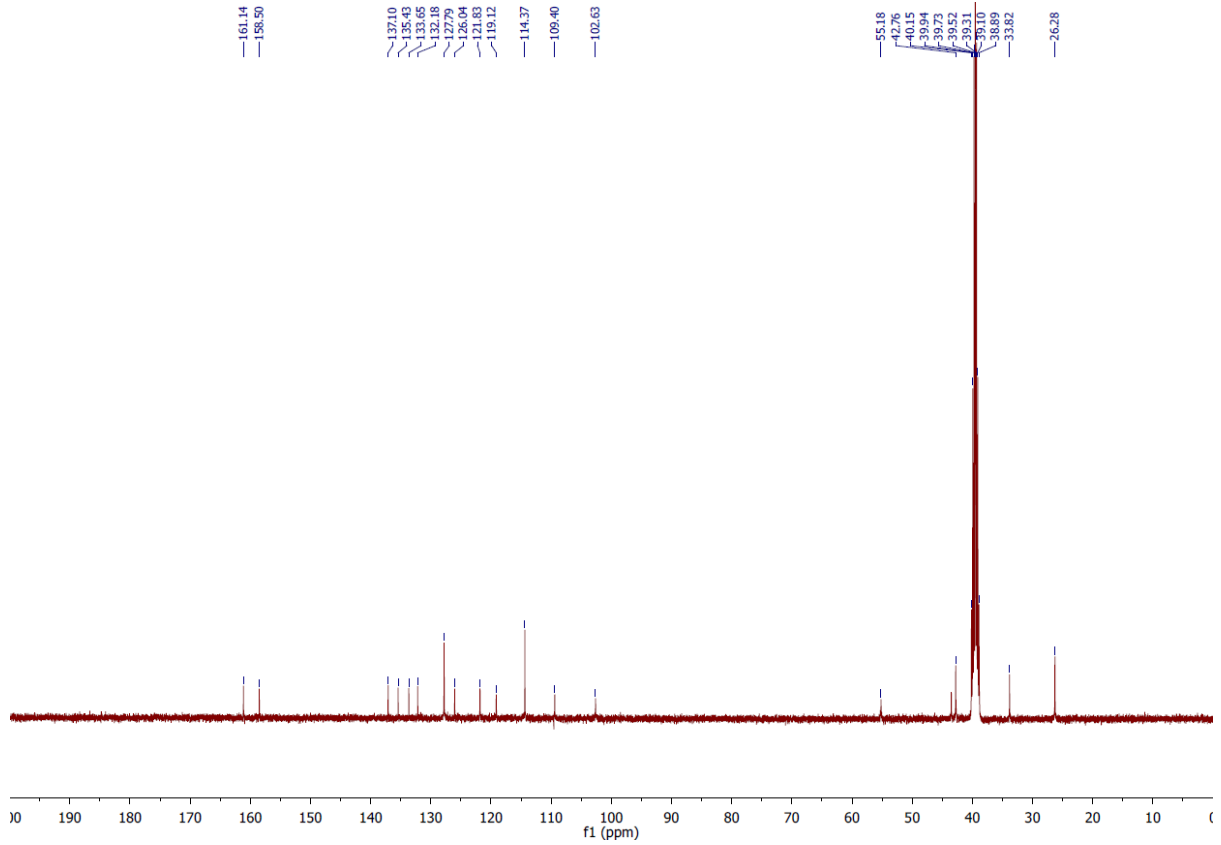

51. N-(Piperidin-4-ylmethyl)-6-(4-(trifluoromethoxy)phenyl)-1H-indole-2-carboxamide Hydrochloride (**51**).

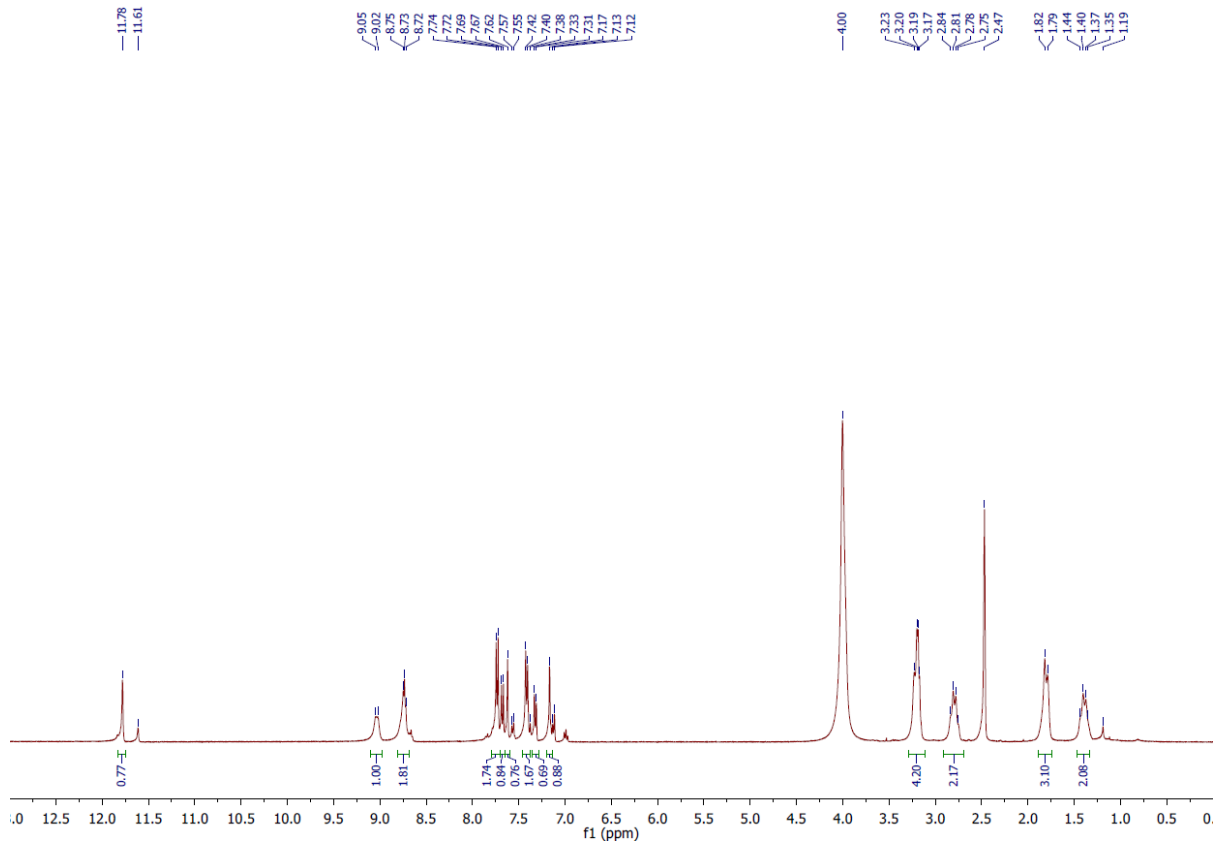

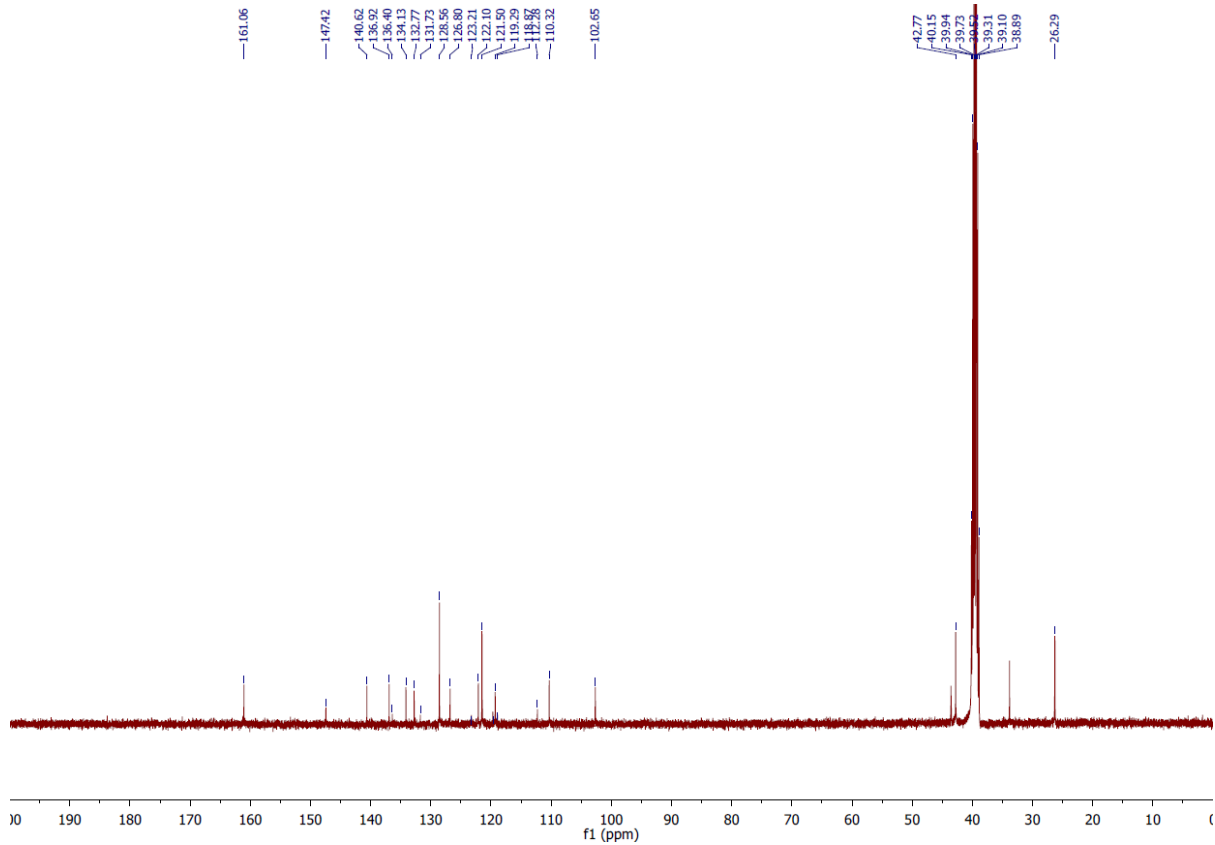

52. 6-(4-(Aminomethyl)phenyl)-N-(piperidin-4-ylmethyl)-1H-indole-2-carboxamide Hydrochloride (**52**).

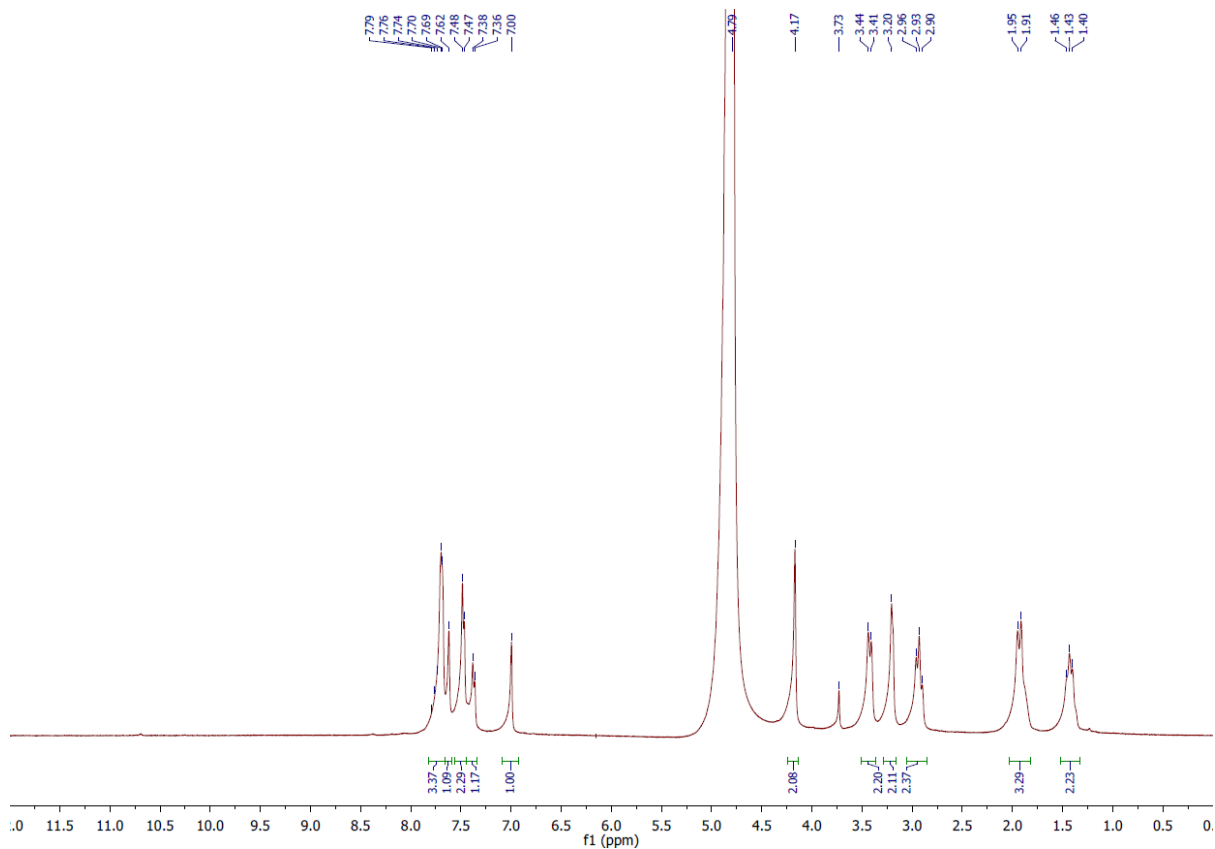

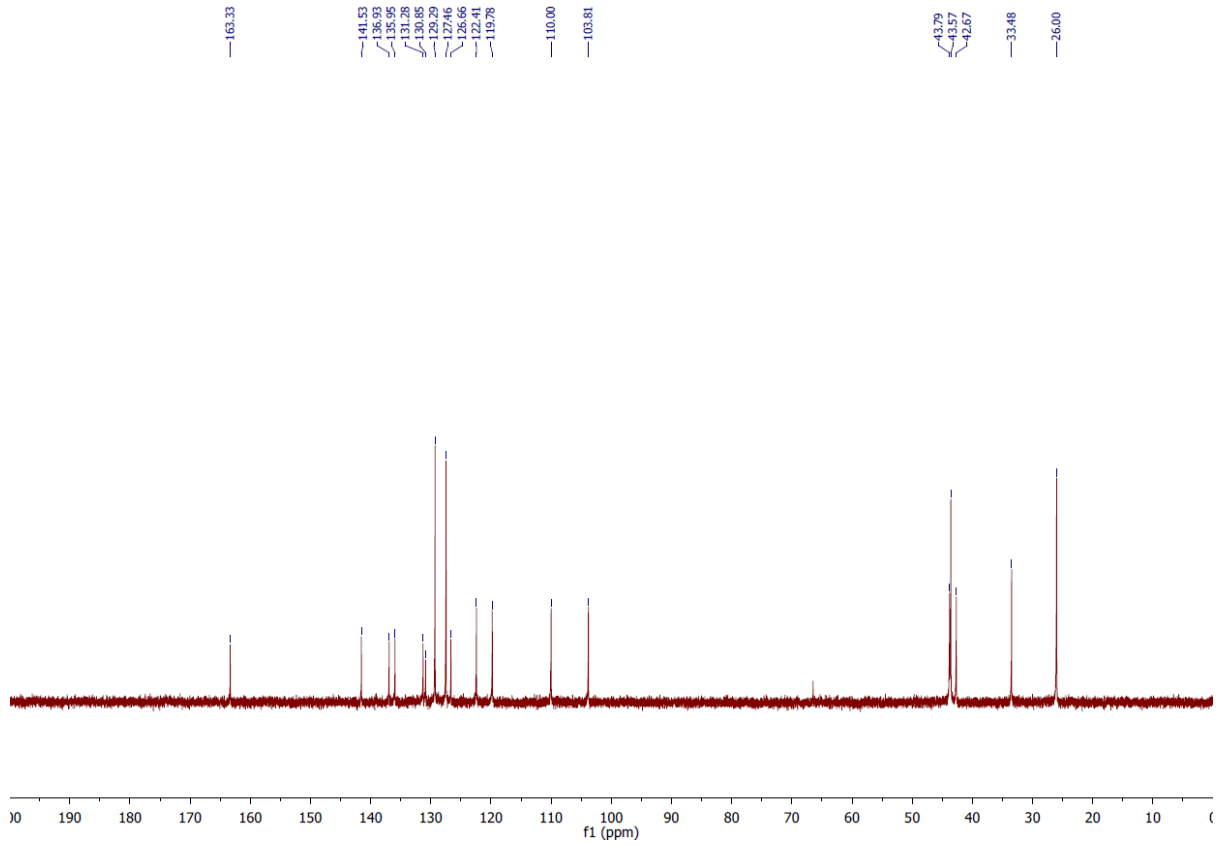

53. 6-(4-Carbamoylphenyl)-N-(piperidin-4-ylmethyl)-1H-indole-2-carboxamide Hydrochloride (**53**).

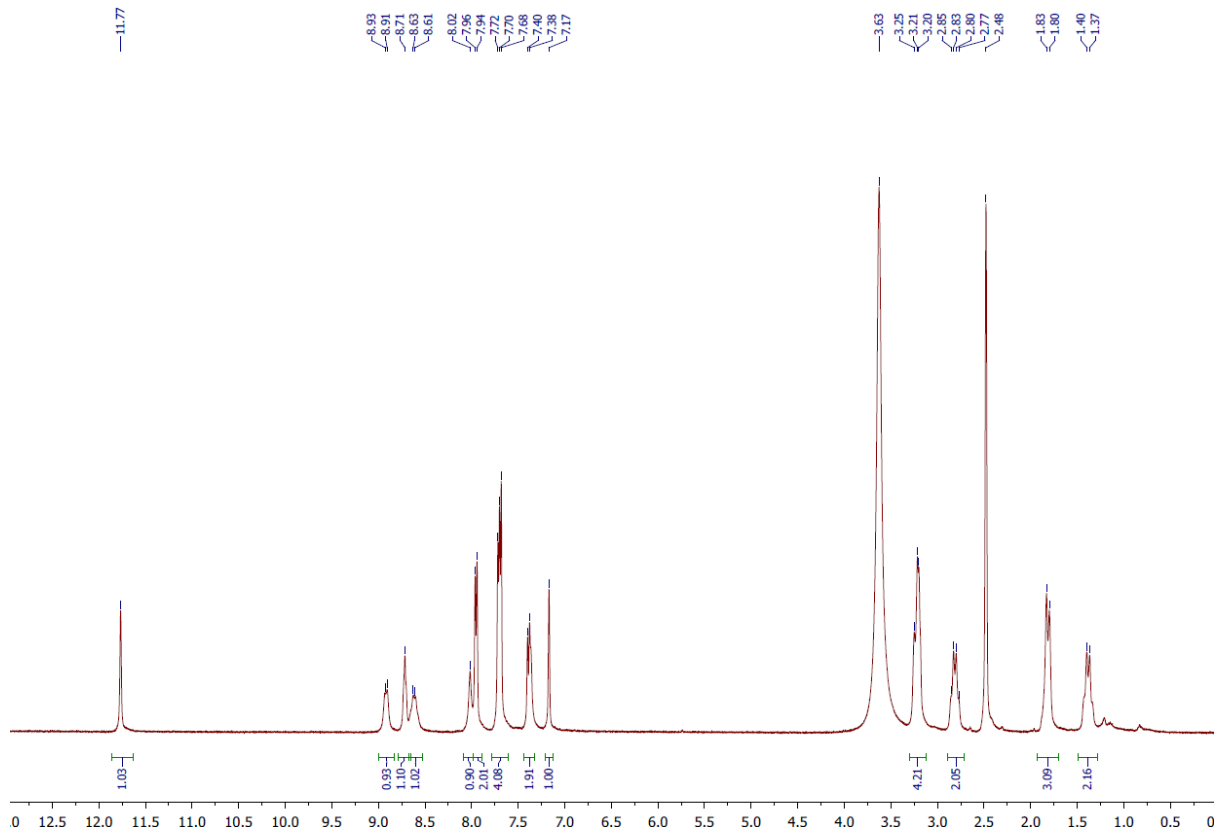



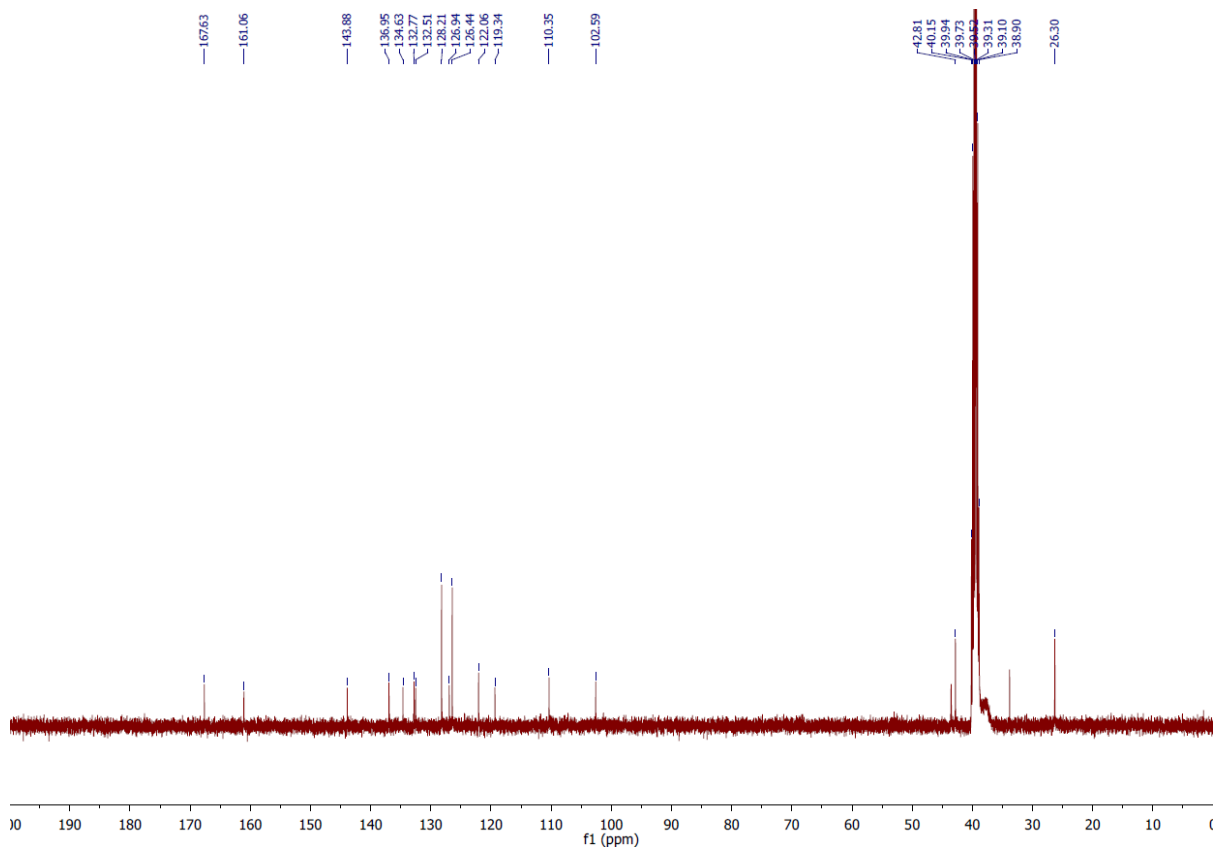

54. 6-(4-(Hydroxymethyl)phenyl)-N-(piperidin-4-ylmethyl)-1H-indole-2-carboxamide Hydrochloride (**54**).

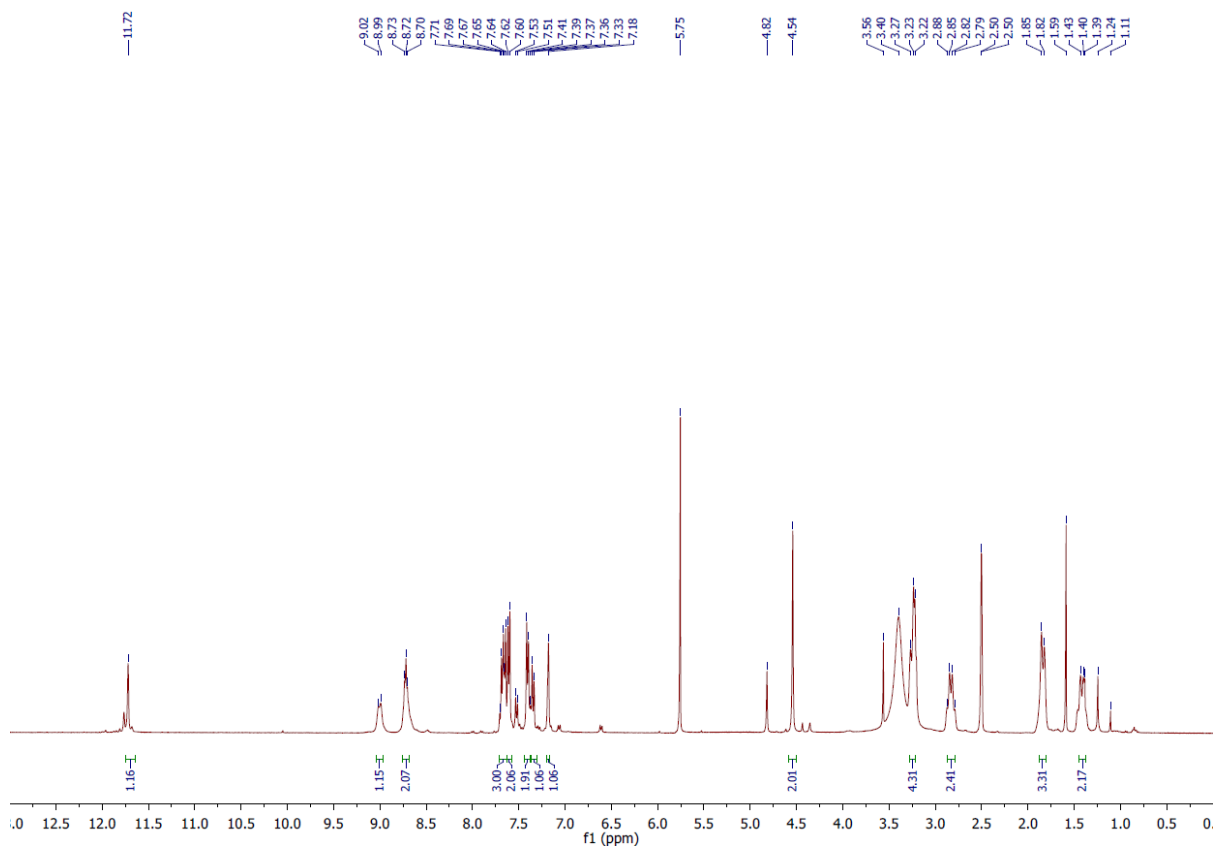

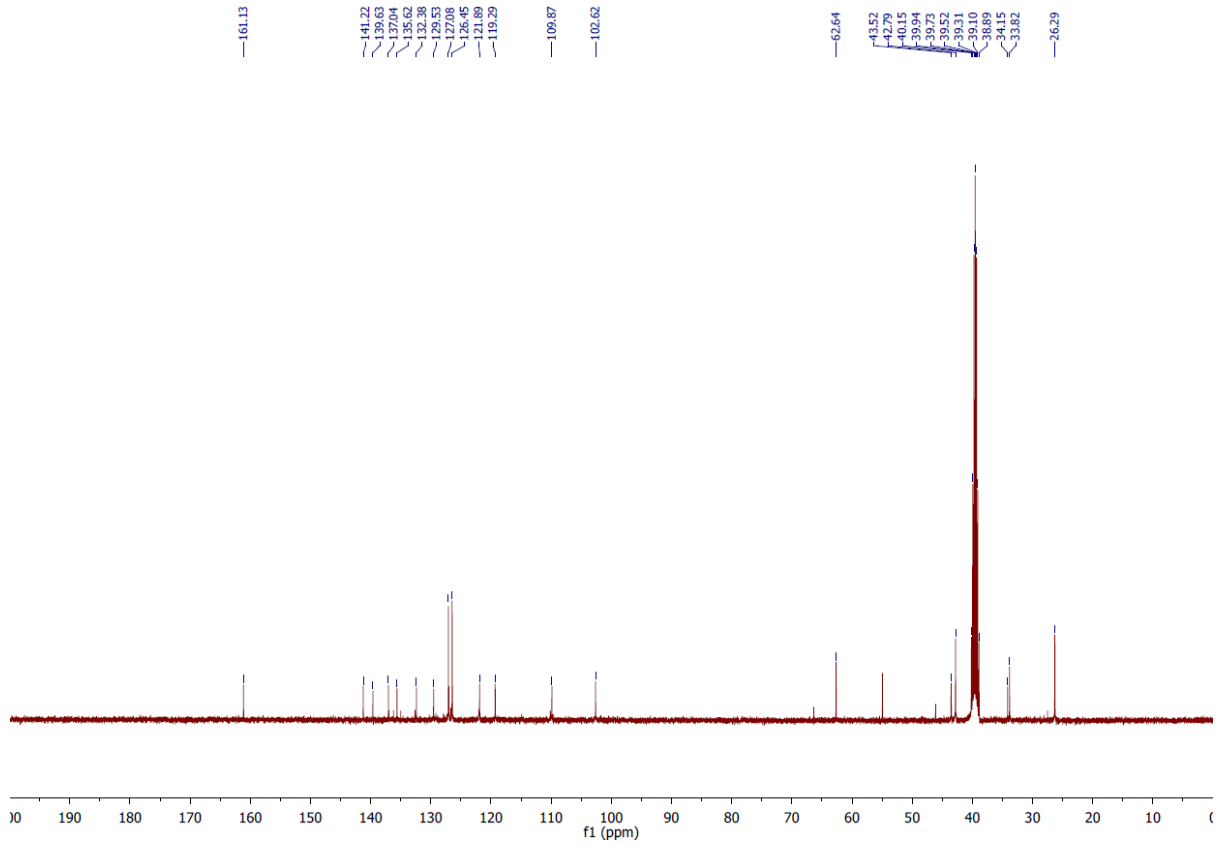

55. 6-(4-(2-Hydroxyethyl)phenyl)-N-(piperidin-4-ylmethyl)-1H-indole-2-carboxamide Hydrochloride (**55**).

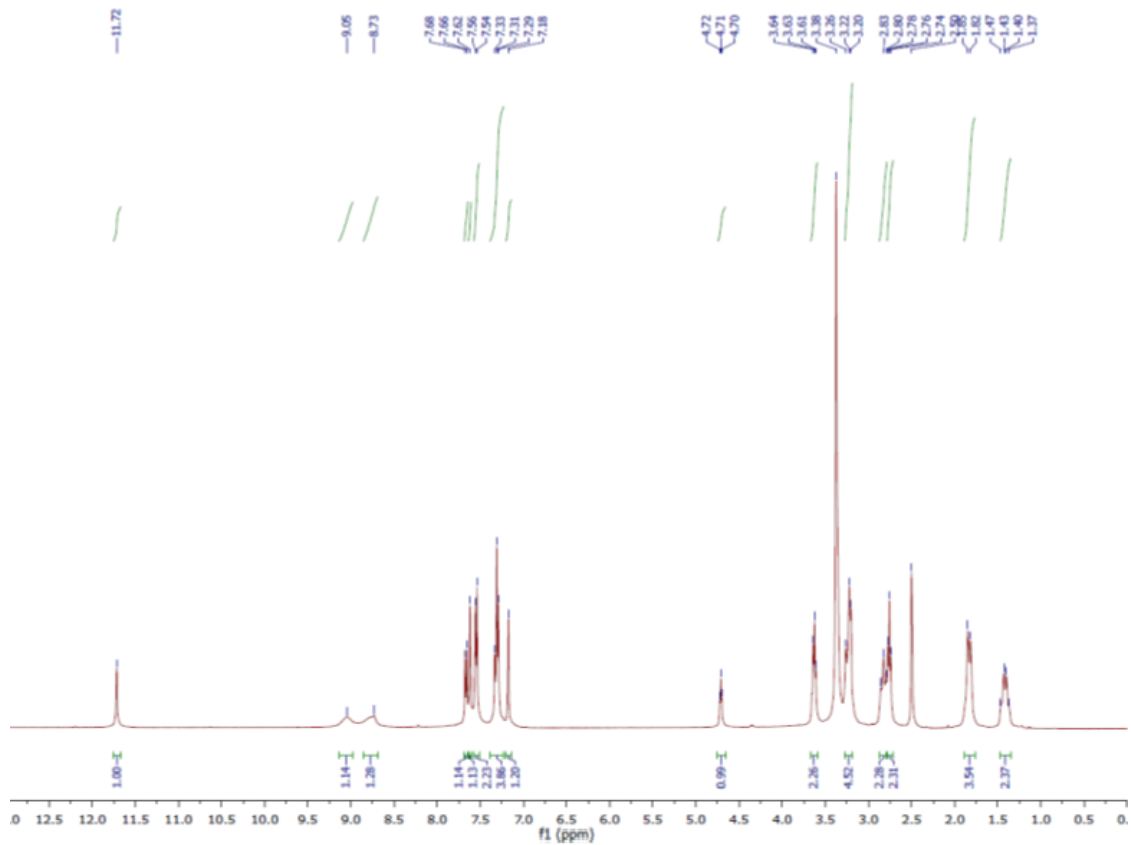

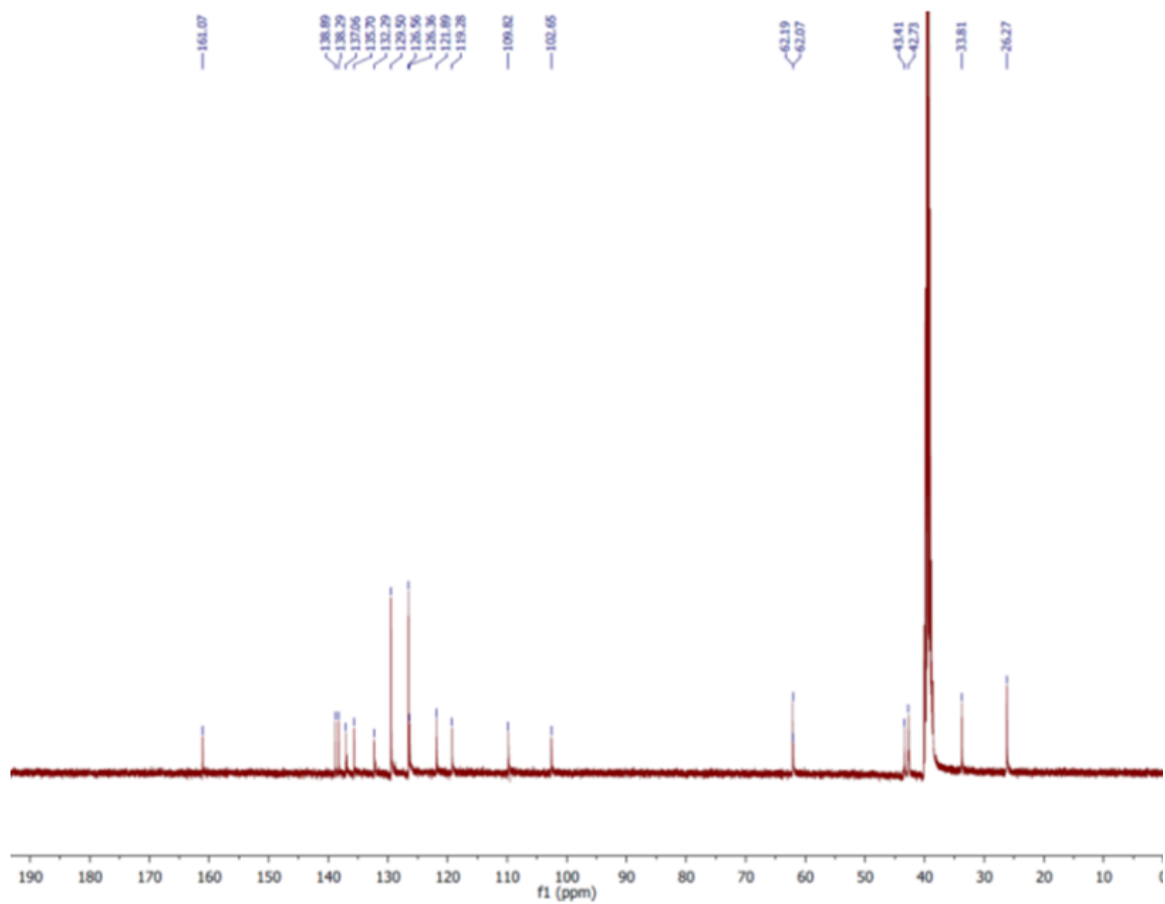

56. 6-(4-Phenoxyphenyl)-N-(piperidin-4-ylmethyl)-1H-indole-2-carboxamide Hydrochloride (**56**).

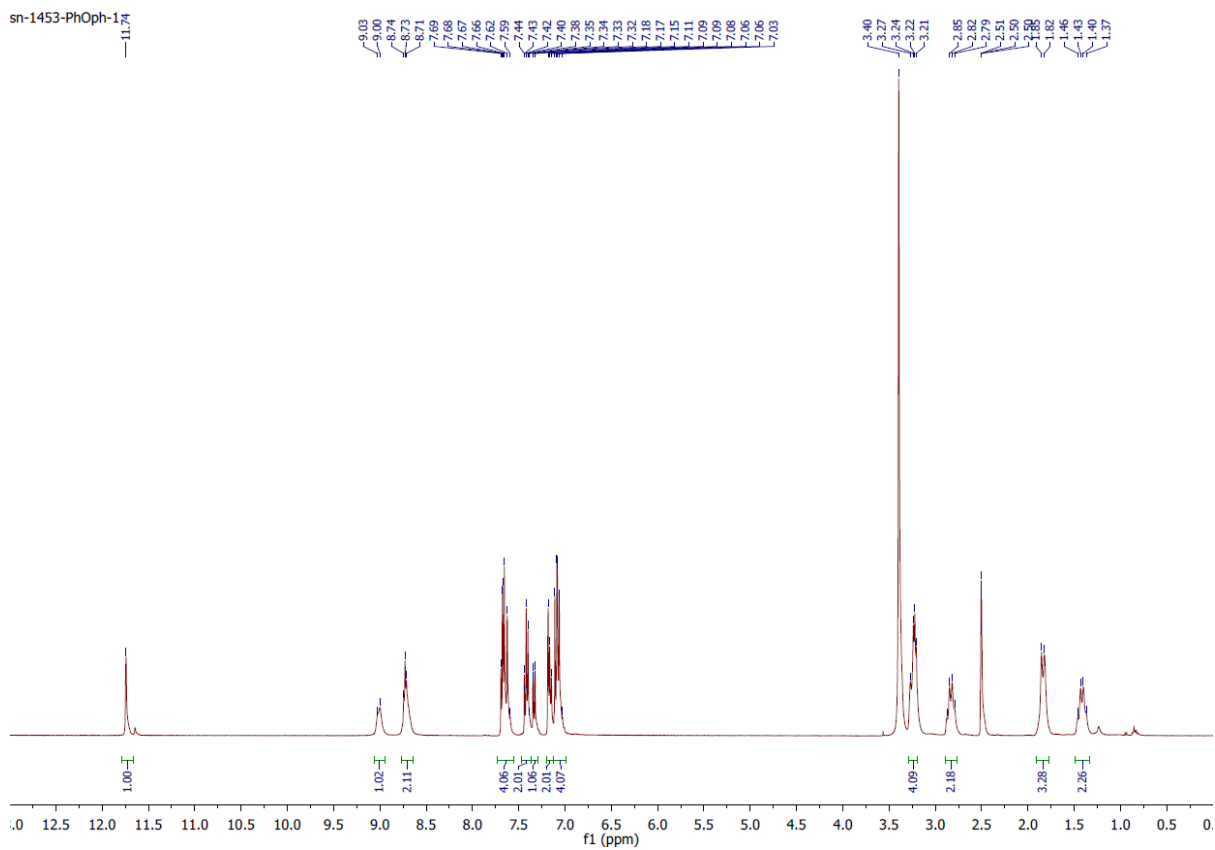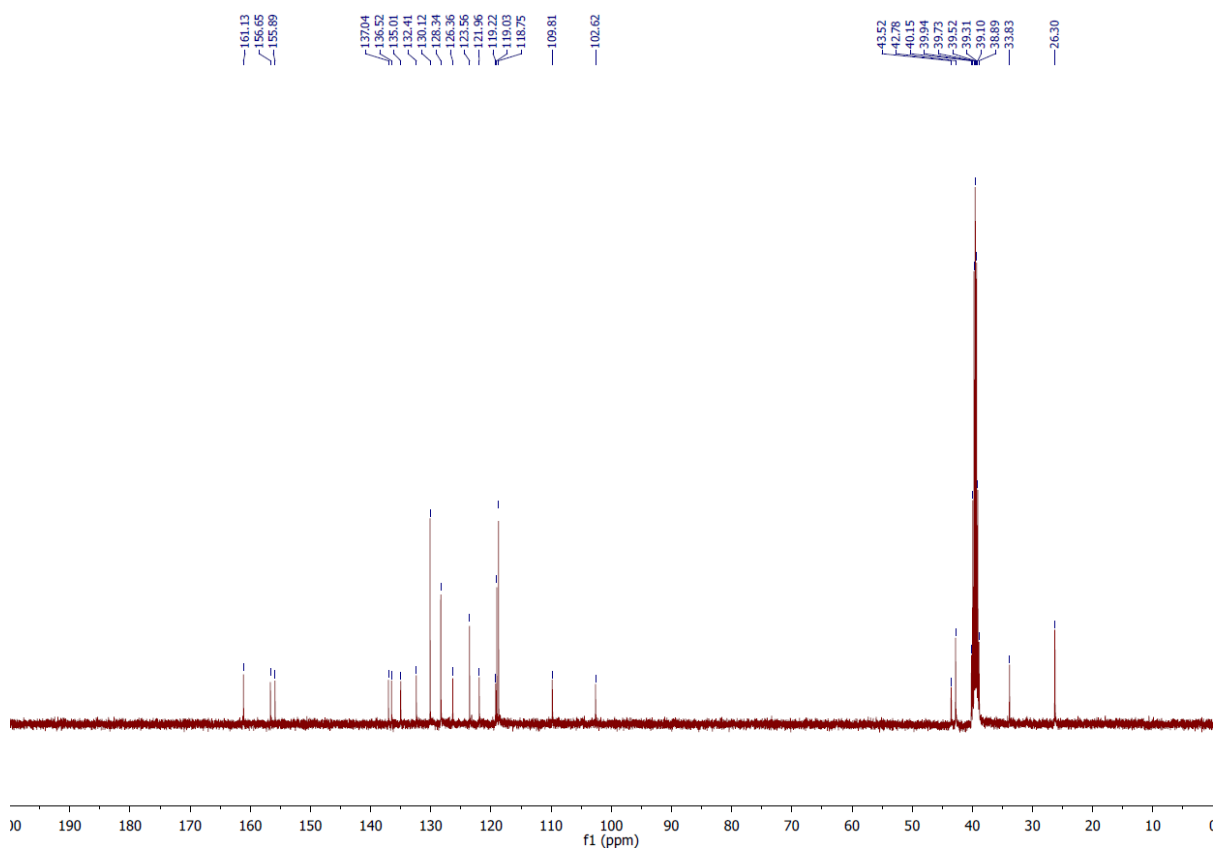

57. 6-(4-(Piperazin-1-yl)phenyl)-N-(piperidin-4-ylmethyl)-1H-indole-2-carboxamide Hydrochloride (**57**).

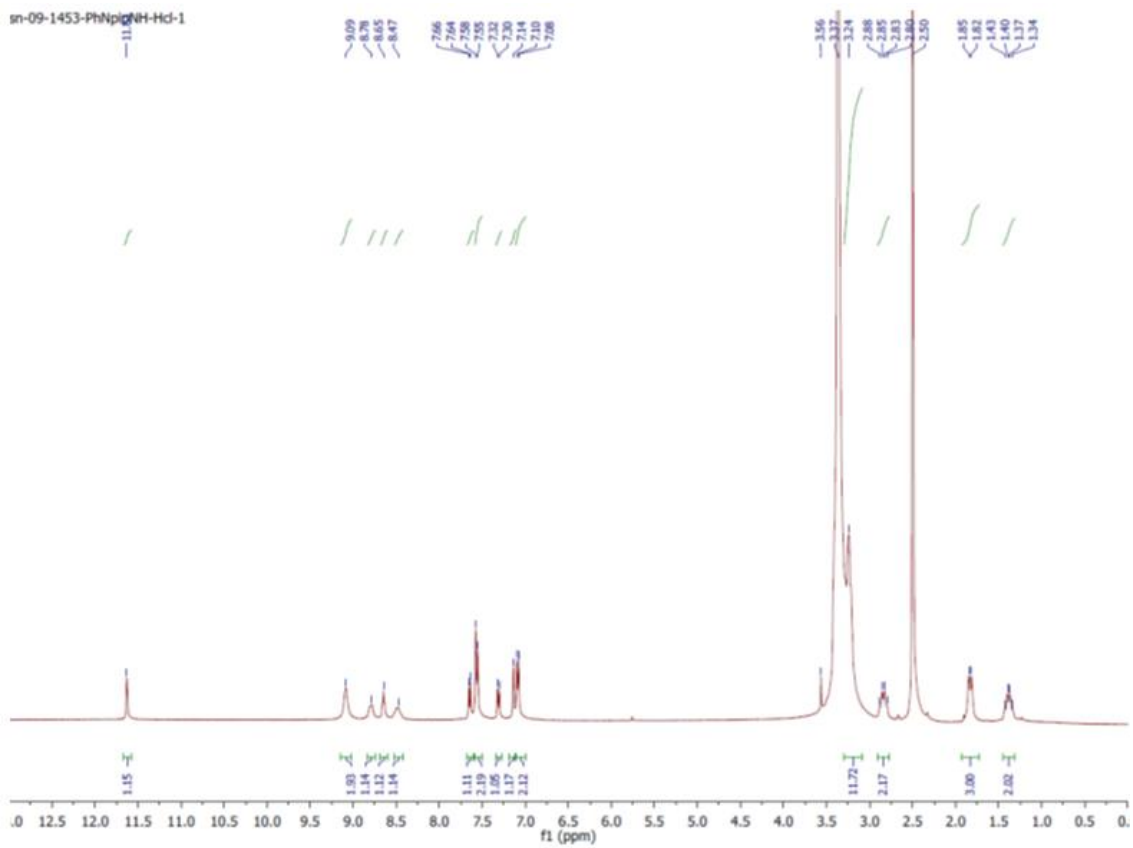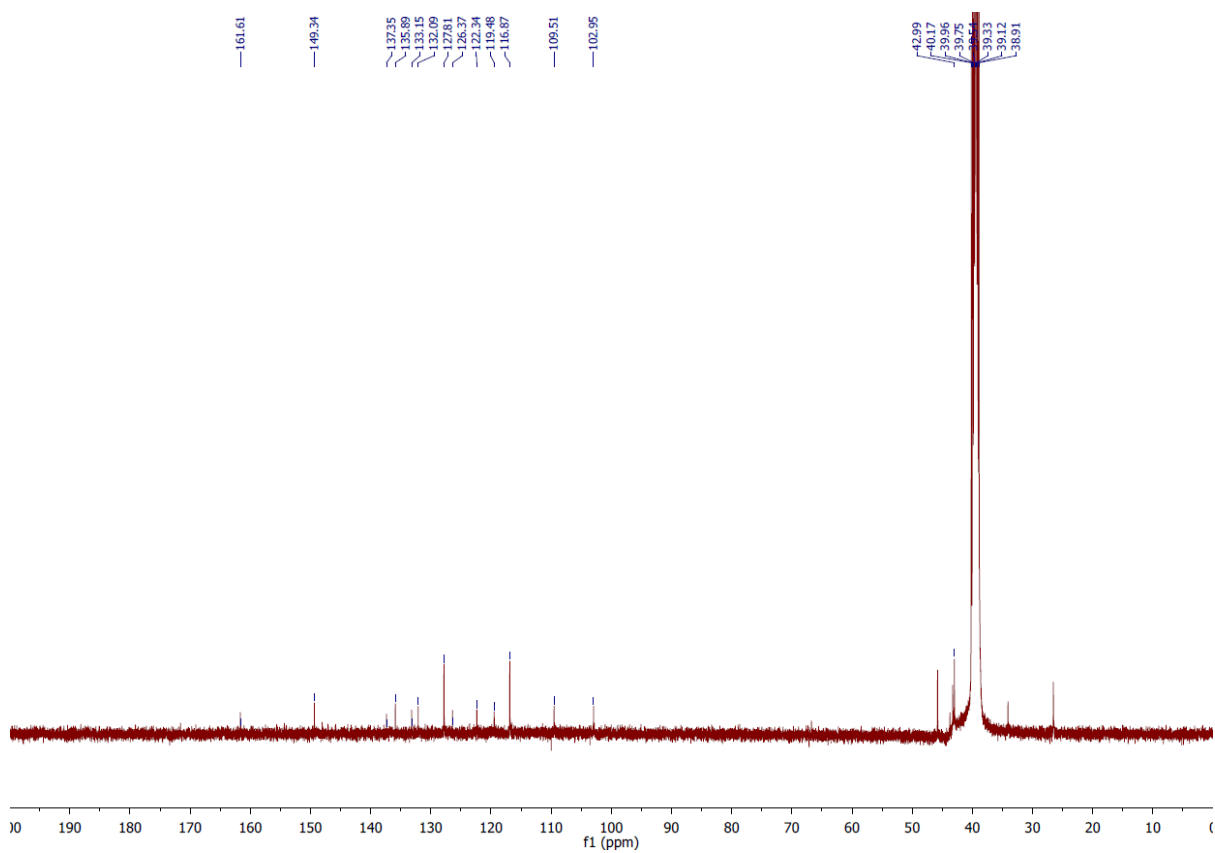

58. 6-(4-(Piperidin-1-yl)phenyl)-N-(piperidin-4-ylmethyl)-1H-indole-2-carboxamide

Hydrochloride (58).

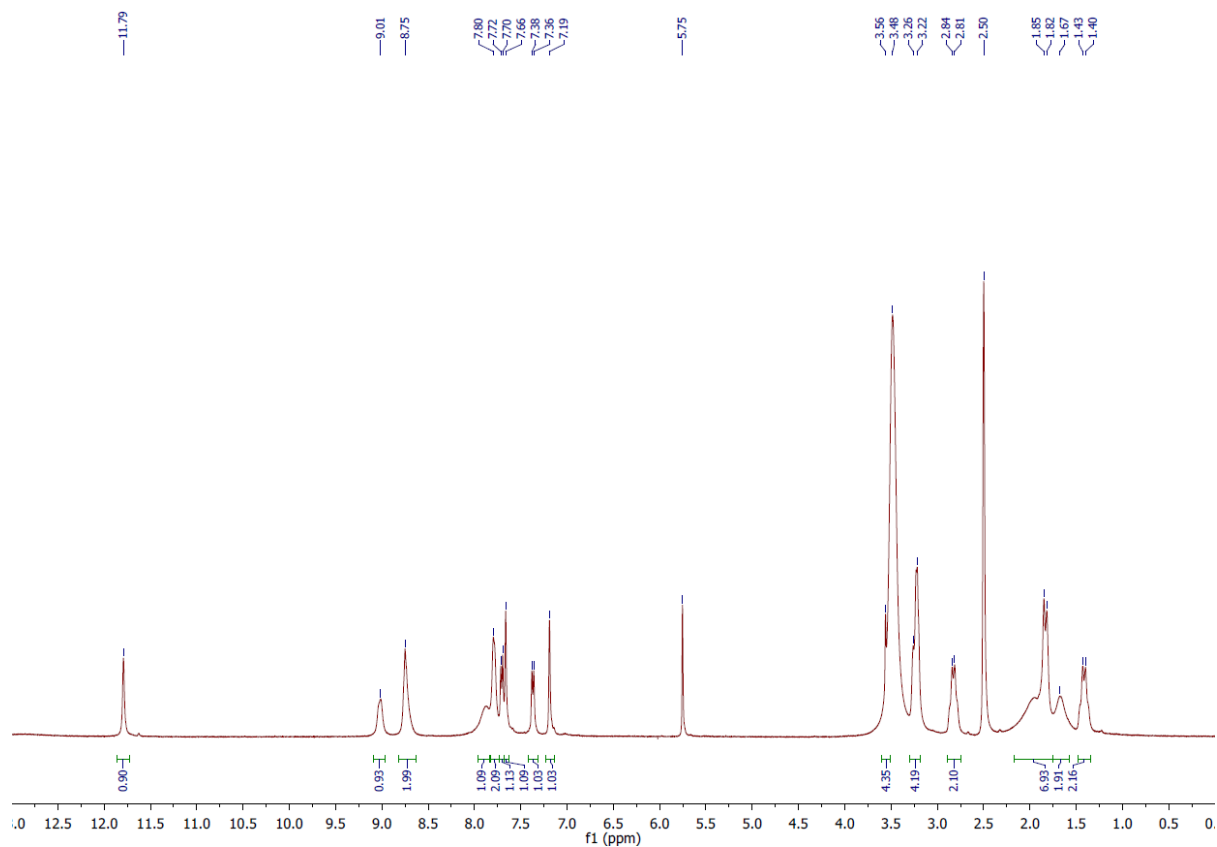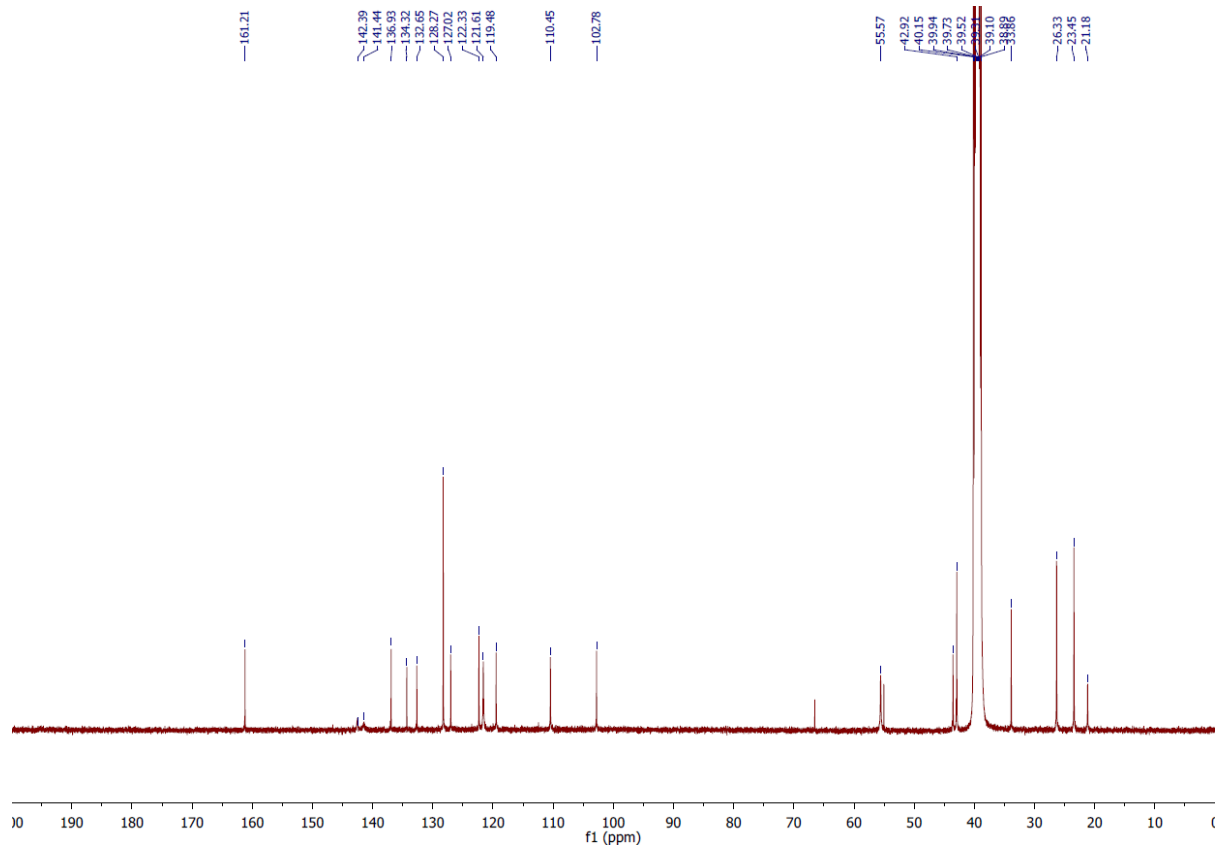

59. N-(Piperidin-4-yl)-6-(pyridin-4-yl)-1H-indole-2-carboxamide Hydrochloride (59)

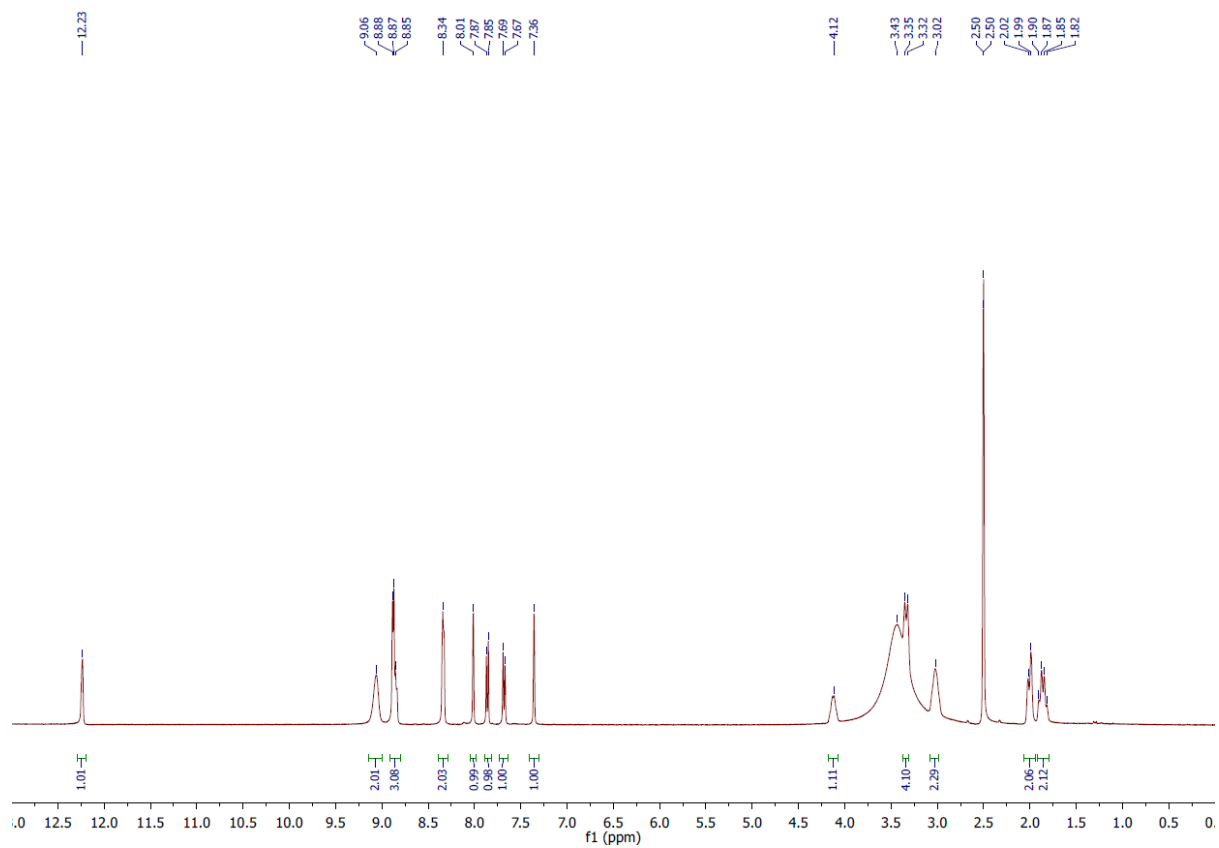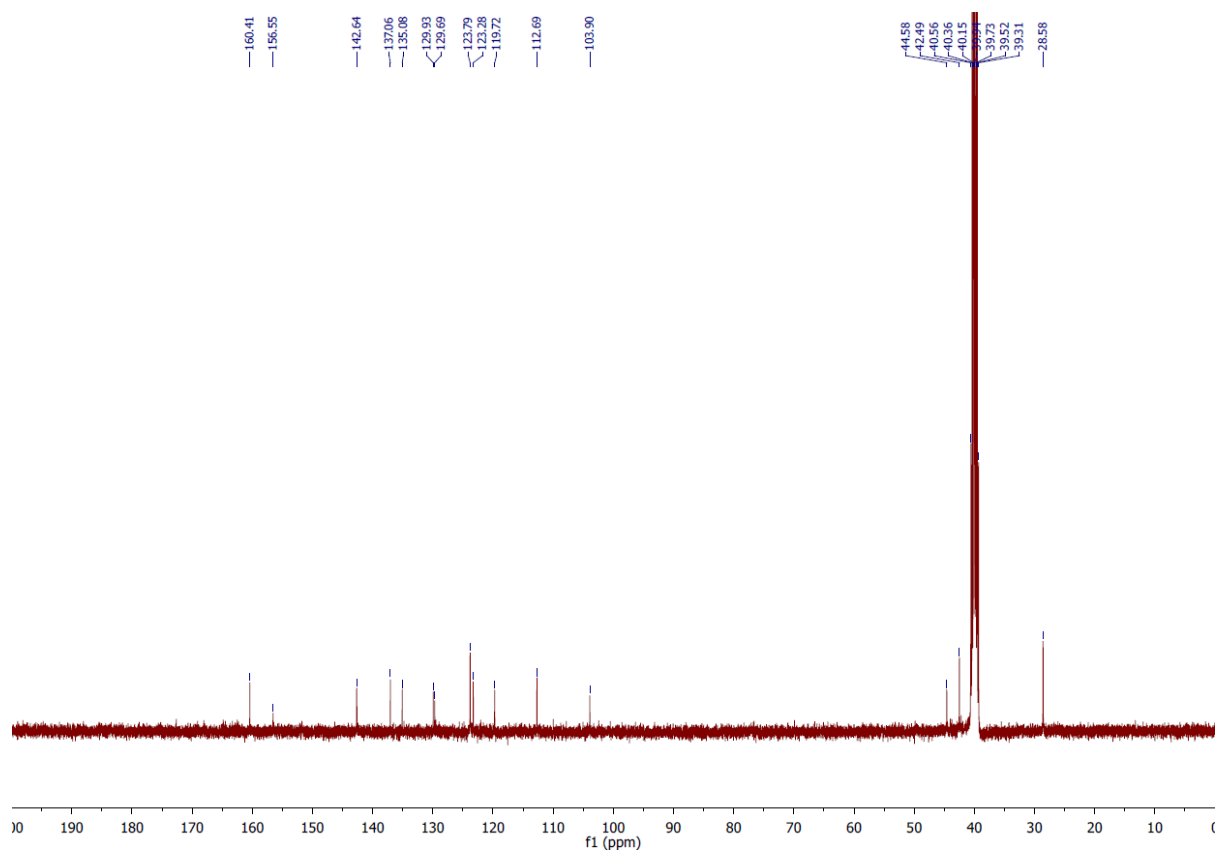

60. N-(Piperidin-4-ylmethyl)-6-(pyridin-4-yl)-1H-indole-2-carboxamide Hydrochloride (**60**).

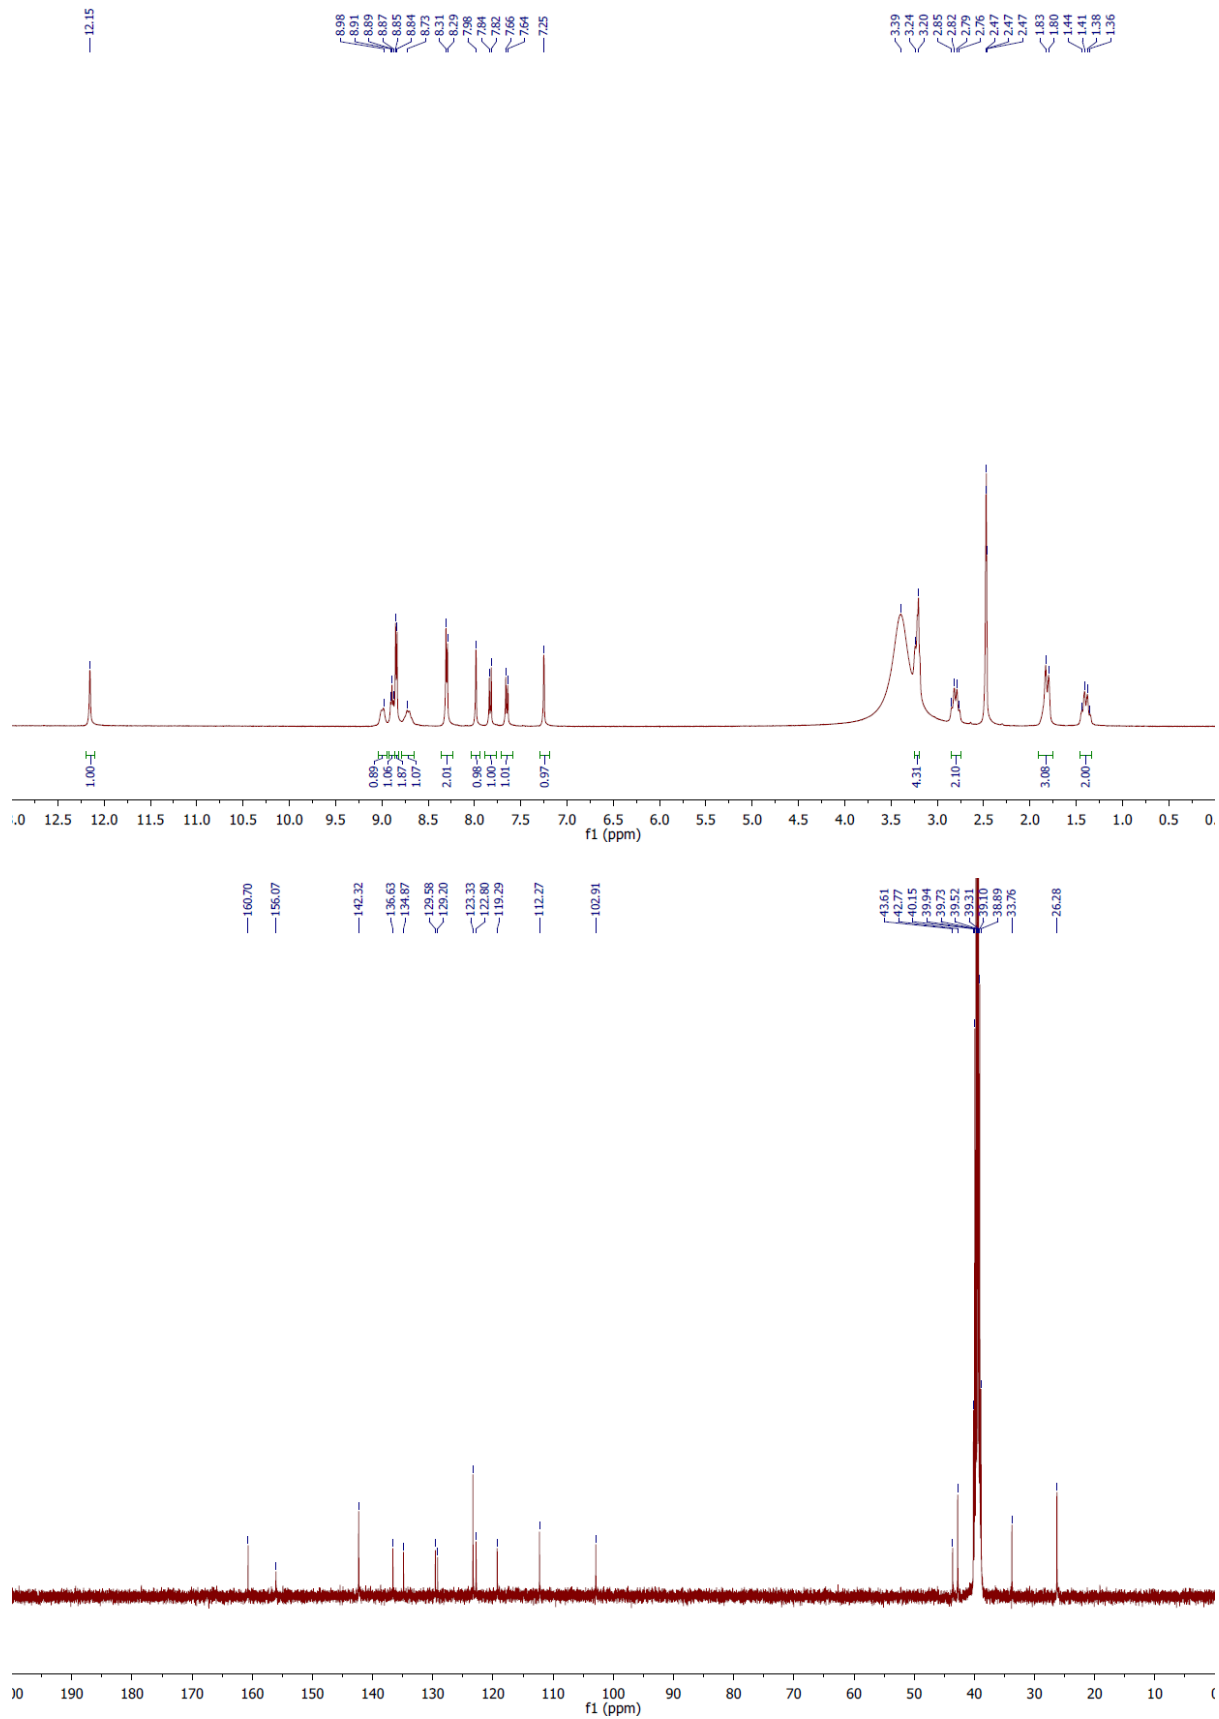

61. N-(Piperidin-4-ylmethyl)-6-(pyridin-3-yl)-1H-indole-2-carboxamide Hydrochloride (**61**).



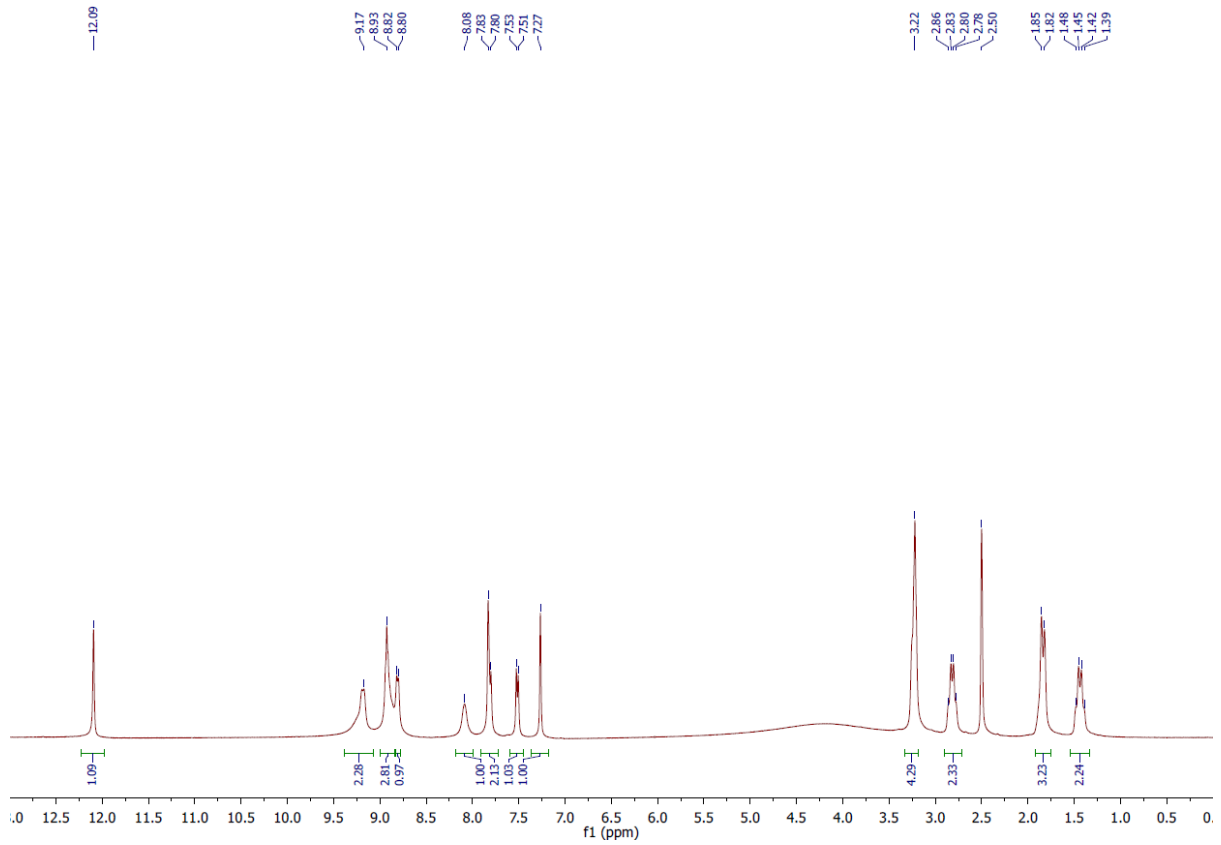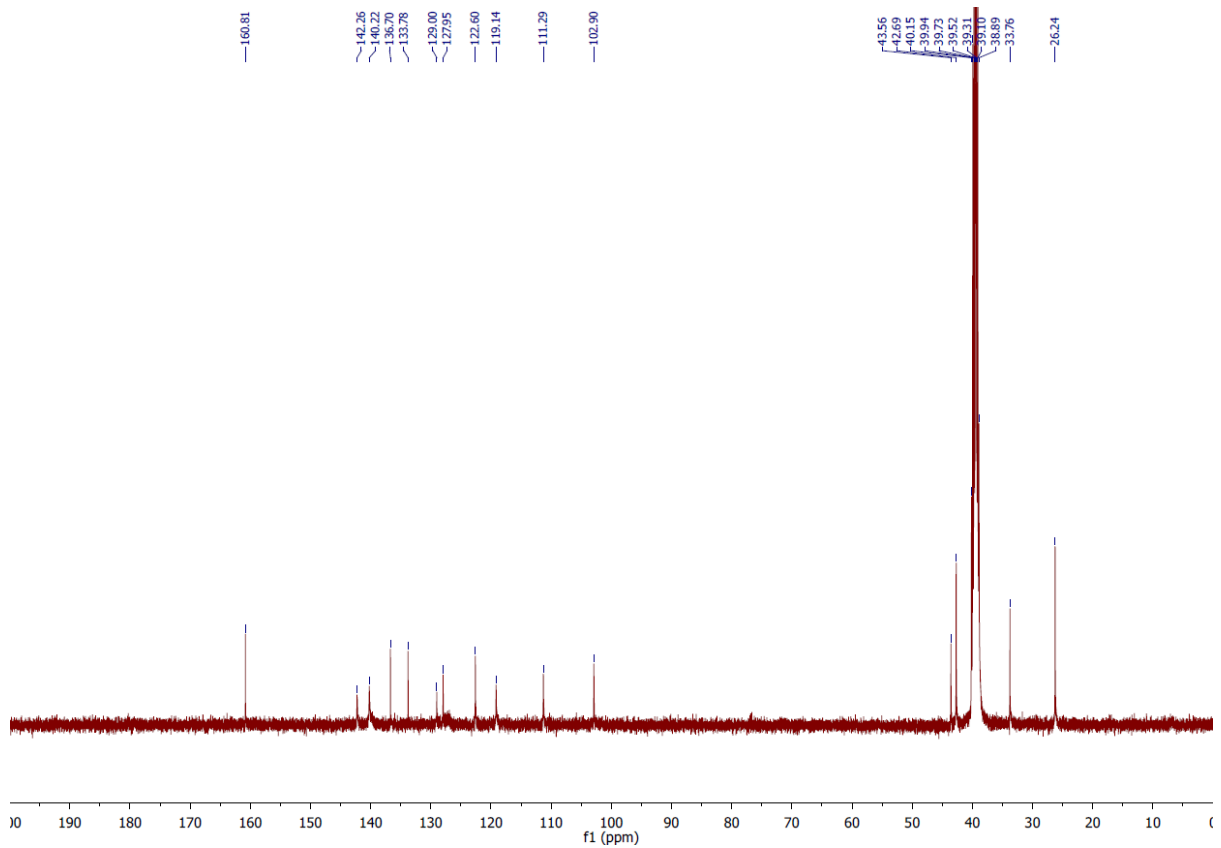

62. 6-(3,6-Dihydro-2H-pyran-4-yl)-N-(piperidin-4-ylmethyl)-1H-indole-2-carboxamide

# Hydrochloride (62).

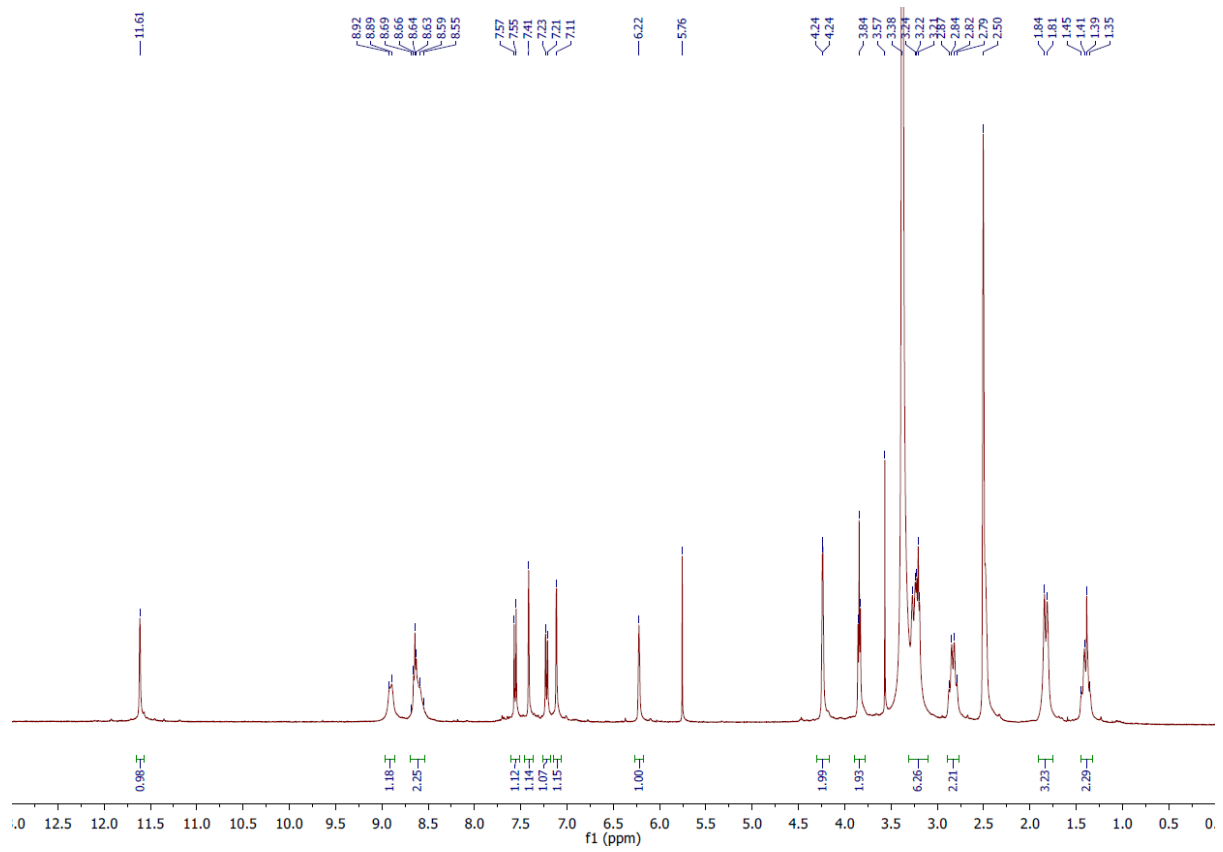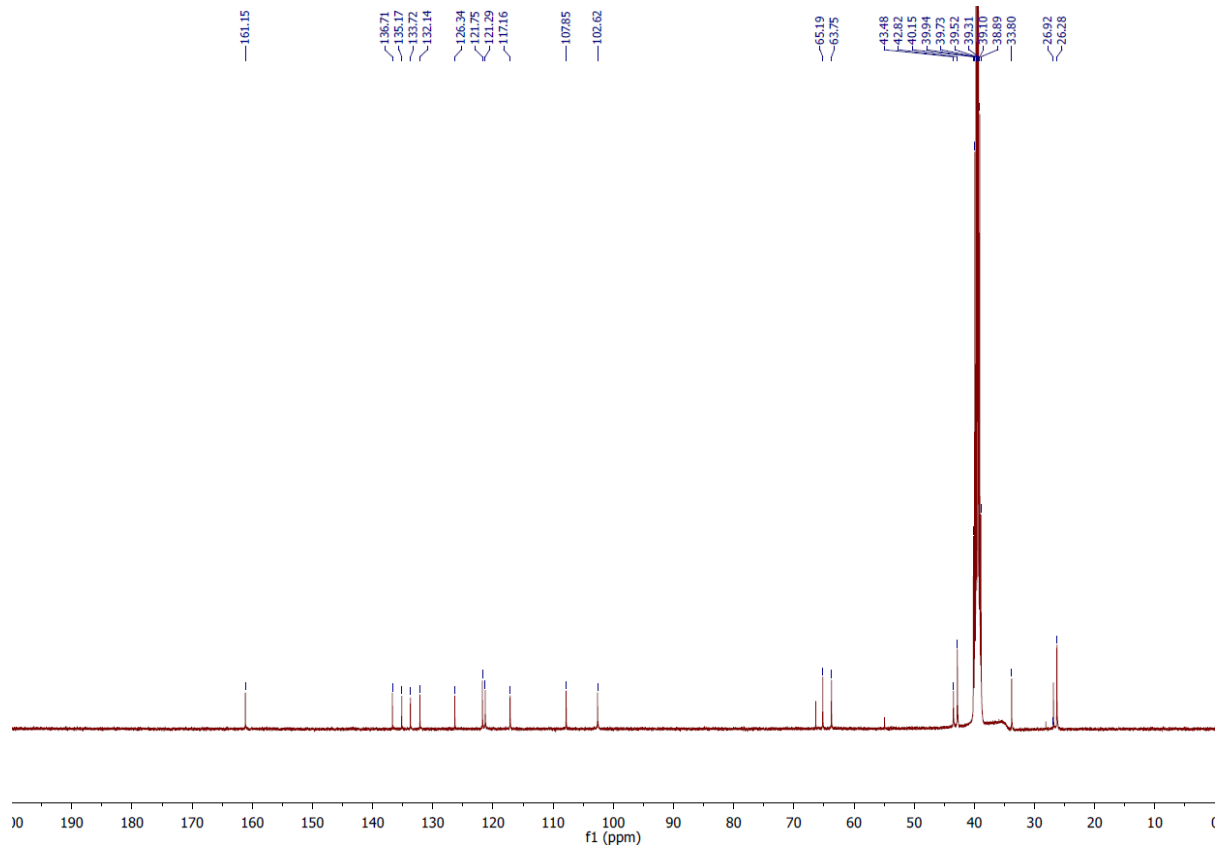

63. N-(Piperidin-4-ylmethyl)-6-(1,2,3,6-tetrahydropyridin-4-yl)-1H-indole-2-carboxamide Hydrochloride (**63**).

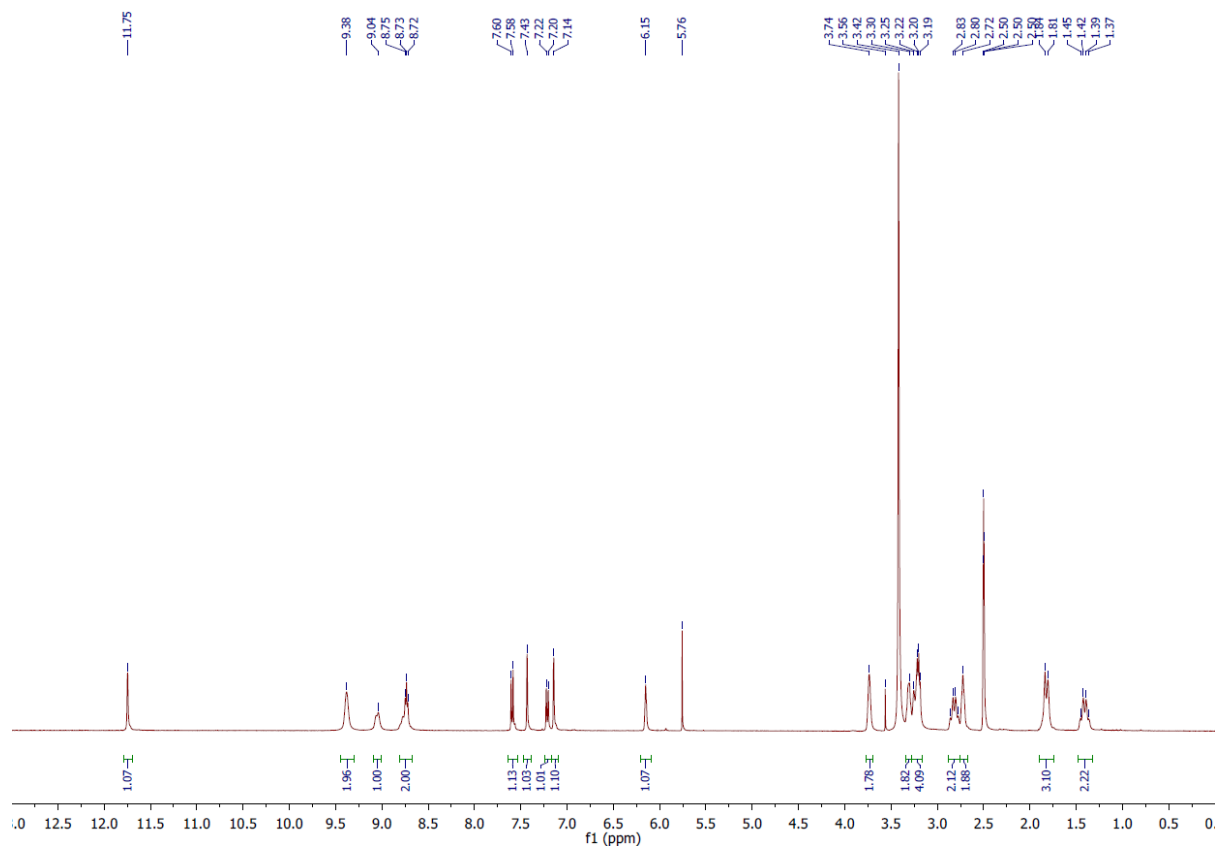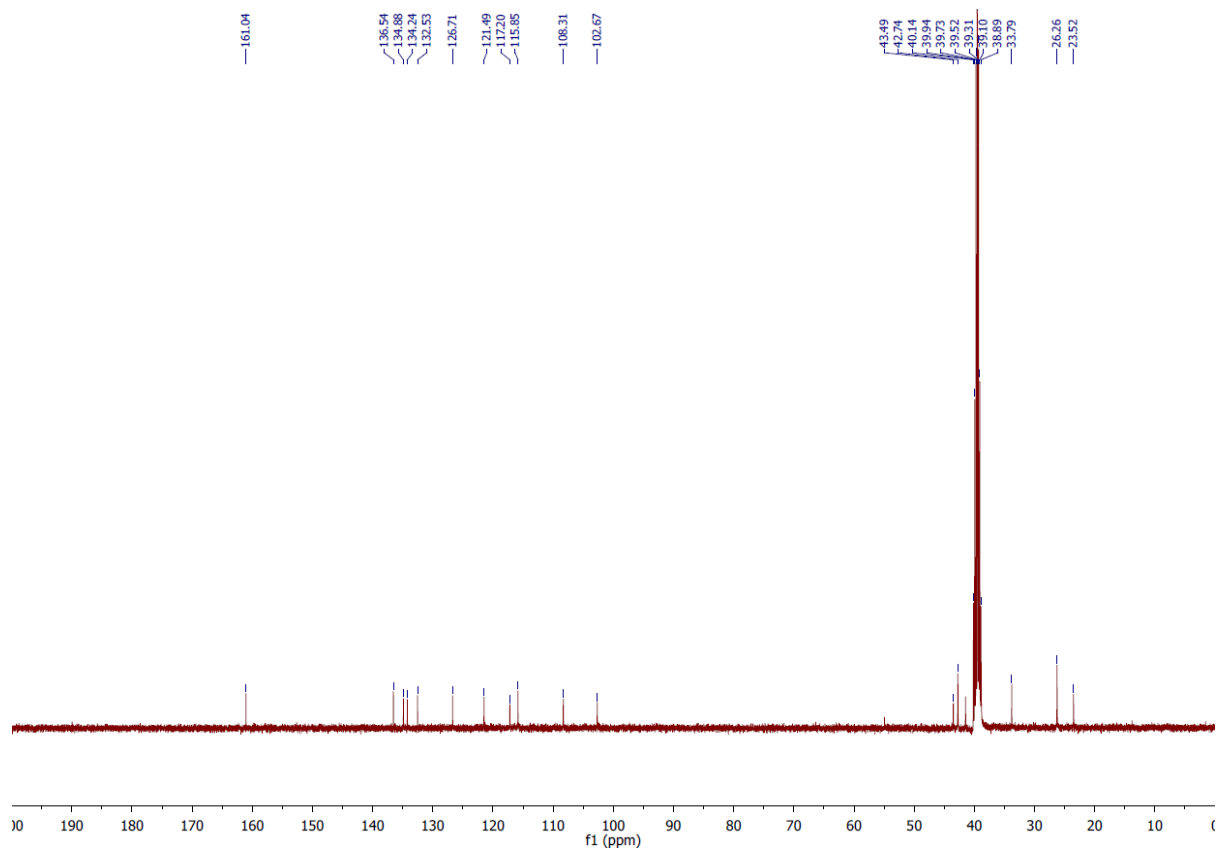

64. N-(Piperidin-4-ylmethyl)-6-(1H-pyrazol-4-yl)-1H-indole-2-carboxamide Hydrochloride (64).

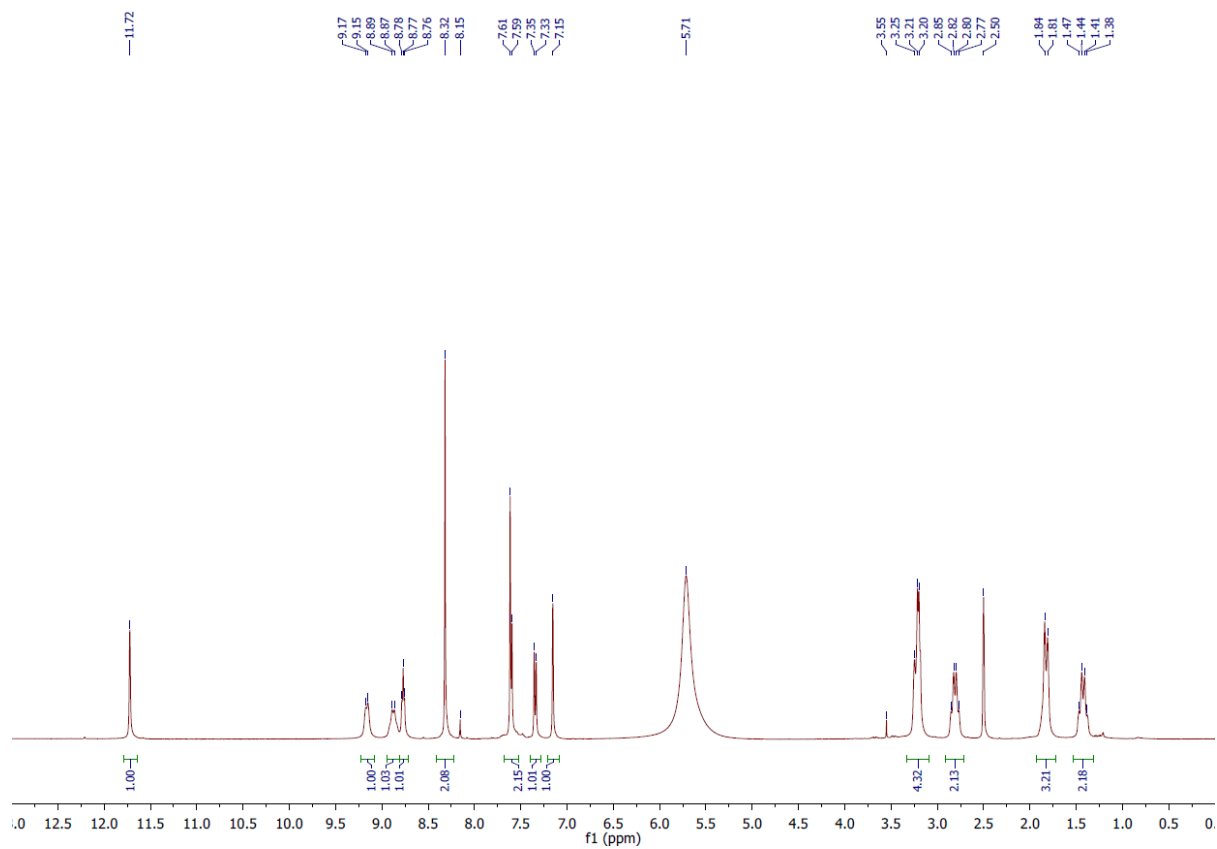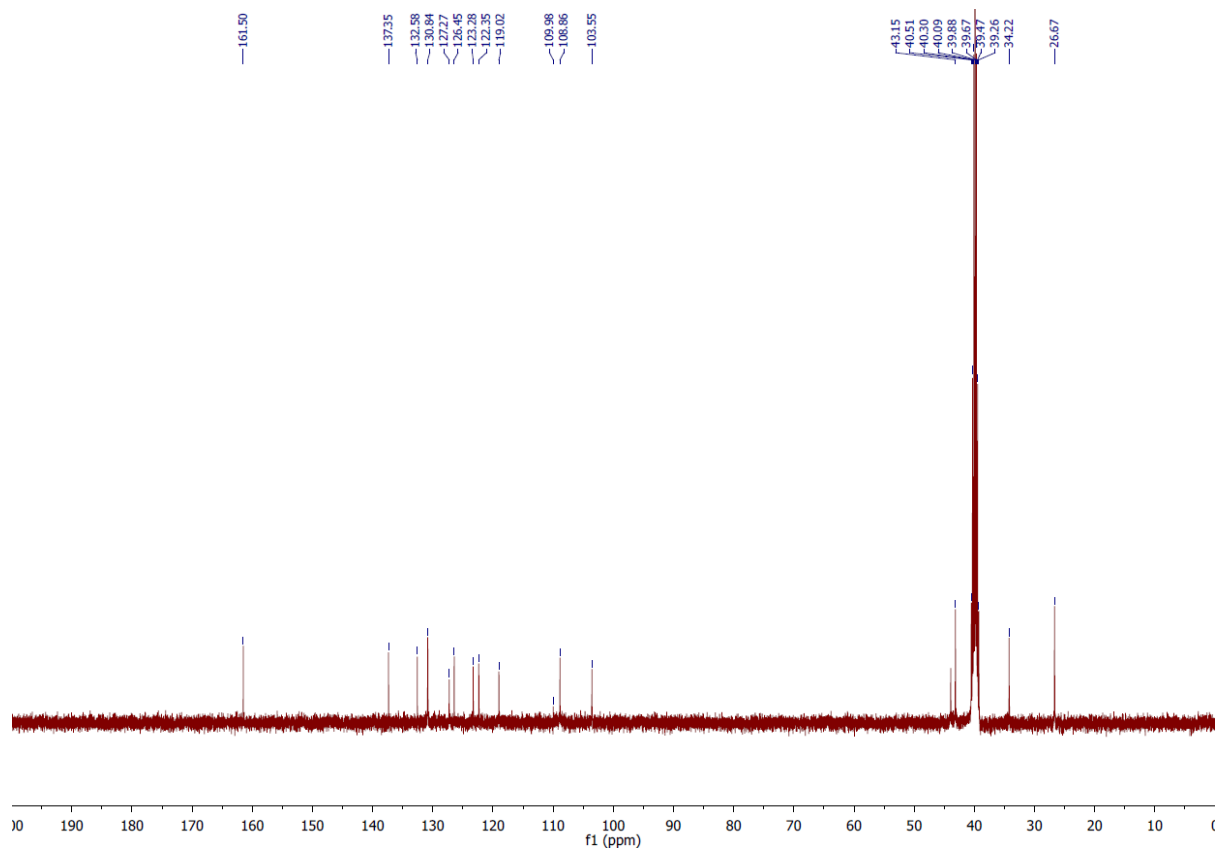

65. N-(Piperidin-4-ylmethyl)-6-(thiophen-3-yl)-1H-indole-2-carboxamide Hydrochloride (**65**).

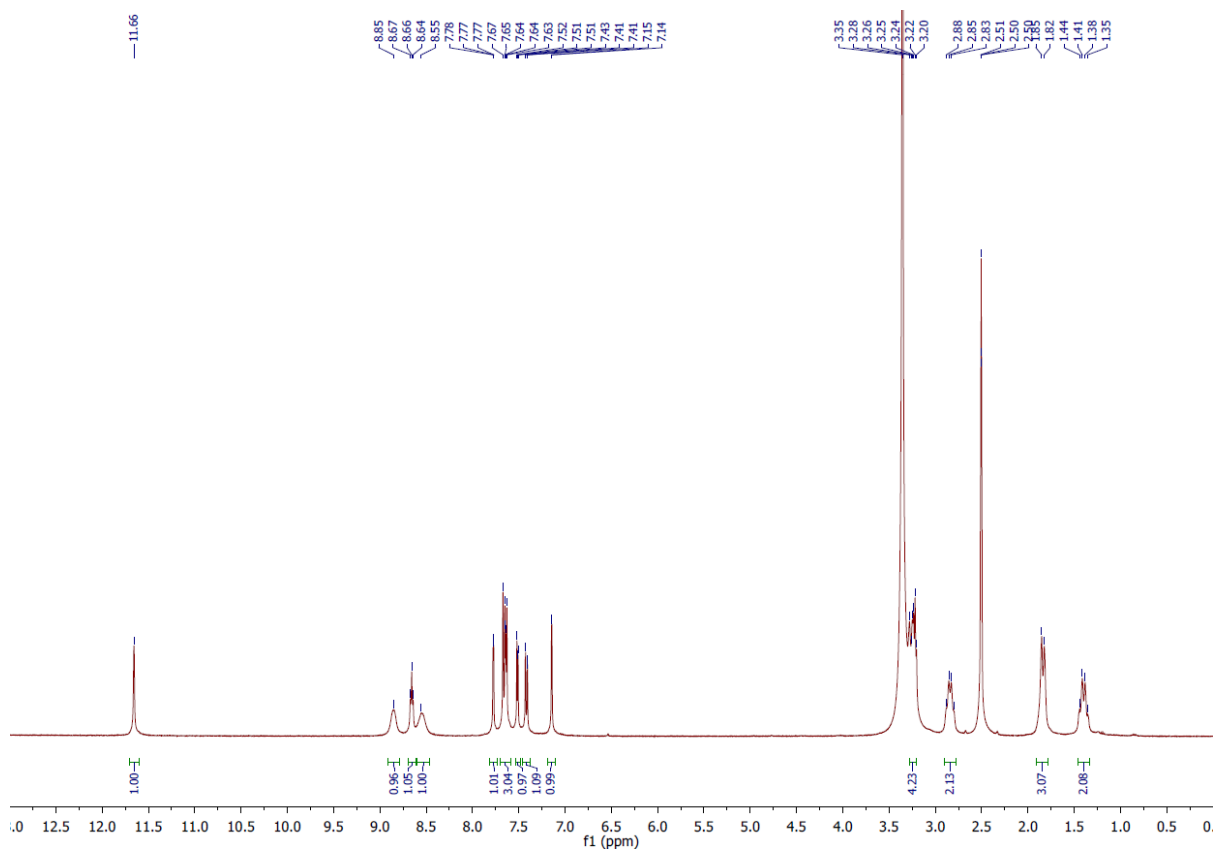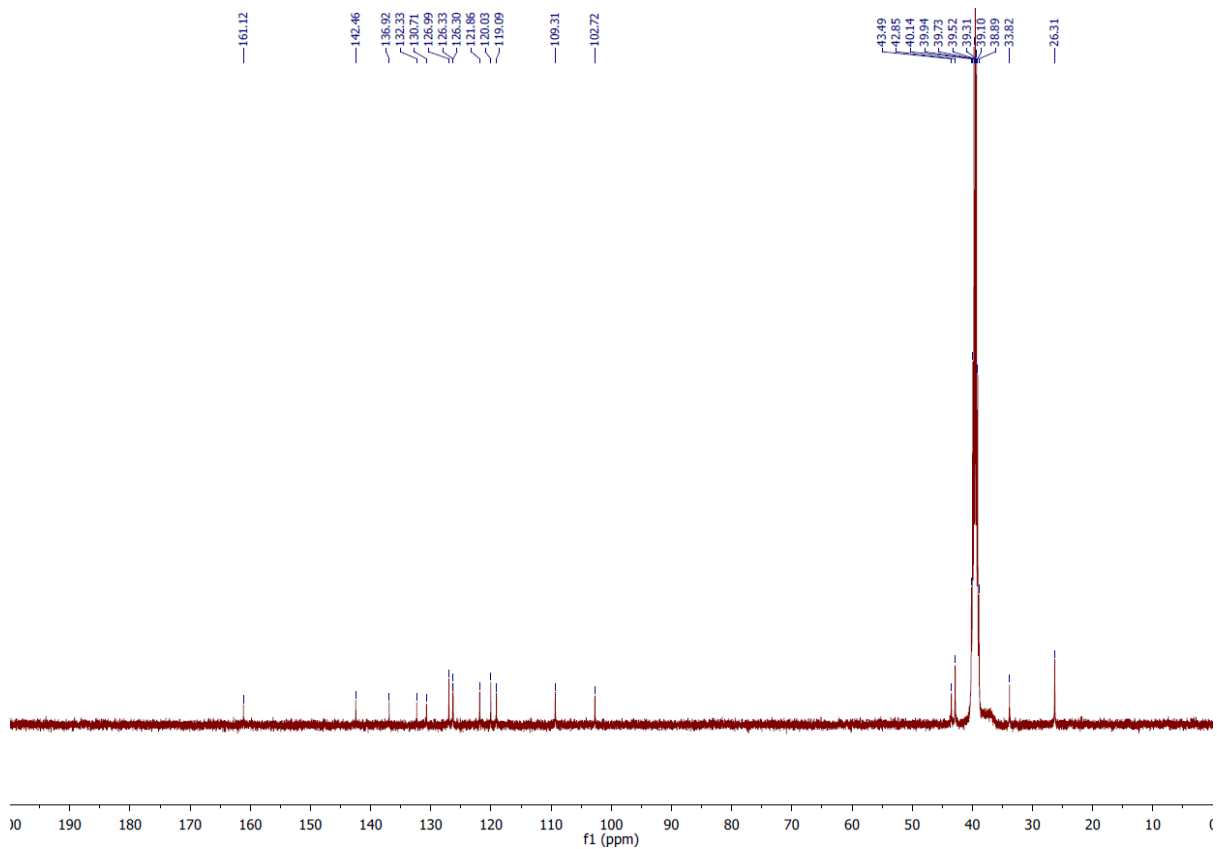

66. 6-(Furan-3-yl)-N-(piperidin-4-ylmethyl)-1H-indole-2-carboxamide Hydrochloride (**66**)

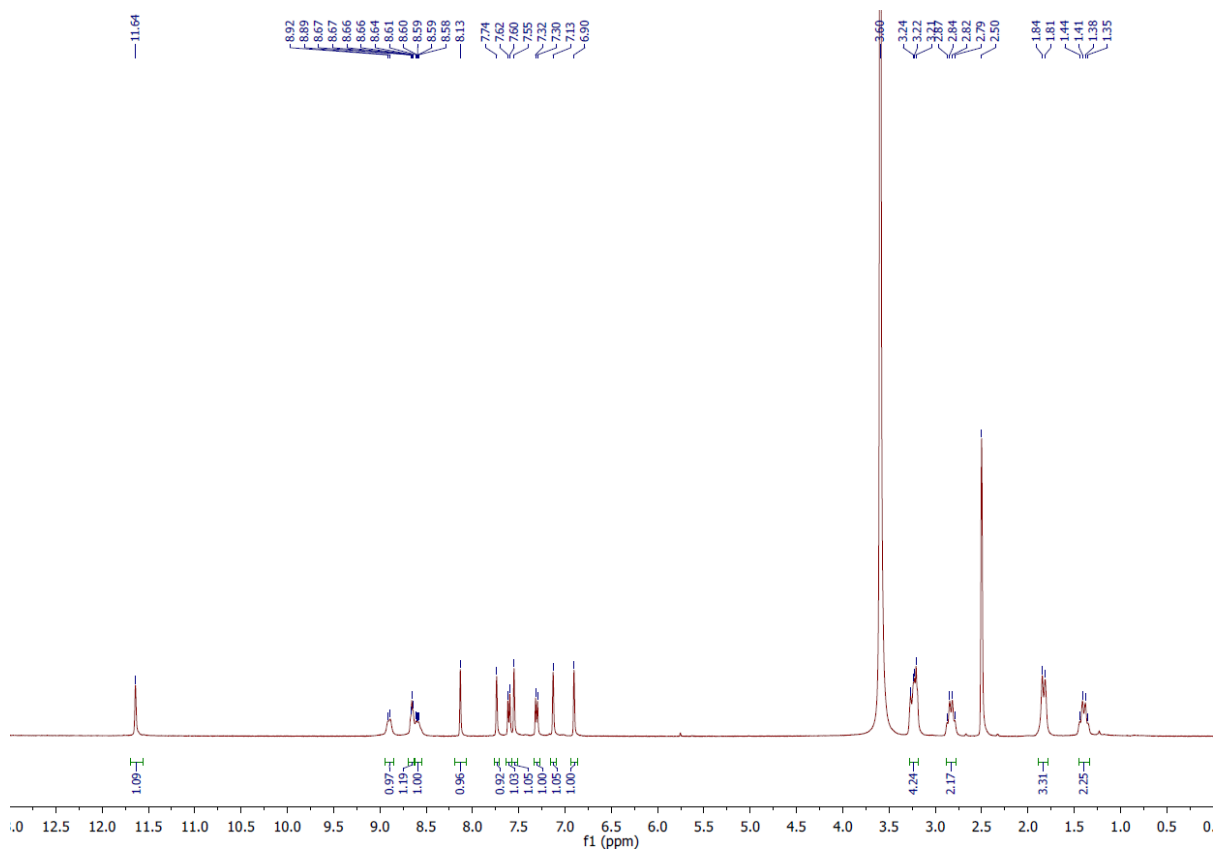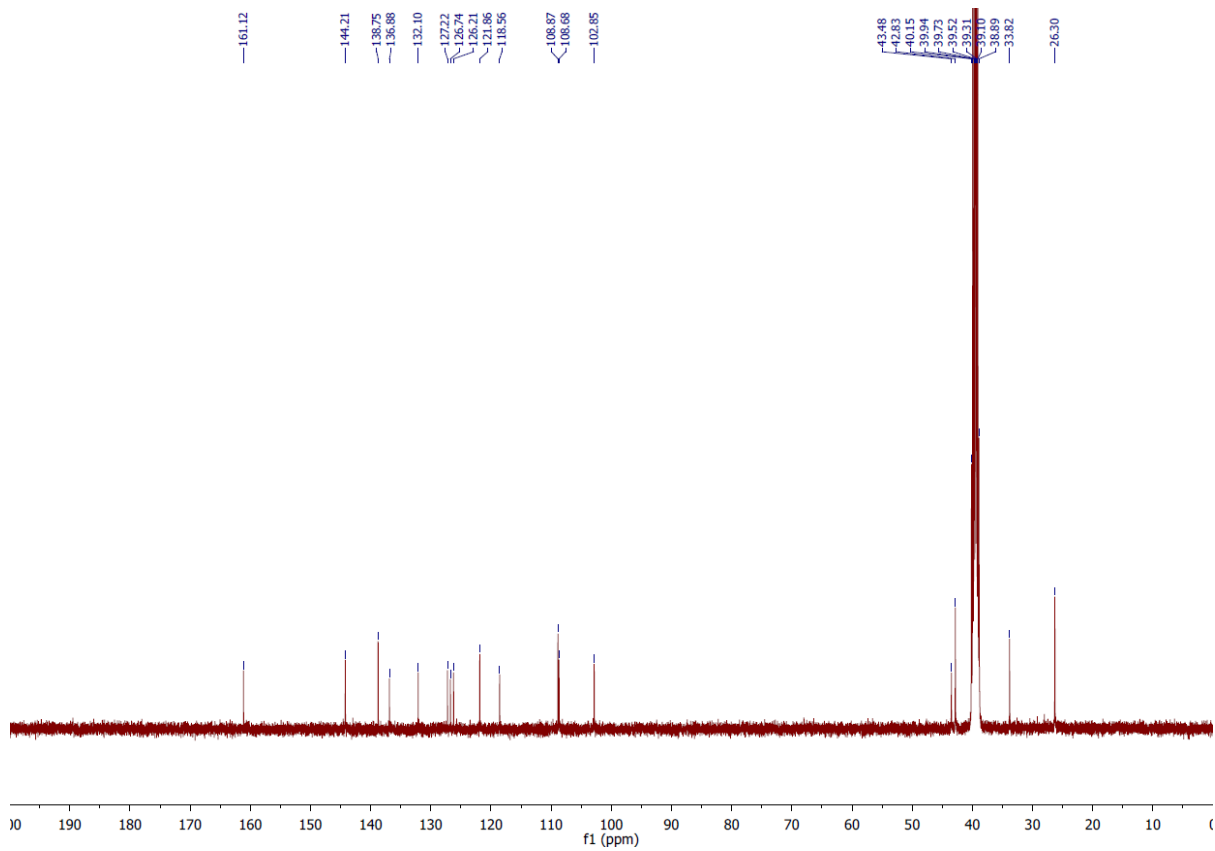

67. 5,6-Di(furan-3-yl)-N-(piperidin-4-ylmethyl)-1H-indole-3-carboxamide Hydrochloride (**67**).

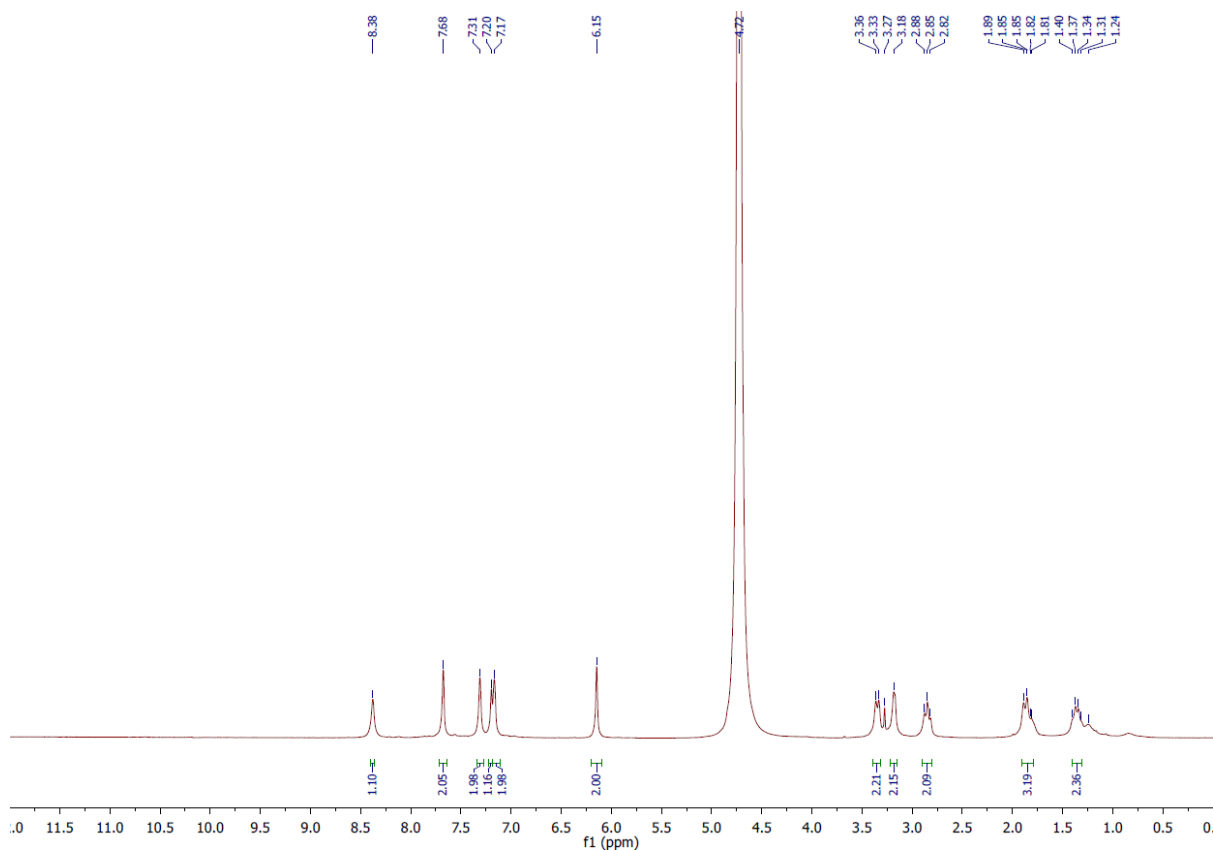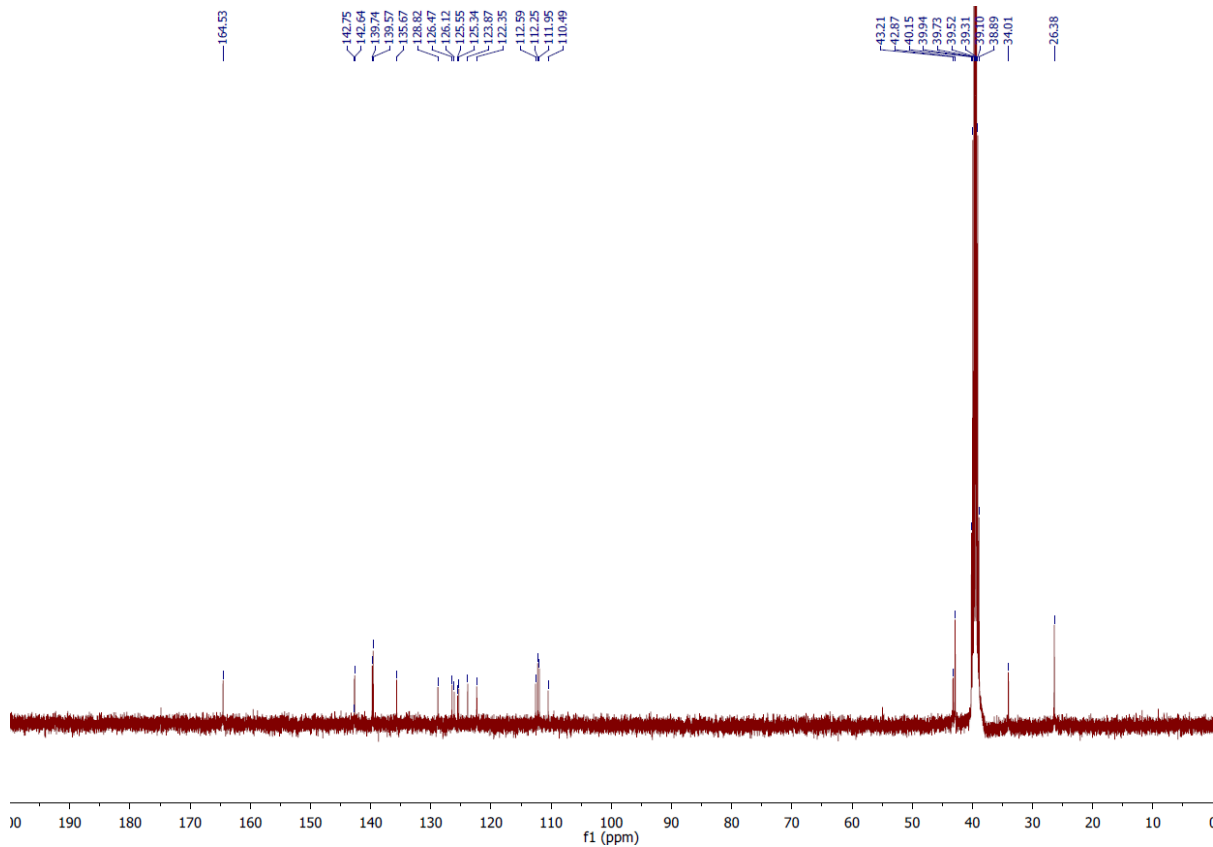

68. 6-(Furan-3-yl)-N-(piperidin-4-yl)benzofuran-3-carboxamide Hydrochloride (**68**).

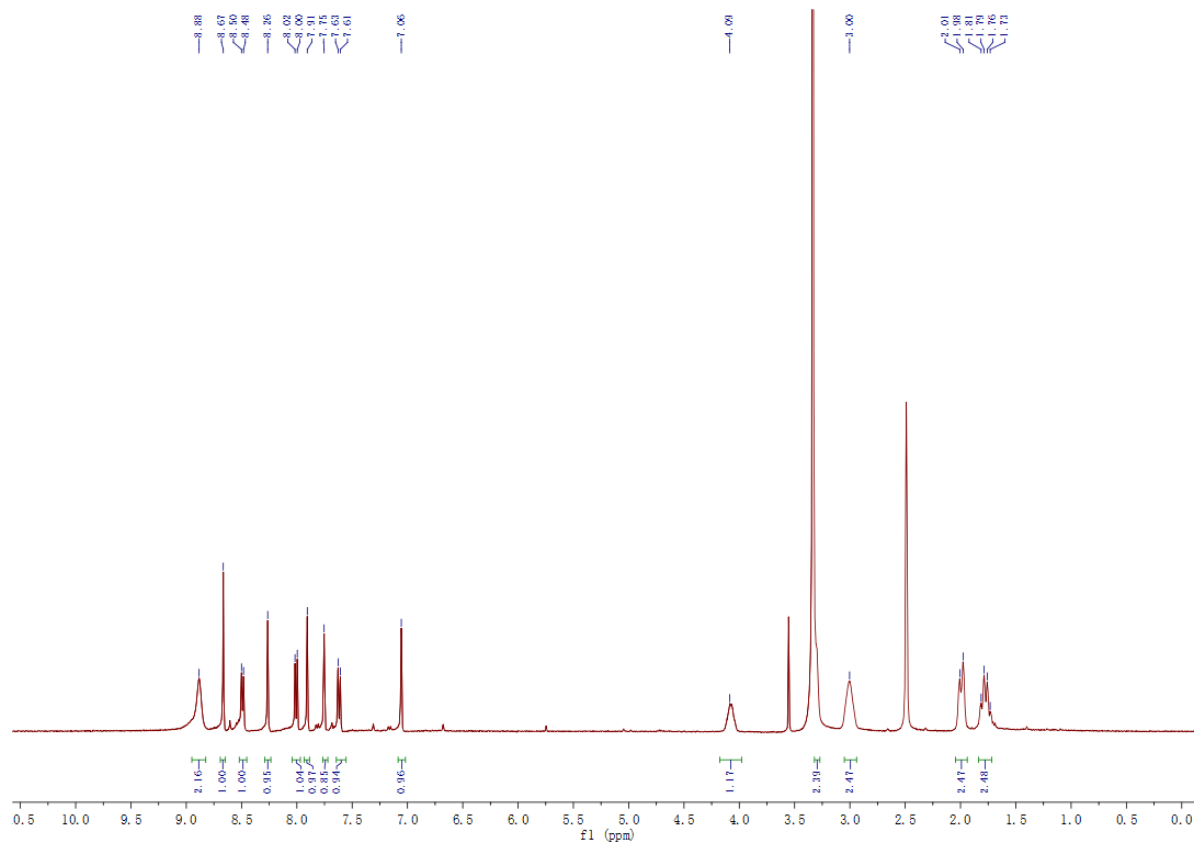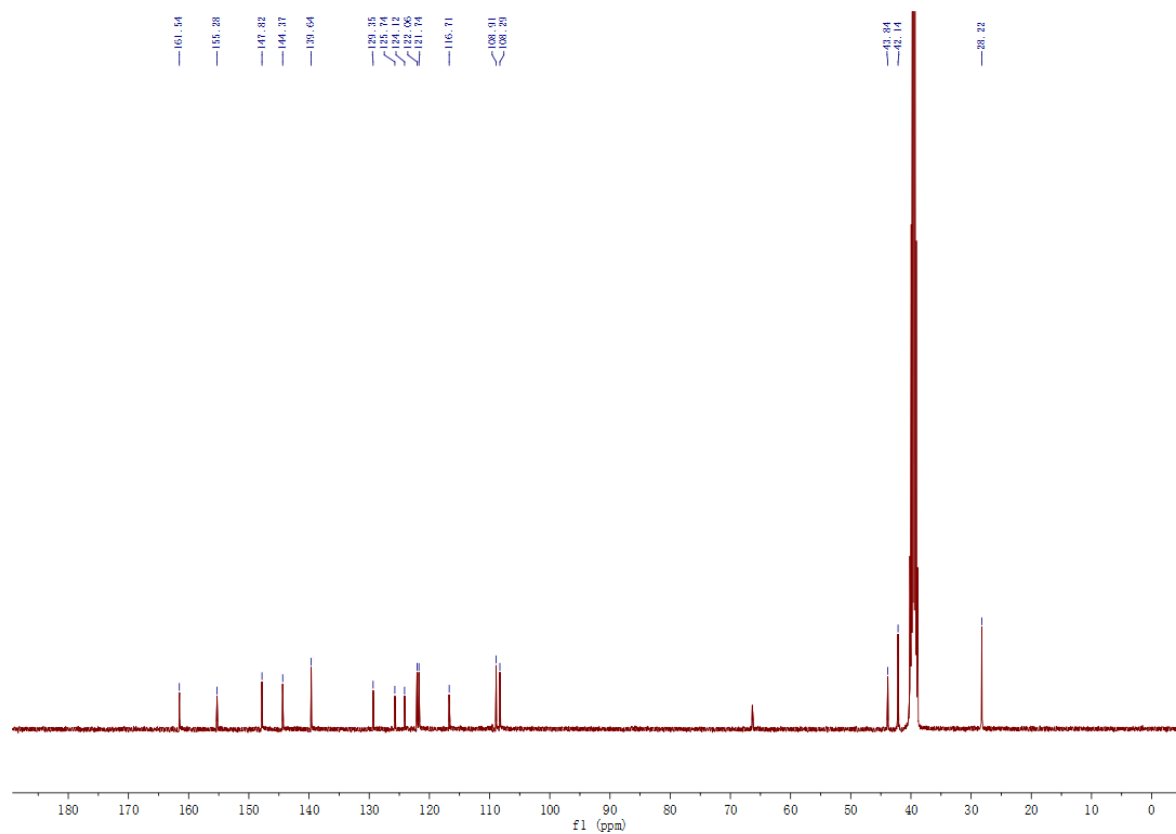



69. 6-(4-Cyanophenyl)-N-(piperidin-4-yl)benzofuran-3-carboxamide Hydrochloride (69)

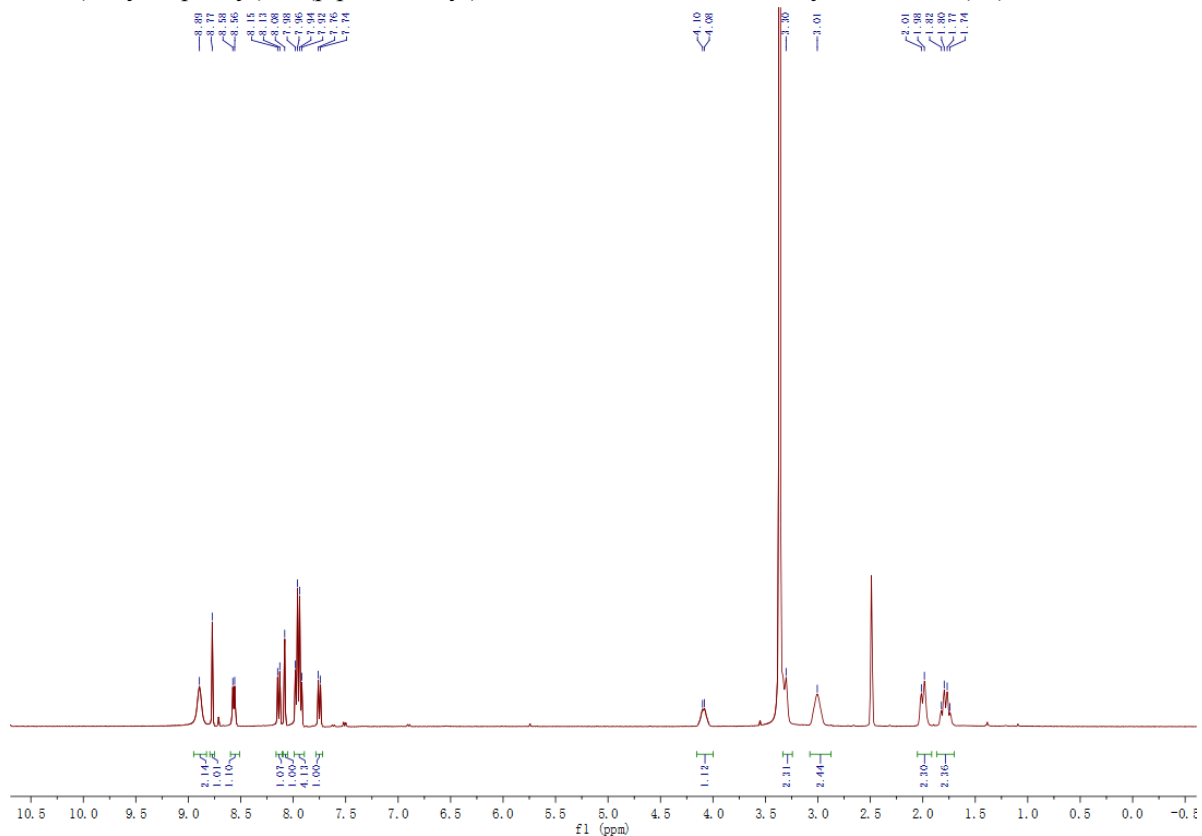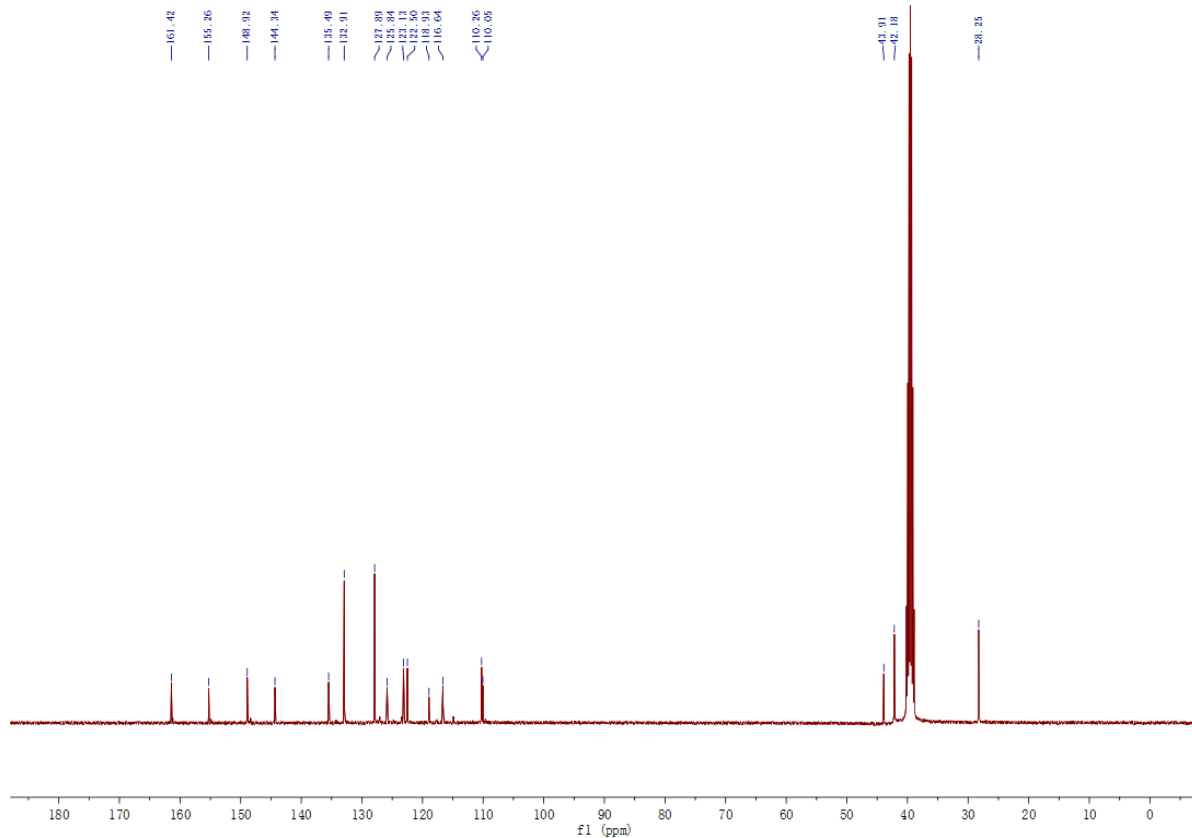

70. N-(Piperidin-4-ylmethyl)-6-(4-(trifluoromethyl)phenyl)-1H-pyrrolo[2,3-b]pyridine-3-carboxamide Hydrochloride (70).

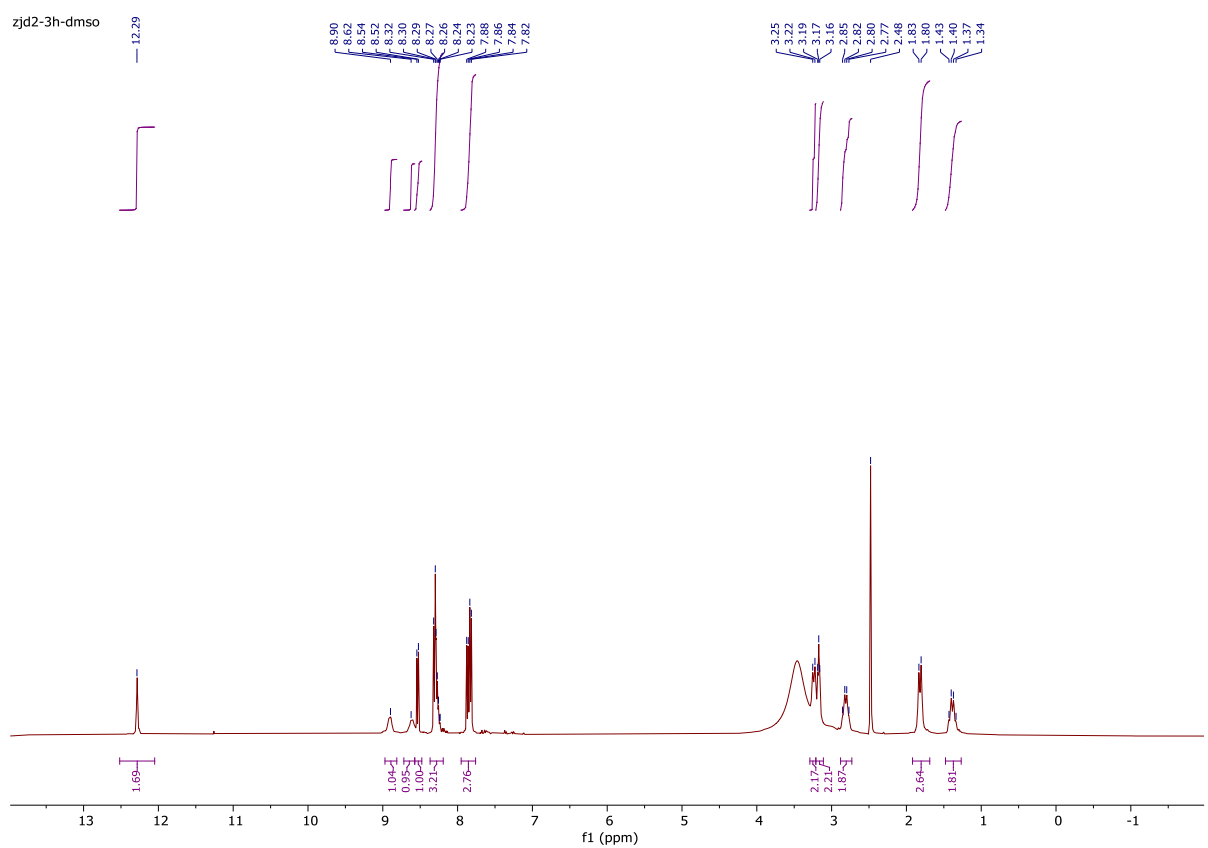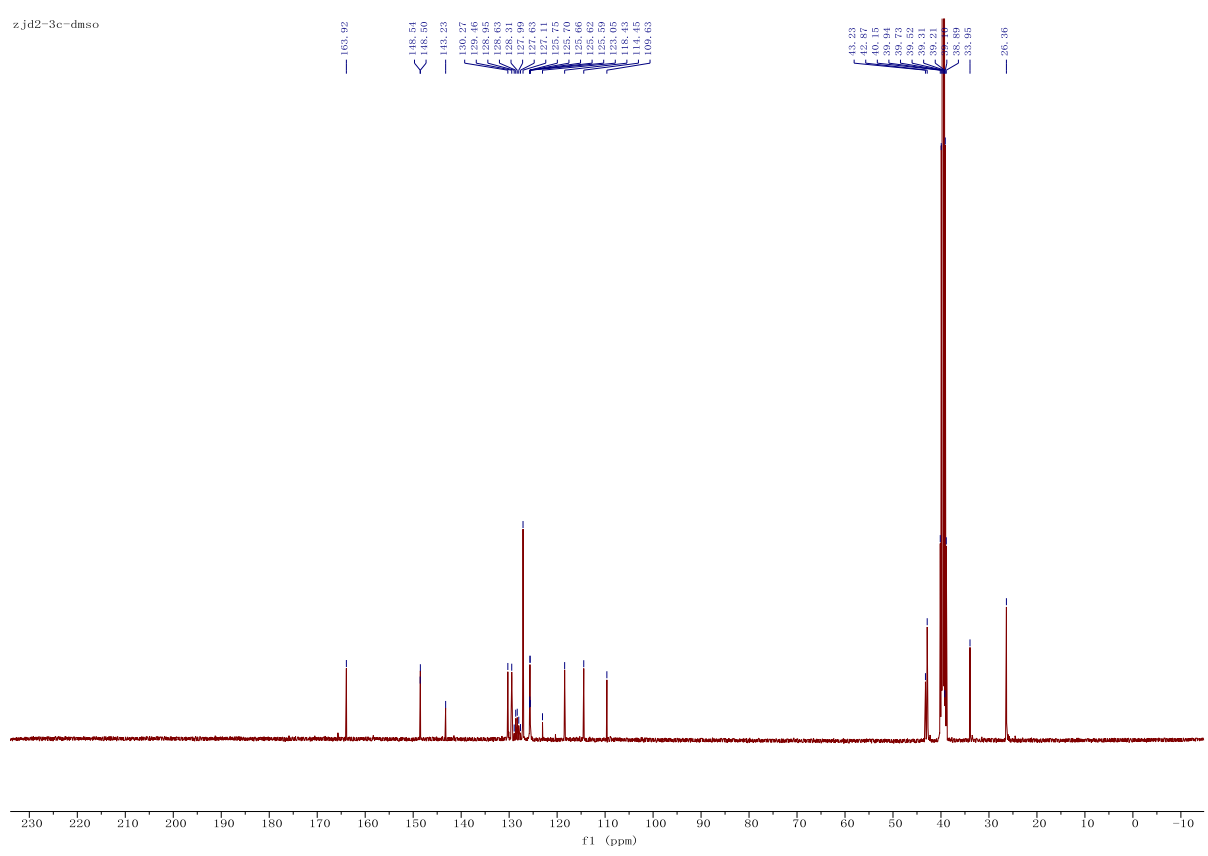

71.N-(Piperidin-4-ylmethyl)-6-(pyridin-4-yl)-1H-pyrrolo[2,3-b]pyridine-3-carboxamide Hydrochloride (71).

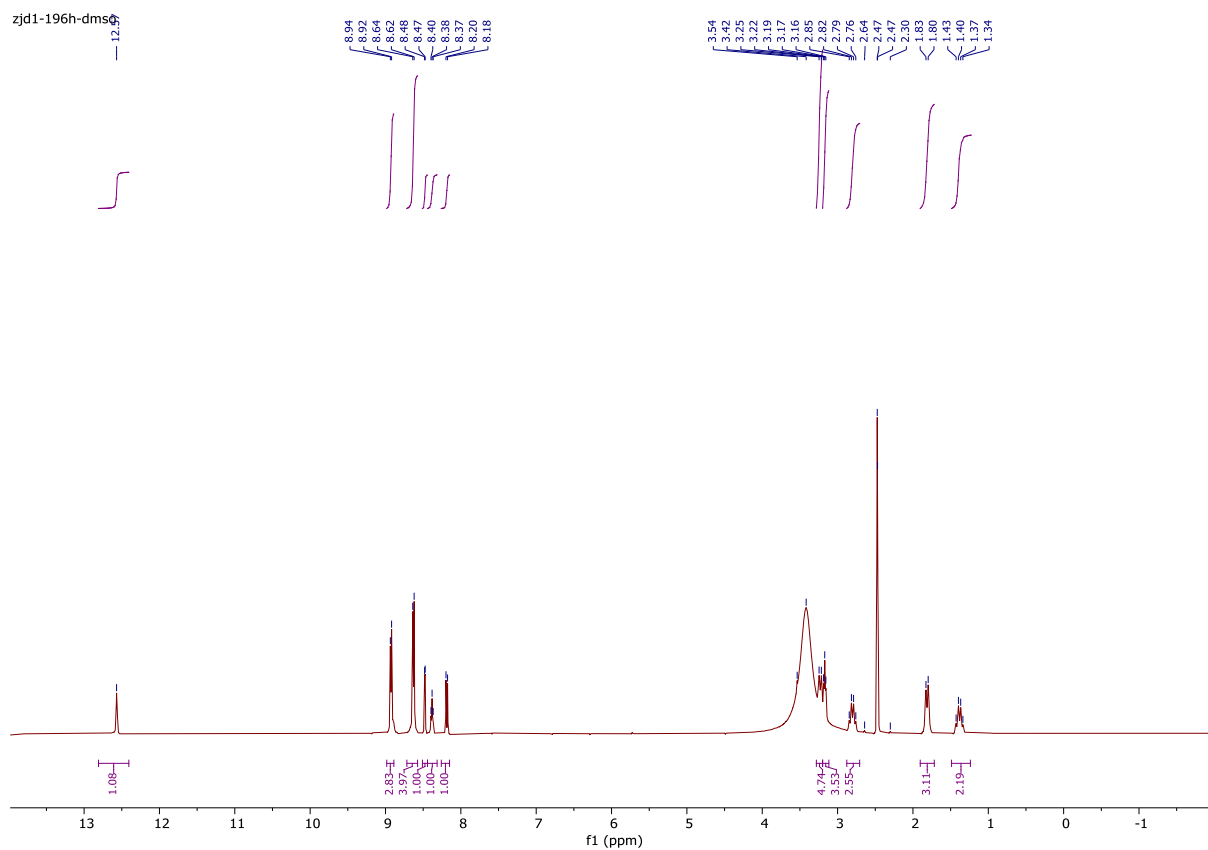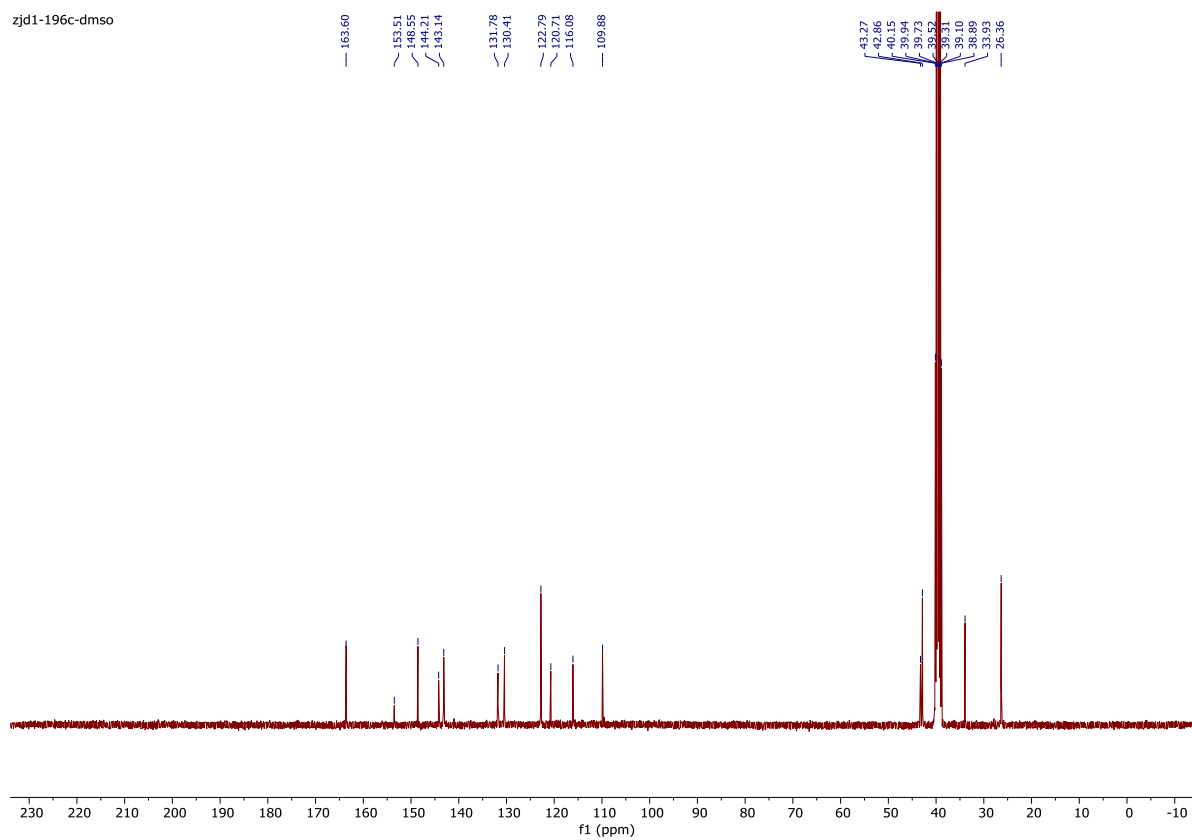

72. 6-(4-(Piperidin-1-ylmethyl)phenyl)-N-(piperidin-4-ylmethyl)-1H-pyrrolo[2,3-b]pyridine-3-carboxamide Hydrochloride (72).

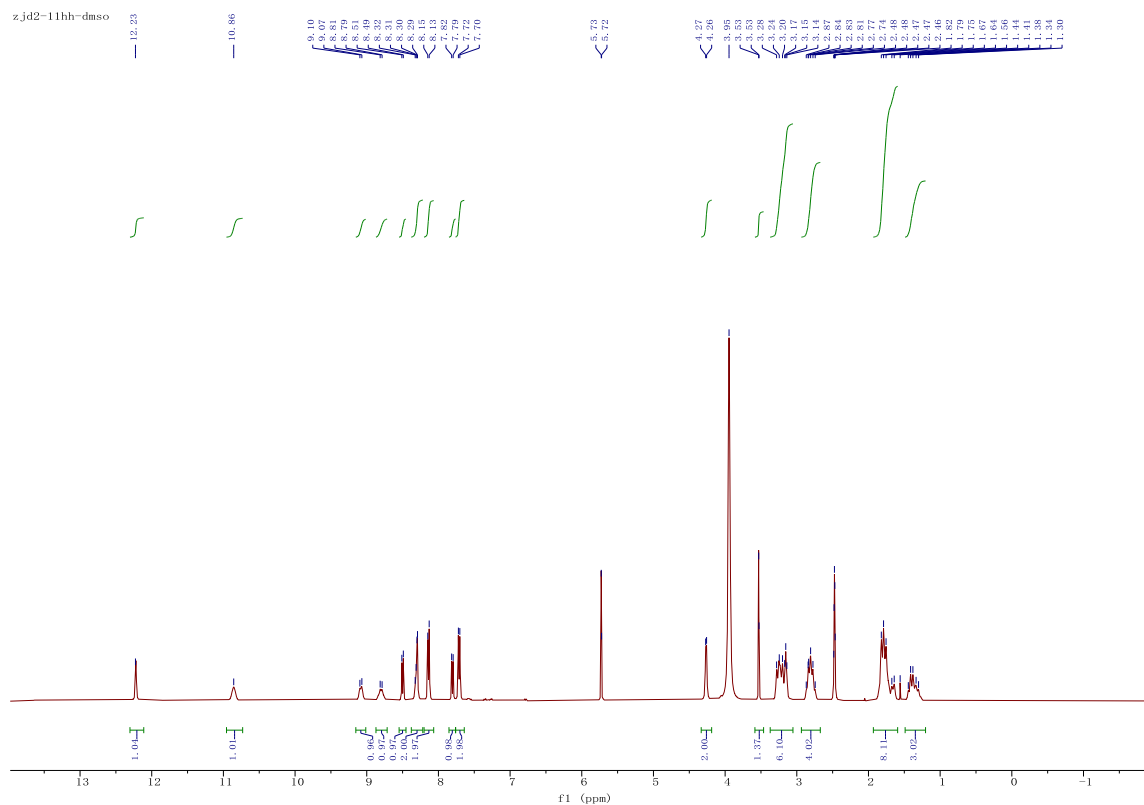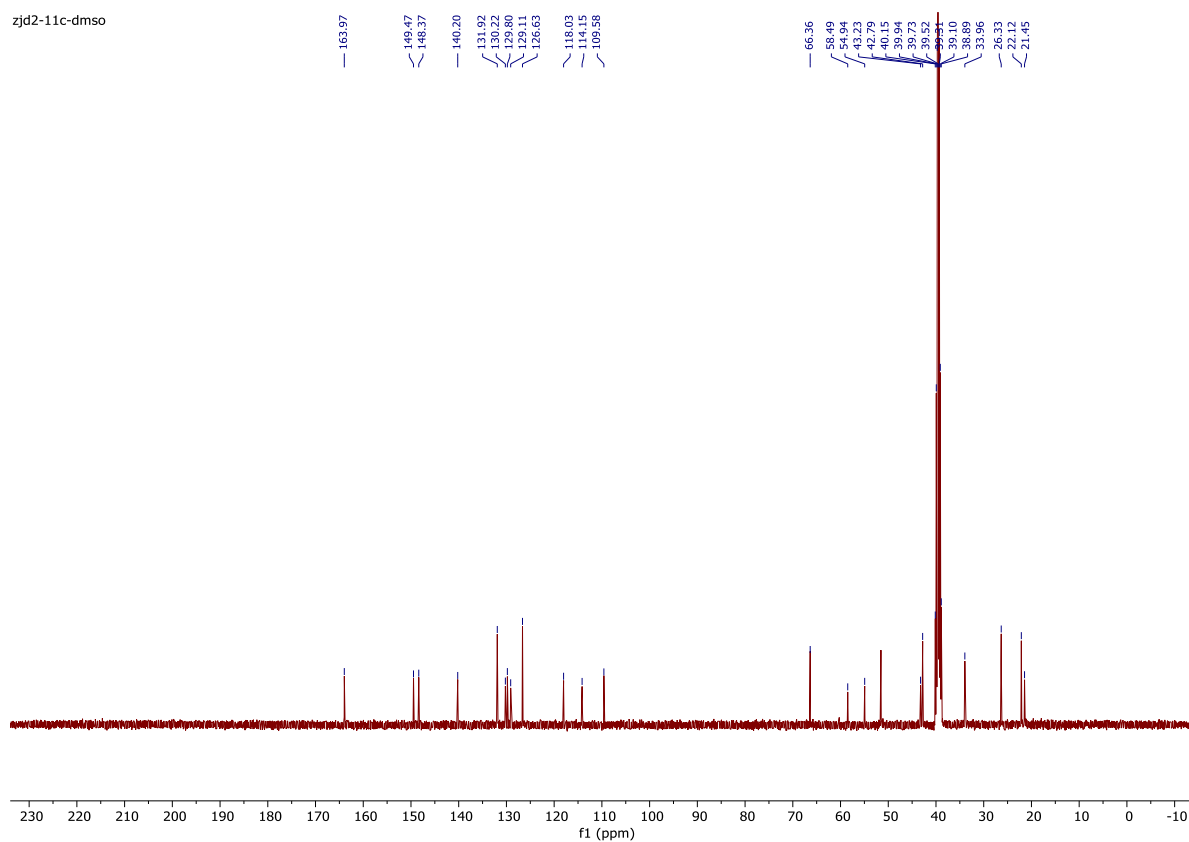

73. 6-(4-(Morpholinomethyl)phenyl)-N-(piperidin-4-ylmethyl)-1H-pyrrolo[2,3-b]pyridine-3-carboxamide Hydrochloride

(73).

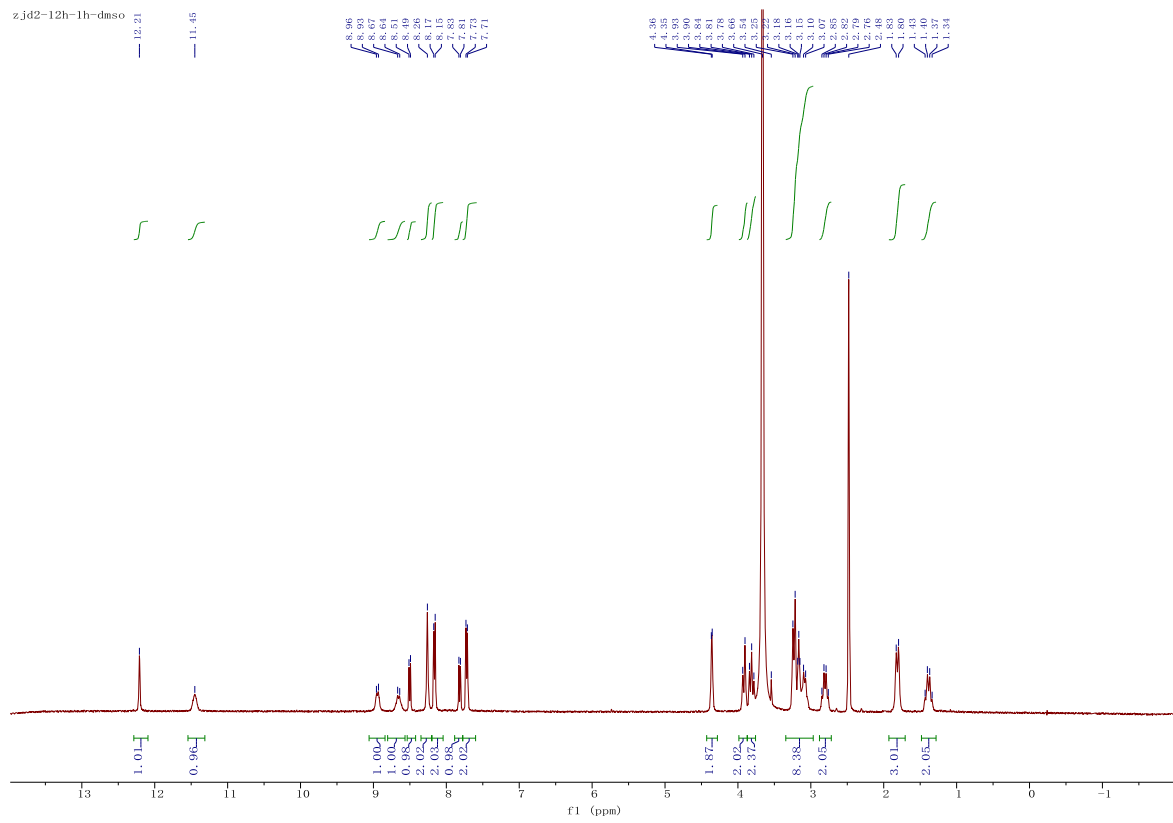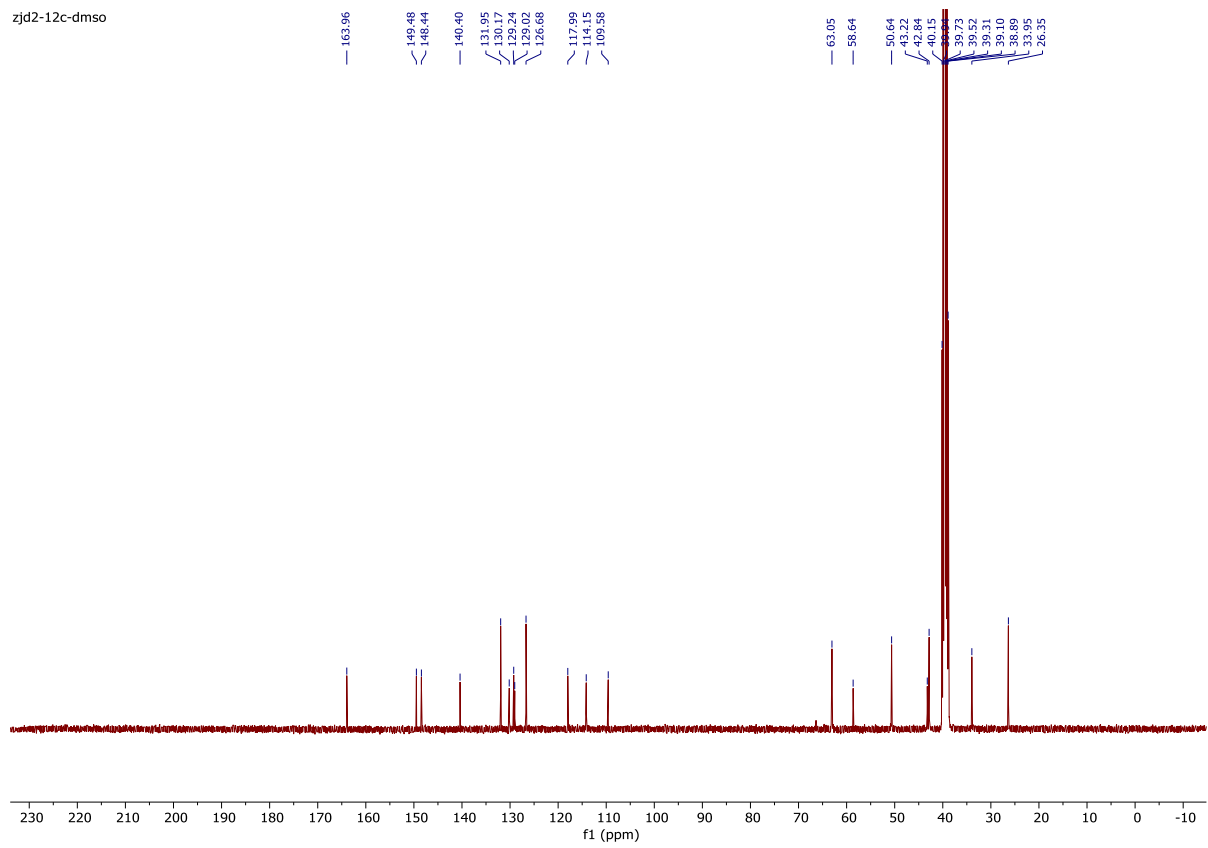

Supplement: NIHMS1743651-supplement-Supplemental_material.pdf [file NIHMS1743651-supplement-Supplemental_material.pdf]
